# Supplementary material for: Association between socioeconomic status and prevalence of non-communicable diseases risk factors and comorbidities in Bangladesh: findings from a nationwide cross-sectional survey
Source: PubMed Central journal article supplement — BMJ Open. 2019 Mar 13;9(3):e025538. doi: 10.1136/bmjopen-2018-025538 (PMC6429850; doi:10.1136/bmjopen-2018-025538), 2019-03-13
Supplement: bmjopen-2018-025538.draft_revisions.pdf [file bmjopen-2018-025538.draft_revisions.pdf]

# BMJ Open

BMJ Open is committed to open peer review. As part of this commitment we make the peer review history of every article we publish publicly available.

When an article is published we post the peer reviewers' comments and the authors' responses online. We also post the versions of the paper that were used during peer review. These are the versions that the peer review comments apply to.

The versions of the paper that follow are the versions that were submitted during the peer review process. They are not the versions of record or the final published versions. They should not be cited or distributed as the published version of this manuscript.

BMJ Open is an open access journal and the full, final, typeset and author-corrected version of record of the manuscript is available on our site with no access controls, subscription charges or pay-per-view fees (<http://bmjopen.bmj.com>).

If you have any questions on BMJ Open's open peer review process please email [info.bmjopen@bmj.com](mailto:info.bmjopen@bmj.com)

# BMJ Open

## High socioeconomic status associated with greater prevalence of NCD risk factors and co-morbidities in Bangladesh. Findings from a nationwide survey

|                               |                                                                                                                                                                                                                                                                                                                                                                                                                                                                               |
|-------------------------------|-------------------------------------------------------------------------------------------------------------------------------------------------------------------------------------------------------------------------------------------------------------------------------------------------------------------------------------------------------------------------------------------------------------------------------------------------------------------------------|
| Journal:                      | <i>BMJ Open</i>                                                                                                                                                                                                                                                                                                                                                                                                                                                               |
| Manuscript ID                 | bmjopen-2018-025538                                                                                                                                                                                                                                                                                                                                                                                                                                                           |
| Article Type:                 | Research                                                                                                                                                                                                                                                                                                                                                                                                                                                                      |
| Date Submitted by the Author: | 23-Aug-2018                                                                                                                                                                                                                                                                                                                                                                                                                                                                   |
| Complete List of Authors:     | Biswas, Tuhin; International Centre for Diarrhoeal Disease Research Bangladesh, Townsend, Nick<br>Islam, Md.saimul; University of Rajshahi, Department of Statistics;<br>Islam, Md. Rajibul ; Health Intervention and Technology Assessment Program (HITAP), Ministry of Public Health, Nonthaburi, Thailand<br>Das Gupta, Rajat; BRAC University James P Grant School of Public Health, Das, Sumon<br>Mamun, Abdullah; University of Queensland, School of Population Health |
| Keywords:                     | Health services research < Health policies and all other topics, DIABETES & ENDOCRINOLOGY, Hypertension < CARDIOLOGY, obesity                                                                                                                                                                                                                                                                                                                                                 |
|                               |                                                                                                                                                                                                                                                                                                                                                                                                                                                                               |

SCHOLARONE™  
Manuscripts

1  
2  
3 **1 Title: High socioeconomic status associated with greater prevalence of NCD**  
4  
5  
6 **2 risk factors and co-morbidities in Bangladesh. Findings from a nationwide**  
7  
8  
9 **3 survey**  
10  
11  
12  
13  
14

15 **5 Authors:**  
16  
17

18 6 Tuhin Biswas<sup>1,2\*</sup>, Nick Townsend<sup>3</sup>, Md. Saimul Islam<sup>4</sup>, Md. Rajibul Islam<sup>5</sup>, Rajat Das Gupta<sup>6</sup>,  
19  
20  
21 7 Sumon Kumar Das<sup>2</sup>, Abdullah Al Mamun<sup>2</sup>  
22  
23  
24  
25  
26  
27

28 **9 Affiliations:**  
29  
30

31 10 <sup>1</sup> Health Systems and Population Studies Division, icddr,b, Mohakhali, Dhaka, Bangladesh  
32

33 11 <sup>2</sup>Institute for Social Science Research, The University of Queensland, Long Pocket Precinct,  
34  
35 12 Indooroopilly, Queensland, Australia.  
36  
37

38 13 <sup>3</sup> Centre on Population Approaches for Non-Communicable Disease Prevention, Nuffield  
39  
40  
41 14 Department of Population Health, University of Oxford, Old Road Campus, Headington  
42  
43 15 Oxford, OX3 7LF, England.  
44  
45  
46  
47

48 17 <sup>4</sup>University Rajshahi, Rajshahi, Bangladesh.  
49  
50

51 18 <sup>5</sup> Health Intervention and Technology Assessment Program (HITAP), Ministry of Public Health,  
52  
53 19 Nonthaburi, Thailand.  
54  
55  
56  
57

1  
2  
3 20 <sup>6</sup> BRAC James P Grant School of Public Health, BRAC University, Mohakhali, Dhaka,  
4  
5 21 Bangladesh.

6  
7  
8  
9 22

10  
11  
12 23 **\*Corresponding author:**

13  
14 24 Tuhin Biswas

15  
16  
17 25 Health Systems and Population Studies Division, icddr,b, Mohakhali, Dhaka, Bangladesh;

18  
19 26 Institute for Social Science Research, The University of Queensland, Long Pocket Precinct,

20  
21 27 Indooroopilly, Queensland, Australia.

22  
23  
24  
25 28 **Email:** [tuhin\\_sps04@yahoo.com](mailto:tuhin_sps04@yahoo.com), [t.biswas@uqconnect.edu.au](mailto:t.biswas@uqconnect.edu.au)

26  
27  
28 29  
29  
30  
31  
32  
33  
34  
35  
36  
37  
38  
39  
40  
41  
42  
43  
44  
45  
46  
47  
48  
49  
50  
51  
52  
53  
54  
55  
56  
57

1  
2  
3 30 **ABSTRACT**  
4  
5

6 31 **Objectives:** This study aimed to find out prevalence and distribution patterns of co-morbidity of  
7  
8 32 non-communicable diseases (NCD) among the adult population in Bangladesh by measures of  
9  
10  
11 33 socio-economic status..  
12  
13

14 34  
15  
16  
17 35 **Design:** This was a cross-sectional study.  
18  
19  
20  
21 36  
22  
23

24  
25 37 **Setting:** This study used Bangladesh Demographic and Health Survey (2011) data.  
26  
27  
28 38  
29  
30

31 39 **Participants:** Total 8,763 individual aged  $\geq 35$  years were included.  
32  
33  
34  
35 40  
36  
37

38  
39 41 **Primary and secondary outcome measures:** The primary outcome was diabetes (DM),  
40  
41 42 hypertension (HTN) and overweight/obesity. The study further assesses factors associated with  
42  
43 43 co-morbidities, in particular socio-economic status.  
44  
45  
46  
47 44  
48  
49

50 45 **Results:** Of 8,763 adults, 12% had diabetes (DM), 27% hypertension (HTN) and 22% were  
51  
52 46 overweight ( $BMI \geq 23 \text{ kg/m}^2$ ). Just over 1% of the sample had all three conditions, 3% had both  
53  
54 47 DM and HTN, 3% DM and overweight and 7% HTN and overweight. Diabetes, hypertension  
55  
56  
57

1  
2  
3 48 and overweight was more prevalent amongst those who had higher education, were non-manual  
4  
5 49 workers, were in the richer to richest socioeconomic status and lived in urban settings.  
6  
7  
8 50 Individuals in higher socio-economic status groups were also more likely to suffer from co-  
9  
10 51 morbidity.  
11  
12  
13 52  
14  
15

16 53 **Conclusions:** In contrast to more affluent countries, individual NCD risk factors and co-  
17  
18 54 morbidities are more common in higher socio-economic status individuals. Public health  
19  
20  
21 55 approaches must consider this social patterning in tackling NCDs in the country.  
22  
23  
24 56  
25  
26  
27

28 57 **Key words:** Obesity, Overweight, Noncommunicable Disease, Bangladesh  
29  
30  
31  
32  
33  
34  
35  
36  
37  
38  
39  
40  
41  
42  
43  
44  
45  
46  
47  
48  
49  
50  
51  
52  
53  
54  
55  
56  
57

## 58 STRENGTHS AND LIMITATIONS OF THE STUDY

- 59 • The biggest strength of the study is that it utilized validated measures to collect of socio-  
60 economic status and biomarker.
- 61 • The weakness of the study is the cross-sectional nature meaning that only associations can be  
62 inferred and causality cannot be determined.
- 63 • the study was representative only for the participants aged 35 years or older.

## 64 INTRODUCTION

65 According to the Global Burden of Disease report, Non-communicable diseases (NCDs)  
66 are the leading cause of death<sup>1-3</sup> with 80% of NCD mortality occurring in low- and middle-  
67 income countries (LMICs).<sup>4-6</sup> The NCDs global status report (2014) showed that of 58 million  
68 deaths that occurred globally in 2012, 38 million - almost two thirds - were due to NCDs,  
69 comprising mainly cardiovascular diseases, cancers, diabetes and chronic lung diseases.<sup>7</sup> More  
70 than 40% of these deaths (16 million) were in individuals under the age of 70 years, often  
71 referred to as premature deaths. Deaths at these younger ages may be a greater demonstration of  
72 its burden, as many consider them preventable. It is alarming, therefore, that the majority of  
73 premature deaths (82%) occur in LMICs, with this problem likely to increase if the appropriate  
74 interventions are not implemented.

75 Like many LMICs, Bangladesh is undergoing rapid urbanization and changing patterns of  
76 diseases among the population<sup>8,9</sup> with some suggesting the country is at an advanced phase of  
77 the third stage of the epidemiologic transition, with deaths from NCDs expected to increase very  
78 rapidly.<sup>10</sup> This increasing mortality from NCDs in the country is supported by high prevalence of  
79 the medical risk factors associated with NCDs. A recent WHO STEPS survey in Bangladesh  
80 reporting that 21% of the population had hypertension, 26% were overweight and 5% had  
81 documented diabetes.<sup>11</sup>

82 Of increasing concern is the issue of co-morbidity, in which individuals suffer from more  
83 than one of the risk factors at a time, with this thought to be highly predictive of end point  
84 diseases, disability and death.<sup>12</sup> However, most of the literature on co-morbidity of risk factors,  
85 including obesity, diabetes and hypertension, come predominantly from industrialised countries



1  
2  
3 86 <sup>13-15</sup> with evidence on NCD co-morbidity scant in less affluent countries, including Bangladesh.  
4  
5 87 This is important as the patterning of NCDs is not uniform across countries of different income  
6  
7 88 classification, with a higher prevalence of some NCD risk factors, such as diabetes, found in  
8  
9 89 higher socio-economic groups in many studies in LMICs, contradicting those from higher  
10  
11 90 income countries.<sup>16</sup>  
12  
13  
14

15 91 With the rapid transition of under nutrition to over-nutrition in these LMICs,  
16  
17 92 understanding co-morbidity and their correlates are important to develop NCD policy for  
18  
19 93 individual countries. Despite the availability of nationwide survey, data in Bangladesh, the  
20  
21 94 prevalence, and in particular the co-morbidity of NCD medical risk factors remains unmapped.  
22  
23 95 This understanding of the burden and patterning of NCDs and their risk factors is important if  
24  
25 96 Bangladesh is able to meet the Sustainable Development Goals (SDGs) target of reducing  
26  
27 97 premature death from NCDs by one third by 2030.<sup>17</sup>  
28  
29  
30  
31

32 98 This study used 2011 Bangladesh Demography and Health Survey (BDHS) data to  
33  
34 99 estimate the prevalence and pattern of NCD risk factors and co-morbidity among the general  
35  
36 100 population aged 35 years and older, as well as determining their socio-demographic patterning  
37  
38 101 and possible predictors of co-morbidity.  
39  
40  
41  
42  
43  
44  
45  
46

## 104 **METHODS**

### 105 **study design**

106 This study is based on secondary data analysis of the 2011 Bangladesh Demography and  
107 Health Survey (BDHS). The 2011 BDHS was a cross-sectional nationally representative survey

1  
2  
3 108 conducted between July and December 2011 through the collaboration of the National Institute  
4  
5 109 of Population Research and Training (NIPORT), ICF International (USA), and Mitra and  
6  
7 110 Associates. Participants in the BDHS were selected using probability sampling based on a two-  
8  
9 111 stage cluster sample of households, and stratified by rural and urban areas in the seven  
10  
11 112 administrative regions of Bangladesh. The detailed protocol and methods have been published  
12  
13 113 previously.<sup>18</sup> In brief, 17,500 households were surveyed, of which one in three households were  
14  
15 114 randomly selected for biomarker measurement. All men and women age 35 years and above  
16  
17 115 were eligible for the biomarker test and total biomarker measures were collected from 8,835  
18  
19 116 individuals (male: 4524, female: 4311) who were eligible and were available during the time of  
20  
21 117 data collection.<sup>19</sup> In our analysis, we included a sample 8763 cases after excluding missing  
22  
23 118 values.  
24  
25  
26  
27  
28  
29  
30  
31

## 32 **measurements of outcome**

33  
34 121 A data collection team including a health technician measured blood pressure, blood  
35  
36 122 glucose concentration, body weight, and height using standard methods.<sup>18</sup> Diabetes (DM) was  
37  
38 123 defined as fasting blood glucose level greater than or equal to 7.0 mmol/L or self-reported  
39  
40 124 diabetes medication use.<sup>20</sup> Body mass index (BMI) was calculated as weight (kg)/height (m<sup>2</sup>).  
41  
42 125 Using Asian specific BMI cut-offs underweight was defined as <18.5 kg/m<sup>2</sup>, overweight (higher  
43  
44 126 BMI) as ≥23kg/m<sup>2</sup>.<sup>21</sup> Hypertension (HTN) was defined as systolic blood pressure (SBP) ≥140  
45  
46 127 mmHg and diastolic blood pressure (DBP) ≥90 mmHg or self-reported anti-hypertensive  
47  
48 128 medication use during the survey.<sup>22</sup> We categorized the co-morbidity into four group such as  
49  
50 129 respondents having DM and HTN (group A), DM and overweight (group B), HTN and  
51  
52  
53  
54  
55  
56  
57

1  
2  
3 130 overweight(group C) and group D in which individuals had all three conditions (DM, HTN and  
4  
5 131 overweight).

6  
7  
8 132

9  
10 133 **socio-demographic factors**

11  
12 134 We categorized age as older (defined as 56 years and above) and younger (35 to 55  
13  
14 135 years) [23]. Education status was characterized by no education, preschool, primary, secondary  
15  
16 136 and College or higher. Occupation was categorized manual and non-manual worker.<sup>24</sup>. Wealth  
17  
18 137 index was determine using principle component analysis using presence of household assets and  
19  
20 138 overall method was describe in detail in the BDHS 2011 report. Place of residence (urban and  
21  
22 139 rural) and sex (male and female) were also considered socio-demographic factors.

23  
24  
25  
26 140

27  
28 141

29  
30  
31 142 **statistical analysis**

32  
33 143 HTN, DM, overweight and all possible combinations of the co-morbidity conditions  
34  
35 144 were the main outcomes interest. For analysis purposes, all outcomes were made dichotomous  
36  
37 145 (persons with/without risk factor).Sex, age, education, occupation, wealth index and place of  
38  
39 146 residence were included in analysis as independent variables. The prevalence of DM, HTN,  
40  
41 147 overweight and co-morbidity are shown in percentages. Using modified Poisson regression  
42  
43 148 (PR) models with robust error variance; we calculated the prevalence ratio (PR) and 95%  
44  
45 149 confidence interval for DM, HTN and overweight/obesity all analyses were adjusted for cluster  
46  
47 150 and sample weight. The analysis was done using IBMSPSS 21. The authors followed the  
48  
49 151 Strengthening the Reporting of Observational Studies in Epidemiology (STROBE) Statement in  
50  
51 152 writing this manuscript (supplementary file 1).

153

154 **ethical consideration**

155 BDHS 2011 received ethical approval from ICF Macro Institutional Review Board,  
 156 Maryland, USA and National Research Ethics Committee of Bangladesh Medical Research  
 157 Council (BMRC), Dhaka, Bangladesh. Written informed consent was taken from the participants  
 158 before the survey.

159

160 **patient involvement**

161 Patients were not involved in the study.

162

163 **FINDINGS**

164 The study population (n=8763) comprised 51% males, around 56% were 56 years of age  
 165 or older, 62% reported no education, 25% were in manual employment, and 76% lived in rural  
 166 location (Table 1).

167 **Table-1: General characteristics of the study population**

| Variables  | n    | %     |
|------------|------|-------|
| <b>Sex</b> |      |       |
| Male       | 4480 | 51.13 |
| Female     | 4283 | 48.87 |

|                           |      |       |
|---------------------------|------|-------|
| <b>Age</b>                |      |       |
| Younger                   | 3603 | 55.77 |
| Older                     | 2858 | 44.23 |
| <b>Education</b>          |      |       |
| College or higher         | 592  | 6.75  |
| Secondary                 | 1129 | 12.88 |
| Primary                   | 1634 | 18.64 |
| No education, preschool   | 5409 | 61.72 |
| <b>Occupation</b>         |      |       |
| Manual                    | 2142 | 24.89 |
| Non-manual                | 6464 | 75.11 |
| <b>Wealth index</b>       |      |       |
| Poorest                   | 1696 | 19.36 |
| Poorer                    | 1671 | 19.06 |
| Middle                    | 1692 | 19.31 |
| Richer                    | 1784 | 20.35 |
| Richest                   | 1921 | 21.92 |
| <b>Place of residence</b> |      |       |
| Rural                     | 6623 | 75.58 |
| Urban                     | 2140 | 24.42 |

168

169 Among the study population 12% had diabetes, 27% had HTN and 22% were classified as  
 170 overweight (BMI  $\geq$  23 kg/m<sup>2</sup>). Predictive probability of diabetes, hypertension and BMI present in

1  
2  
3 171 figure-1. According to that probability of having diabetes and hypertension increasing by  
4  
5 172 increasing age group. But probability having higher BMI is higher in younger age group  
6  
7  
8 173 compare to older age group. Prevalence of all these conditions were higher amongst males than  
9  
10 174 females. The prevalence of group-1 (DM and HTN) and group 2 co-morbidities was 3%, 7% of  
11  
12 175 the sample had group-3 co-morbidity (HTN and overweight), were as 1% had all three  
13  
14 176 conditions (DM, HTN and overweight). Prevalence of all group of co-morbid condition was also  
15  
16  
17 177 higher in male compare to female except for group 2 (DM and overweight) (Figure 2).  
18  
19  
20 178

21  
22  
23 179 The prevalence of individual conditions and all co-morbidities was higher amongst  
24  
25 180 older individuals, those with a 'College or higher' education, 'non-manual' workers, people in  
26  
27  
28 181 the richest quintile for wealth index and those living in urban environments (Table 2).  
29  
30  
31 182

183 **Table-2: Prevalence of individual conditions and comorbidities by characteristics**

| <b>Variables</b>  | <b>Diabetes (%)</b> | <b>Hypertension (%)</b> | <b>Overweight (%)</b> | <b>Group-A (%)<br/>(Diabetes and hypertension )</b> | <b>Group-B(%)<br/>(Diabetes and overweight)</b> | <b>Group-C(%)<br/>(Hypertension and overweight)</b> | <b>Group-D(%)<br/>(Diabetes, hypertension and overweight)</b> |
|-------------------|---------------------|-------------------------|-----------------------|-----------------------------------------------------|-------------------------------------------------|-----------------------------------------------------|---------------------------------------------------------------|
| <b>Age</b>        |                     |                         |                       |                                                     |                                                 |                                                     |                                                               |
| Younger           | 10.2                | 19.2                    | 24.6                  | 2.2                                                 | 3.5                                             | 8.5                                                 | 1.4                                                           |
| Older             | 14.7                | 38.7                    | 18.0                  | 5.0                                                 | 3.3                                             | 10.1                                                | 2.3                                                           |
| <b>Education</b>  |                     |                         |                       |                                                     |                                                 |                                                     |                                                               |
| College or higher | 22.1                | 33.2                    | 46.1                  | 7.8                                                 | 8.5                                             | 17.5                                                | 4.2                                                           |
| Secondary         | 13.3                | 27.5                    | 70.3                  | 4.8                                                 | 3.6                                             | 7.8                                                 | 1.7                                                           |
| Primary           | 11.6                | 23.6                    | 79.0                  | 3.2                                                 | 2.6                                             | 7.0                                                 | 1.2                                                           |

|                               |      |      |      |     |     |      |     |
|-------------------------------|------|------|------|-----|-----|------|-----|
| No education,<br>preschool    | 9.5  | 28.0 | 86.7 | 2.5 | 1.3 | 5.2  | 0.8 |
| <b>Occupation</b>             |      |      |      |     |     |      |     |
| Manual                        | 6.8  | 14.4 | 10.5 | 1.0 | .8  | 2.6  | 0.4 |
| Non-manual                    | 13.4 | 31.5 | 27.7 | 4.3 | 3.2 | 8.8  | 1.7 |
| <b>Wealth index</b>           |      |      |      |     |     |      |     |
| Poorest                       | 8.4  | 20.6 | 6.7  | 1.7 | .6  | 2.2  | 0.4 |
| Poorer                        | 8.1  | 22.6 | 10.5 | 1.7 | .5  | 2.9  | 0.3 |
| Middle                        | 8.2  | 24.2 | 14.6 | 1.9 | 1.0 | 3.4  | 0.4 |
| Richer                        | 11.8 | 28.8 | 27.8 | 3.4 | 2.5 | 9.3  | 1.2 |
| Richest                       | 20.8 | 38.6 | 47.9 | 8.2 | 8.0 | 17.5 | 4.3 |
| <b>Place of<br/>residence</b> |      |      |      |     |     |      |     |



1  
2  
3  
4  
5  
6  
7  
8  
9  
10  
11  
12  
13  
14  
15  
16  
17  
18  
19  
20  
21  
22  
23  
24  
25  
26  
27  
28  
29  
30  
31  
32  
33  
34  
35  
36  
37  
38  
39  
40  
41  
42  
43  
44  
45  
46  
47

|       |      |      |      |     |     |      |     |
|-------|------|------|------|-----|-----|------|-----|
| Rural | 10.3 | 25.3 | 82.9 | 2.7 | 1.7 | 5.4  | 0.8 |
| Urban | 16.5 | 33.3 | 62.6 | 6.0 | 5.5 | 12.9 | 3.1 |

184

185

For peer review only

1  
2  
3 186 The prevalence ratio, from modified Poisson regression models, of HTN, DM and  
4  
5 187 overweight was significantly higher among those who completed higher education, those living  
6  
7 188 in the urban areas, non-manual workers and richer to richest socioeconomic status. Although  
8  
9 189 there was no sex disparities for diabetes, HTN and overweight was higher in males. The PR of  
10  
11 190 overweight was the only condition which was significantly higher among younger participants  
12  
13  
14 191 (Table 3).  
15  
16  
17  
18  
19  
20  
21  
22  
23  
24  
25  
26  
27  
28  
29  
30  
31  
32  
33  
34  
35  
36  
37  
38  
39  
40  
41  
42  
43  
44  
45  
46  
47  
48  
49  
50  
51  
52  
53  
54  
55  
56  
57

192 **Table-3: Modified Poisson regression models showing prevalence ratios (PR) and 95% confidence intervals for diabetes,**  
 193 **hypertension and overweight by demographic characteristics among Bangladeshi adults**

| Variables               | Diabetes            | Hypertension        | Overweight          |
|-------------------------|---------------------|---------------------|---------------------|
|                         | PR (95% CI)         | PR (95% CI)         | PR (95% CI)         |
| <b>Sex</b>              |                     |                     |                     |
| Female                  | 0.89 (0.74-1.08)    | 0.59 (0.53-0.65) ** | 0.7 (0.62-0.79) **  |
| Male                    | Ref                 | Ref                 | Ref                 |
| <b>Age #</b>            |                     |                     |                     |
| Older                   | 1.48 (1.26-1.73) ** | 1.72 (1.56-1.88) ** | 0.75 (0.67-0.83) ** |
| Younger                 | Ref                 | Ref                 | Ref                 |
| <b>Education</b>        |                     |                     |                     |
| College or higher       | 1.71 (1.32-2.23) ** | 1.36 (1.15-1.61) ** | 2.11 (1.79-2.5) **  |
| Secondary               | 1.16 (0.92-1.48)    | 1.13 (0.99-1.28)    | 1.56 (1.34-1.83) ** |
| Primary                 | 1.21 (0.99-1.48)    | 0.97 (0.87-1.08)    | 1.29 (1.12-1.5) **  |
| No education, preschool | Ref                 | Ref                 | Ref                 |

|                           |                     |                     |                     |
|---------------------------|---------------------|---------------------|---------------------|
| <b>Occupation</b>         |                     |                     |                     |
| Non-manual###             | 1.54 (1.24-1.91) ** | 1.46 (1.28-1.68) ** | 1.62 (1.39-1.90) ** |
| Manual                    | Ref                 | Ref                 | Ref                 |
| <b>Wealth index</b>       |                     |                     |                     |
| Richest                   | 1.63 (1.25-2.14) ** | 1.49 (1.29-1.72) ** | 4.3 (3.32-5.57) **  |
| Richer                    | 1.04 (0.79-1.35)    | 1.24 (1.08-1.42) ** | 3.07 (2.39-3.95) ** |
| Middle                    | 0.77 (0.58-1.03)    | 1.05 (0.91-1.21)    | 1.8 (1.38-2.36) **  |
| Poorer                    | 0.94 (0.71-1.24)    | 1.01 (0.87-1.16)    | 1.45 (1.09-1.92) ** |
| Poorest                   | Ref                 | Ref                 | Ref                 |
| <b>Place of residence</b> |                     |                     |                     |
| Urban                     | 1.1 (0.92-1.32)     | 1.05 (0.95-1.15)    | 1.09 (0.98-1.21)    |
| Rural                     | Ref                 | Ref                 | Ref                 |

195 # Younger-(35–55 years and older (56 years or older) [23].

196 ##\*Non-manual category included sedentary workers, professionals (e.g., doctors, teachers, etc.), housewives, retired persons, those  
 197 unable to work and unemployed [24].

198 \*\*Statistical significance at  $p < 0.05$

1  
2  
3 199 In univariate Poisson regression models those in the richest quintile of wealth index had the  
4  
5 200 highest prevalence ratio of all co-morbidity groups. These differences remained significant in all  
6  
7  
8 201 models in a stepwise process (Supplementary Table 1). In final models once controlling for sex,  
9  
10 202 age, education, occupation and level of urbanisation, with those in the richest quintile 2.3 times  
11  
12 203 as likely to have DM and HTN, 4.8 times as likely to have DM and overweight, 4.9 times as  
13  
14 204 likely to have HTN and overweight and 4.0 times as likely to have all three co-morbidities than  
15  
16  
17 205 those in the poorest quintile. In these final models non-manual workers were also significantly  
18  
19 206 more likely than manual workers to have all co-morbidity groups. Sex differences were lost,  
20  
21 207 except for HTN and overweight in which females were 1.4 times as likely to experience both and  
22  
23  
24 208 older participants were significantly more likely to have DM and HTN and all co-morbidities  
25  
26 209 (Table 4).  
27  
28  
29  
30  
31  
32  
33  
34  
35  
36  
37  
38  
39  
40  
41  
42  
43  
44  
45  
46  
47  
48  
49  
50  
51  
52  
53  
54  
55  
56  
57

210 **Table-4: Modified stepwise Poisson regression models showing prevalence ratios (PR) and 95% confidence intervals for co-**  
 211 **morbidities by demographic characteristics among Bangladeshi adults.**

212

| Model                                                                                  | Group-A<br>(Diabetes and hypertension ) | Group-B<br>(Diabetes and overweight) | Group-C<br>(Hypertension and overweight) | Group-D<br>(Diabetes, hypertension and overweight) |
|----------------------------------------------------------------------------------------|-----------------------------------------|--------------------------------------|------------------------------------------|----------------------------------------------------|
| <b>Model-1 (Wealth index )</b>                                                         |                                         |                                      |                                          |                                                    |
| <i>Wealth index</i>                                                                    |                                         |                                      |                                          |                                                    |
| Richest                                                                                | 3.94 (2.42-6.41)**                      | 9.69 (4.84-19.4) **                  | 6.83 (4.66-10) **                        | 8.67 (3.65-20.56) **                               |
| Richer                                                                                 | 1.52 (0.88-2.61)                        | 3.39 (1.61-7.16) **                  | 3.78 (2.53-5.64) **                      | 2.44 (0.95-6.31)                                   |
| Middle                                                                                 | 0.9 (0.47-1.71)                         | 1.63 (0.69-3.81)                     | 1.3 (0.81-2.07)                          | 1.17 (0.37-3.7)                                    |
| Poorer                                                                                 | 0.9 (0.47-1.73)                         | 0.81 (0.31-2.16)                     | 1.13 (0.7-1.84)                          | 0.79 (0.24-2.64)                                   |
| Poorest                                                                                | Ref                                     | Ref                                  | Ref                                      | Ref                                                |
| <b>Model-6 ( Wealth index + sex+ age + education+ occupation+ place of residence )</b> |                                         |                                      |                                          |                                                    |
| <i>Wealth index</i>                                                                    |                                         |                                      |                                          |                                                    |
| Richest                                                                                | 2.32 (1.32-4.1) **                      | 4.84 (2.26-10.4) **                  | 4.85 (3.25-7.24) **                      | 3.99 (1.58-10.11) **                               |

|                         |                     |                  |                     |                     |
|-------------------------|---------------------|------------------|---------------------|---------------------|
| Richer                  | 1.12 (0.66-1.91)    | 2.22 (1.02-4.8)  | 3.03 (2.04-4.49)    | 1.59 (0.65-3.92)    |
| Middle                  | 0.74 (0.39-1.38)    | 1.23 (0.54-2.82) | 1.1 (0.69-1.75)     | 0.9 (0.31-2.64)     |
| Poorer                  | 0.78 (0.41-1.48)    | 0.71 (0.27-1.88) | 1.06 (0.65-1.7)     | 0.7 (0.22-2.24)     |
| Poorest                 | Ref                 | Ref              | Ref                 | Ref                 |
| <b>Sex</b>              |                     |                  |                     |                     |
| Female                  | 0.67 (0.35-1.31)    | 0.91 (0.47-1.78) | 1.44 (1.06-1.96) ** | 1.05 (0.46-2.36)    |
| Male                    | Ref                 | Ref              | Ref                 | Ref                 |
| <b>Age</b>              |                     |                  |                     |                     |
| Older                   | 2.17 (1.58-2.99) ** | 0.87 (0.62-1.21) | 1.11 (0.91-1.35)    | 1.61 (1.05-2.49) ** |
| Younger                 | Ref                 | Ref              | Ref                 | Ref                 |
| <b>Education</b>        |                     |                  |                     |                     |
| College or higher       | 1.38 (0.85-2.25)    | 1.53 (0.93-2.5)  | 1.09 (0.82-1.45)    | 1.4 (0.74-2.63)     |
| Secondary               | 1.06 (0.68-1.65)    | 1.33 (0.8-2.19)  | 0.91 (0.68-1.2)     | 1.24 (0.65-2.38)    |
| Primary                 | 1.03 (0.69-1.53)    | 1.42 (0.89-2.26) | 1.18 (0.93-1.5)     | 1.25 (0.69-2.28)    |
| No education, preschool | Ref                 | Ref              | Ref                 | Ref                 |
| <b>Occupational</b>     |                     |                  |                     |                     |

|                           |                     |                    |                     |                     |
|---------------------------|---------------------|--------------------|---------------------|---------------------|
| Non-manual                | 3.27 (1.94-5.52) ** | 4.22 (2.26-7.9) ** | 3.04 (2.19-4.22) ** | 3.69 (1.63-8.36) ** |
| Manual                    | Ref                 | Ref                | Ref                 | Ref                 |
| <i>Place of residence</i> |                     |                    |                     |                     |
| Urban                     | 1.33 (0.9-1.95)     | 1.17 (0.8-1.72)    | 1.04 (0.85-1.27)    | 1.72 (0.99-3.01)    |
| Rural                     | Ref                 | Ref                | Ref                 | Ref                 |

213

214 \*\* Statistical significance at  $p < 0.05$



## 215 DISCUSSION

216  
217 This is the first study in Bangladesh that investigated individual and co-morbid  
218 condition using nationally representative sample. We found that within the Bangladesh adult  
219 population, aged more than 35 years, the prevalence of diabetes was 12%, hypertension 27% and  
220 22% were overweight. Diabetes, hypertension and overweight comparatively higher in male  
221 compare to female. More than 14% of the sample also had more than one condition, with 1.3%  
222 exhibiting all three. It was also reported that individual prevalence and co-morbidity were higher  
223 in high socio-economic status, and once controlling for several confounders those in the richest  
224 quintile of wealth index were significantly more likely than those in poorest quintile to exhibit  
225 co-morbidities.

226 In the current study, Overweight and diabetes risk seems greater among young people  
227 which is consistent with the study we conducted in Indonesia.<sup>25</sup> Diabetes, hypertension and  
228 overweight more prevalent in non-manual labour compare to manual labour, with consist of  
229 another study in Barbados.<sup>26</sup> Our study demonstrated male to be more vulnerable for co-morbid  
230 condition than females, which was completely opposite from other studies.<sup>27, 28</sup> On the other  
231 hand, our study reveal that prevalence of individual condition (diabetes, hypertension and  
232 overweight) and co-morbidity higher in urban area compare to rural counterpart. These findings  
233 are consistent with study conducted in developing countries including Bangladesh.<sup>29-34</sup> Rapid  
234 growth of overweight in Bangladesh in becoming one of the major public health problems.<sup>35-37</sup>  
235 Because like other developing country Bangladesh also have experience on nutritional transition  
236 and increases in gross domestic product (GDP), which have also been associated with multiple  
237 shifts in food intake and reduced physical activity.<sup>38</sup> Recent study using four geographical region

1  
2  
3 238 data including Bangladesh reported that Every standard deviation higher of BMI was associated  
4  
5 239 with 1.65 and 1.60 times higher probability of diabetes and 1.42 and 1.28 times higher  
6  
7  
8 240 probability of hypertension.<sup>39</sup>  
9

10  
11 241 This paper is the first to study Non-communicable diseases (NCDs) risk factor co-  
12  
13 242 morbidities within a Bangladesh population. It uses a national representative dataset, the 2011  
14  
15 243 Bangladesh Demography and Health Survey (BDHS), resulting in a national representative  
16  
17  
18 244 sample with good power for statistical analysis.  
19

20  
21 245 Although, to the authors knowledge this is the first study on the prevalence of NCD  
22  
23 246 risk factor co-morbidity in Bangladesh, a previous study had observed the association between  
24  
25  
26 247 anthropometric indices such as body mass index (BMI), waist circumference (WC) and waist  
27  
28  
29 248 hip ratio (WHR) and cardio metabolic risk indicators (FBG, SBP and DBP).<sup>40</sup> A further study in  
30  
31 249 four geographical regions, including Bangladesh, reported that every standard deviation higher  
32  
33 250 of BMI was associated with 1.65 and 1.60 times higher probability of diabetes and 1.42 and 1.28  
34  
35  
36 251 times higher probability of hypertension, for men and women, respectively.<sup>39</sup> Other studies have  
37  
38 252 also found that HTN is a common co-morbid condition in DM, and vice versa,<sup>41</sup> whilst there is  
39  
40  
41 253 considerable evidence for an increased prevalence of HTN in diabetic persons from other  
42  
43 254 populations.<sup>42, 43</sup>  
44

45  
46 255 Our study reported individual condition and co-morbidities higher in high socio-  
47  
48 256 economic group. These findings conflict with trends reported by previous studies conducted in  
49  
50 257 higher-income countries.<sup>44, 45</sup> However, another multicounty study in low income country (LIMs)  
51  
52  
53 258 reported the co-morbidity was more prevalent among the poor and less educated.<sup>46</sup> But one of the  
54  
55 259 limitations of that study was self-reported diagnosis, which may introduce biases. Previous  
56  
57

1  
2  
3 260 research in INDEPTH Asian sites has reported inverse associations between co-morbidity and  
4  
5 261 markers of socioeconomic status.<sup>47</sup>  
6  
7  
8  
9 262

10  
11 263 The main implications of the this study are the increased burden of NCDs within  
12  
13  
14 264 Bangladesh, along with other LMICs and the patterning of more than one risk factors within  
15  
16 265 individuals in the population. In contrast to findings from high income countries prevalence of  
17  
18 266 individual risk factors and co-morbidities was higher in higher SES groups. This points to  
19  
20 267 differences between countries in the population level determinants of NCDs and highlights that  
21  
22 268 context specific interventions must be developed to counter them. As a first step, it is important  
23  
24 269 that countries collect and analyse high quality health data to allow them to develop and target  
25  
26 270 interventions.  
27  
28  
29  
30

31 271

## 32 33 34 272 **STRENGTHS AND LIMITATIONS**

35  
36  
37 273 Measurements were taken by health technicians, WHO measured blood pressure, blood  
38  
39 274 glucose concentration, body weight, and height using standard methods including biomarker  
40  
41 275 analysis and validated measures of socio-economic status collected. The main weakness of the  
42  
43 276 study is the cross-sectional nature meaning that only associations can be inferred and causality  
44  
45 277 cannot be determined. In addition although clinical measures of the diabetes, hypertension and  
46  
47 278 overweight were taken, no measurements of blood lipids were taken in the survey, meaning that  
48  
49 279 metabolic syndrome could not be investigated. Waist circumference and hip circumference were  
50  
51 280 also not collected, limiting the analysis that could be performed. Finally although the study was  
52  
53  
54  
55  
56  
57

1  
2  
3 281 reported to be representative, only participants 35 years or older had measured anthropometry  
4  
5 282 and biomarkers.  
6  
7  
8  
9 283

## 10 11 12 284 **CONCLUSION** 13 14

15 285 Several socio-demographic factors associated with DM, HTN, overweight and co-morbid  
16  
17  
18 286 condition. There is an urgent need to improve monitoring and management of NCDs through  
19  
20 287 primary care linked programmes. Policy and system changes are essential to reduce risk in  
21  
22 288 population. At the same time for prevention and control of NCDs needs “political will” societal  
23  
24  
25 289 and community support.  
26  
27

28 290  
29  
30

## 31 291 **Contributors** 32 33

34 292 TB, NT, SKD & AAM conceptualized the study. TB, NT, SKD, RDG & AAM designed the  
35  
36 293 study and acquired the data. TB, SI & MRI conducted the data analysis. TB, NT, SI, MRI, SKD  
37  
38 294 & AAM interpreted the data. TB, NT & RDG prepared the first draft. TB, NT, SKD & AAM  
39  
40 295 participated in critical revision of the manuscript and contributed to its intellectual improvement.  
41  
42  
43 296 All authors went through the final draft and approved it for submission.  
44  
45  
46

47 297  
48  
49

## 50 298 **Funding** 51 52

53 299 None.  
54  
55  
56  
57

1  
2  
3 300  
4  
56 301 **Acknowledgments**  
7  
8

9 302 The authors thank MEASURE DHS for permission to use data from the 2011  
10  
11 303 Bangladesh DHS. The authors are also grateful to Mr. Mehedi Hasan, PhD student, University of  
12  
13 304 Queensland, Australia.  
14  
15

16 305 **Competing Interests**  
17  
18

19 306 None declared.  
20  
21  
22  
23 307  
24  
25

26 308 **Patient consent**  
27  
28

29 309 None Declared  
30  
31  
32  
33 310  
34

35 311 **Disclaimer**  
36  
37

38 312 The authors are alone responsible for the integrity and accuracy of data analysis and the writing  
39  
40 313 the manuscript.  
41  
42 314  
43  
44

45 315 **Ethics approval**  
46  
47

48 316 The datasets were obtained from DHS Programme with proper procedure. The study exempt  
49  
50 317 from collecting ethical approval because the survey protocols were reviewed and approved by  
51  
52 318 ICF Macro Institutional Review Board, Maryland, USA and National Research Ethics  
53  
54 319 Committee of Bangladesh Medical Research Council (BMRC), Dhaka, Bangladesh.  
55  
56  
57

1  
2  
3  
4 3205  
6  
7 321 **Data sharing statement**8  
9  
10 322 The dataset of BDHS 2011 is available at the Demographic and Health Surveys Program. Extra11  
12  
13 323 data is available which is available on request at <http://dhsprogram-com/what-we->14  
15 324 [do/survey/survey-display-349.cfm](http://dhsprogram-com/what-we-do/survey/survey-display-349.cfm).16  
17  
18 32519  
20  
21 326

**References:**

1. Murray CJ, Vos T, Lozano R, et al. Disability-adjusted life years (DALYs) for 291 diseases and injuries in 21 regions, 1990–2010: a systematic analysis for the Global Burden of Disease Study 2010. *Lancet*. 2013;380(9859):2197-223. doi: 10.1016/S0140-6736(12)61689-4.
2. Lozano R, Naghavi M, Foreman K, et al. Global and regional mortality from 235 causes of death for 20 age groups in 1990 and 2010: a systematic analysis for the Global Burden of Disease Study 2010. *Lancet*. 2013;380(9859):2095-128. doi: 10.1016/S0140-6736(12)61728-0
3. Bennett D, Bisanzio D, Deribew A, et al. Global, regional, and national under-5 mortality, adult mortality, age-specific mortality, and life expectancy, 1970–2016: a systematic analysis for the Global Burden of Disease Study 2016. *Lancet*. 2017;390(10100):1084-1150. doi: 10.1016/s0140-6736(17)31833-0.
4. World Health Organization. Global status report on noncommunicable diseases 2010. Geneva: World Health Organization; 2011. 161 p.
5. Abegunde DO, Mathers CD, Adam T, et al. The burden and costs of chronic diseases in low-income and middle-income countries. *Lancet*. 2007;370(9603):1929-38. doi: 10.1016/S0140-6736(07)61696-1
6. Lee JT, Hamid F, Pati S, et al. Impact of noncommunicable disease multimorbidity on healthcare utilisation and out-of-pocket expenditures in middle-income countries: cross sectional analysis. *PLoS One*. 2015;10(7):e0127199. doi: 10.1371/journal.pone.0127199.
7. World Health Organization. Global status report on noncommunicable diseases 2014. Geneva: World Health Organization; 2015. 280 p.
8. Streatfield PK, Karar ZA. Population challenges for Bangladesh in the coming decades. *J Health Popul Nutr*. 2008;26(3):261.

- 1  
2  
3 350 9. National Institute of Population Research and Training (NIPORT), Mitra and Associates,  
4  
5 351 ICF International. Bangladesh Urban Health Survey 2013.. Dhaka, Bangladesh, Calverton,  
6  
7 352 Maryland, USA: NIPORT, Mitra and Associates, and ICF International., 2015.  
8  
9  
10 353 10. Ahsan KZ, Alam MN, Streatfield PK, et al. Has Bangladesh Entered the Fourth Stage of  
11  
12 354 the Epidemiologic Transition?. Proceedings of the International seminar on Mortality: Past,  
13  
14 355 Present and Future; 2017Aug 7-8; the University of Campinas, Brazil.  
15  
16  
17 356 11. Zaman MM, Bhuiyan MR, Karim MN, et al. Clustering of non-communicable diseases  
18  
19 357 risk factors in Bangladeshi adults: an analysis of STEPS survey 2013. *BMC Public Health*.  
20  
21 358 2015;15(1):659. doi: 10.1186/s12889-015-1938-4.  
22  
23  
24 359 12. Hillas G, Perlikos F, Tsiligianni I, et al. Managing comorbidities in COPD. *Int J Chron*  
25  
26 360 *Obstruct Pulmon Dis*.2015;10:95. doi: 10.2147/COPD.S54473.  
27  
28  
29 361 13. Shukla A, Kumar K, Singh A. Association between obesity and selected morbidities: a  
30  
31 362 study of BRICS countries. *PloS One*. 2014;9(4):e94433. doi: 10.1371/journal.pone.0094433.  
32  
33 363 14. Wang J, Ma JJ, Liu J, et al. Prevalence and Risk Factors of Comorbidities among  
34  
35 364 Hypertensive Patients in China. *Int J Med Sci*. 2017;14(3):201. doi: 10.7150/ijms.16974.  
36  
37  
38 365 15. Bosu WK. The prevalence, awareness, and control of hypertension among workers in  
39  
40 366 West Africa: a systematic review. *Glob Health Action*. 2015;8(1):26227. doi:  
41  
42 367 10.3402/gha.v8.26227.  
43  
44  
45 368 16. Allen L, Williams J, Townsend N, et al. Socioeconomic status and non-communicable  
46  
47 369 disease behavioural risk factors in low-income and lower-middle-income countries: a systematic  
48  
49 370 review. *Lancet Glob Health*. 2017;5(3):e277-e89. doi: 10.1016/S2214-109X(17)30058-X.  
50  
51  
52  
53  
54  
55  
56  
57



- 1  
2  
3 371 17. Varghese C. Reducing premature mortality from non-communicable diseases, including  
4  
5 372 for people with severe mental disorders. *World Psychiatry*. 2017;16(1):45-7. doi:  
6  
7 373 10.1002/wps.20376.  
8  
9  
10 374 18. National Institute of Population Research and Training (NIPORT), Mitra and Associates,  
11  
12 375 ICF International. Bangladesh Demographic and Health Survey 2011, Preliminary Report.  
13  
14 376 Dhaka, Bangladesh, Calverton, Maryland, USA: NIPORT, Mitra and Associates, and ICF  
15  
16 377 International., 2012.  
17  
18  
19 378 19. Biswas T, Islam MS, Linton N, et al. Socio-economic inequality of chronic non-  
20  
21 379 communicable diseases in Bangladesh. *PloS One*. 2016;11(11):e0167140. doi:  
22  
23 380 10.1371/journal.pone.0167140.  
24  
25  
26 381 20. Akter S, Rahman MM, Abe SK, et al. Prevalence of diabetes and prediabetes and their  
27  
28 382 risk factors among Bangladeshi adults: a nationwide survey. *Bull World Health Organ*.  
29  
30 383 2014;92(3):204-13A. doi: 10.2471/BLT.13.128371.  
31  
32  
33 384 21. Ke-You G, Da-Wei F. The magnitude and trends of under-and over-nutrition in Asian  
34  
35 385 countries. *Biomed Environ Sci*. 2001;14(1-2):53-60.  
36  
37  
38 386 22. National Institute of Population Research and Training (NIPORT), Mitra and Associates,  
39  
40 387 ICF International. Bangladesh Demographic and Health Survey 2011. Dhaka, Bangladesh,  
41  
42 388 Calverton, Maryland, USA: NIPORT, Mitra and Associates, and ICF International., 2013.  
43  
44  
45 389 23. Rahman M, Williams G, Al Mamun A. Hypertension and diabetes prevalence among  
46  
47 390 adults with moderately increased BMI (23· 0–24· 9 kg/m<sup>2</sup>): findings from a nationwide survey  
48  
49 391 in Bangladesh. *Public Health Nutr*. 2017:1-8. doi: 10.1017/S1368980016003566.  
50  
51  
52  
53  
54  
55  
56  
57

- 1  
2  
3 392 24. Alam DS, Chowdhury MA, Siddiquee AT, et al. Prevalence and determinants of chronic  
4  
5 393 obstructive pulmonary disease (COPD) in Bangladesh. *COPD*. 2015;12(6):658-67. doi:  
6  
7 394 10.3109/15412555.2015.1041101.  
8  
9  
10 395 25. Hussain MA, Huxley RR, Al Mamun A. Multimorbidity prevalence and pattern in  
11  
12 396 Indonesian adults: an exploratory study using national survey data. *BMJ Open*.  
13  
14 397 2015;5(12):e009810. doi: 10.1136/bmjopen-2015-009810.  
15  
16  
17 398 26. Howitt C, Hambleton IR, Rose AM, et al. Social distribution of diabetes, hypertension  
18  
19 399 and related risk factors in Barbados: a cross-sectional study. *BMJ Open*. 2015;5(12):e008869.  
20  
21 400 doi: 10.1136/bmjopen-2015-008869.  
22  
23  
24 401 27. Pearson TA. Education and income: double-edged swords in the epidemiologic transition  
25  
26 402 of cardiovascular disease. *Ethn Dis*. 2003;13(2; SUPP/2):S2-158.  
27  
28  
29 403 28. Agborsangaya CB, Lau D, Lahtinen M, et al. Multimorbidity prevalence and patterns  
30  
31 404 across socioeconomic determinants: a cross-sectional survey. *BMC Public Health*.  
32  
33 405 2012;12(1):201. doi: 10.1186/1471-2458-12-201.  
34  
35  
36 406 29. Rahman M, Williams G, Al Mamun A. Gender differences in hypertension awareness,  
37  
38 407 antihypertensive use and blood pressure control in Bangladeshi adults: findings from a national  
39  
40 408 cross-sectional survey. *J Health Popul Nutr*. 2017;36(1):23. doi: 10.1186/s41043-017-0101-5.  
41  
42  
43 409 30. Li G, Hu H, Dong Z, et al. Urban and suburban differences in hypertension trends and  
44  
45 410 self-care: Three population-based cross-sectional studies from 2005-2011. *PloS One*.  
46  
47 411 2015;10(2):e0117999. doi: 10.1371/journal.pone.0117999.  
48  
49  
50 412 31. Sola A, Chinyere O, Stephen A, et al. Hypertension prevalence in an urban and rural area  
51  
52 413 of Nigeria. *J Med Sci*. 2013;4:149-54.  
53  
54  
55  
56  
57

- 1  
2  
3 414 32. Dhungana RR, Pandey AR, Bista B, et al. Prevalence and associated factors of  
4  
5 415 hypertension: a community-based cross-sectional study in municipalities of Kathmandu, Nepal.  
6  
7 416 *Int J Hypertens*.2016;2016. doi: 10.1155/2016/1656938.  
8  
9  
10 417 33. Chowdhury MAB, Uddin MJ, Haque MR, et al. Hypertension among adults in  
11  
12 418 Bangladesh: evidence from a national cross-sectional survey. *BMC Cardiovasc Disord*.  
13  
14 419 2016;16(1):22. doi: 10.1186/s12872-016-0197-3.  
15  
16  
17 420 34. Akter S, Rahman MM, Abe SK, et al. Prevalence of diabetes and prediabetes and their  
18  
19 421 risk factors among Bangladeshi adults: a nationwide survey. *Bull World Health*  
20  
21 422 *Organ*.2014;92(3):204-13A. doi: 10.2471/BLT.13.128371  
22  
23  
24 423 35. Biswas T, Uddin MJ, Al Mamun A, et al. Increasing prevalence of overweight and  
25  
26 424 obesity in Bangladeshi women of reproductive age: Findings from 2004 to 2014. *PloS One*.  
27  
28 425 2017;12(7):e0181080. doi: 10.1371/journal.pone.0181080.  
29  
30  
31 426 36. Hoque ME, Hasan MT, Rahman M, et al. Double burden of underweight and overweight  
32  
33 427 among Bangladeshi adults differs between men and women: evidence from a nationally  
34  
35 428 representative survey. *Public Health Nutr*.2017;20(12):2183-91. doi:  
36  
37 429 10.1017/S1368980017000957.  
38  
39  
40 430 37. Biswas T, Garnett SP, Pervin S, et al. The prevalence of underweight, overweight and  
41  
42 431 obesity in Bangladeshi adults: Data from a national survey. *PloS One*. 2017;12(5):e0177395. doi:  
43  
44 432 10.1371/journal.pone.0177395.  
45  
46  
47 433 38. Dietz WH. Double-duty solutions for the double burden of malnutrition. *Lancet*. 2017.  
48  
49 434 doi: 10.1016/S0140-6736(17)32479-0.  
50  
51  
52  
53  
54  
55  
56  
57

- 1  
2  
3 435 39. Patel SA, Ali MK, Alam D, et al. Obesity and its relation with diabetes and hypertension:  
4  
5 436 a cross-sectional study across 4 geographical regions. *Glob Heart*.2016;11(1):71-9. e4. doi:  
6  
7 437 10.1016/j.ghheart.2016.01.003.  
8  
9  
10 438 40. Bhowmik B, Afsana F, Ahmed T, et al. Obesity and associated type 2 diabetes and  
11  
12 439 hypertension in factory workers of Bangladesh. *BMC Res Notes*.2015;8(1):460. doi:  
13  
14 440 10.1186/s13104-015-1377-4.  
15  
16  
17 441 41. Pradeepa R. The rising burden of diabetes and hypertension in southeast asian and african  
18  
19 442 regions: need for effective strategies for prevention and control in primary health care settings.  
20  
21 443 *Int J Hypertens*. 2013;2013. doi: 10.1155/2013/409083.  
22  
23  
24 444 42. Berraho M, El Achhab Y, Benslimane A, et al. Hypertension and type 2 diabetes: a cross-  
25  
26 445 sectional study in Morocco (EPIDIAM Study). *Pan Afr Med J*. 2012;11(1).  
27  
28  
29 446 43. Hashemizadeh H, Sarvelayati D. Hypertension and Type 2 Diabetes: A Cross-sectional  
30  
31 447 Study in Hospitalized Patients in Quchan, Iran. *Iran J Diabetes Obesity*. 2013;5(1):21-6.  
32  
33  
34 448 44. Connolly V, Unwin N, Sherriff P, et al. Diabetes prevalence and socioeconomic status: a  
35  
36 449 population based study showing increased prevalence of type 2 diabetes mellitus in deprived  
37  
38 450 areas. *J Epidemiol Community Health*.2000;54(3):173-7.  
39  
40  
41 451 45. Glover JD, Hetzel DM, Tennant SK. The socioeconomic gradient and chronic illness and  
42  
43 452 associated risk factors in Australia. *Aust New Zealand Health Policy*. 2004;1(1):8. doi:  
44  
45 453 10.1186/1743-8462-1-8.  
46  
47  
48 454 46. Hosseinpoor AR, Bergen N, Mendis S, et al. Socioeconomic inequality in the prevalence  
49  
50 455 of noncommunicable diseases in low-and middle-income countries: results from the World  
51  
52 456 Health Survey. *BMC Public Health*. 2012;12(1):474. doi: 10.1186/s12889-015-2227-y.  
53  
54  
55  
56  
57

1  
2  
3 457 47. Van Minh H, Ng N, Juvekar S, et al. Self-reported prevalence of chronic diseases and  
4  
5 458 their relation to selected sociodemographic variables: a study in INDEPTH Asian sites, 2005.  
6  
7 459 *Prev Chronic Dis.*2008;5(3).  
8  
9  
10  
11  
12  
13  
14  
15  
16  
17  
18  
19  
20  
21  
22  
23  
24  
25  
26  
27  
28  
29  
30  
31  
32  
33  
34  
35  
36  
37  
38  
39  
40  
41  
42  
43  
44  
45  
46  
47  
48  
49  
50  
51  
52  
53  
54  
55  
56  
57

For peer review only

1  
2  
3 **460 Figures:**  
4

5  
6 **461 Fig 1. Predictive probability of diabetes, hypertension and BMI by age**  
7

8 **462 Fig 2. Prevalence of diabetes, hypertension, overweight and co-morbidity by sex among**  
9

10 **463 Bangladeshi adults**  
11  
12

13 464  
14  
15

16  
17 **465 Supplementary Materials:**  
18

19  
20 **466 Supplementary File 1: STROBE Checklist**  
21

22  
23 **467 Supplementary File 2: Supplementary Table 1: Modified stepwise Poisson regression models**  
24

25 **468 showing prevalence ratios (PR) and 95% confidence intervals for co-morbidities by demographic**  
26

27 **469 characteristics among Bangladeshi adults.**  
28  
29  
30  
31  
32  
33  
34  
35  
36  
37  
38  
39  
40  
41  
42  
43  
44  
45  
46  
47  
48  
49  
50  
51  
52  
53  
54  
55  
56  
57

1  
2  
3  
4  
5  
6  
7  
8  
9  
10  
11  
12  
13  
14  
15  
16  
17  
18  
19  
20  
21  
22  
23  
24  
25  
26  
27  
28  
29  
30  
31  
32  
33  
34  
35  
36  
37  
38  
39  
40  
41  
42  
43  
44  
45  
46  
47  
48  
49  
50  
51  
52  
53  
54  
55  
56  
57  
58  
59  
60

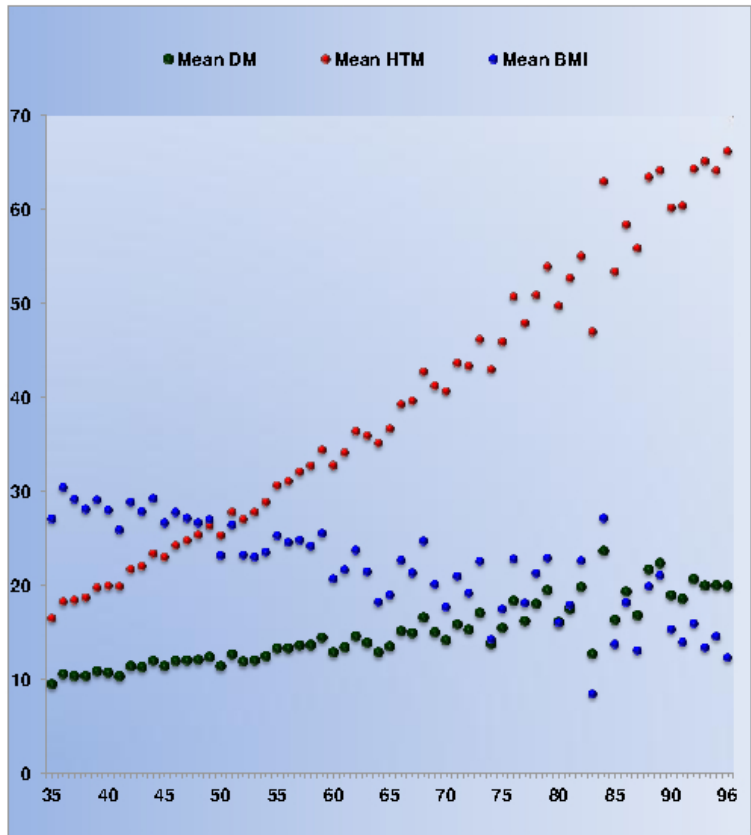

Predictive probability of diabetes, hypertension and BMI by age  
215x279mm (72 x 72 DPI)

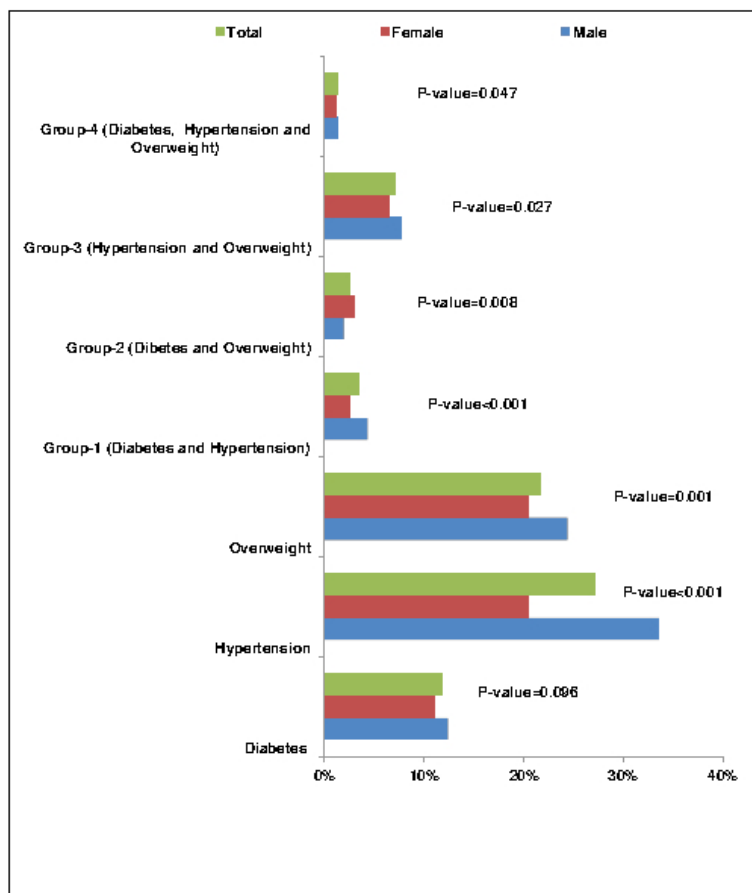

Prevalence of diabetes, hypertension, overweight and co-morbidity by sex among Bangladeshi adults

215x279mm (72 x 72 DPI)



**Supplementary Table 1: Modified stepwise Poisson regression models showing prevalence ratios (PR) and 95% confidence intervals for co-morbidities by demographic characteristics among Bangladeshi adults.**

|                                                       | <b>Group-A<br/>(Diabetes and hypertension )</b> | <b>Group-B<br/>(Diabetes and overweight)</b> | <b>Group-C<br/>(Hypertension and overweight)</b> | <b>Group-D<br/>(Diabetes, hypertension and overweight)</b> |
|-------------------------------------------------------|-------------------------------------------------|----------------------------------------------|--------------------------------------------------|------------------------------------------------------------|
| <b>Model-1 (Wealth index )</b>                        |                                                 |                                              |                                                  |                                                            |
| <i>Wealth index</i>                                   |                                                 |                                              |                                                  |                                                            |
| Richest                                               | 3.94 (2.42-6.41)**                              | 9.69 (4.84-19.4) **                          | 6.83 (4.66-10) **                                | 8.67 (3.65-20.56) **                                       |
| Richer                                                | 1.52 (0.88-2.61)                                | 3.39 (1.61-7.16) **                          | 3.78 (2.53-5.64) **                              | 2.44 (0.95-6.31)                                           |
| Middle                                                | 0.9 (0.47-1.71)                                 | 1.63 (0.69-3.81)                             | 1.3 (0.81-2.07)                                  | 1.17 (0.37-3.7)                                            |
| Poorer                                                | 0.9 (0.47-1.73)                                 | 0.81 (0.31-2.16)                             | 1.13 (0.7-1.84)                                  | 0.79 (0.24-2.64)                                           |
| Poorest                                               | Ref                                             | Ref                                          | Ref                                              | Ref                                                        |
| <b>Model-2 (Wealth index + sex)</b>                   |                                                 |                                              |                                                  |                                                            |
| <i>Wealth index</i>                                   |                                                 |                                              |                                                  |                                                            |
| Richest                                               | 3.93 (2.42-6.39) **                             | 9.68 (4.84-19.35) **                         | 6.88 (4.7-10.08) **                              | 8.69 (3.68-20.5) **                                        |
| Richer                                                | 1.51 (0.88-2.6)                                 | 3.39 (1.61-7.14) **                          | 3.82 (2.56-5.69) **                              | 2.45 (0.96-6.3)                                            |
| Middle                                                | 0.9 (0.47-1.71)                                 | 1.62 (0.69-3.8)                              | 1.31 (0.82-2.09)                                 | 1.17 (0.37-3.69)                                           |
| Poorer                                                | 0.89 (0.47-1.71)                                | 0.81 (0.31-2.15)                             | 1.16 (0.72-1.89)                                 | 0.8 (0.24-2.63)                                            |
| Poorest                                               | Ref                                             | Ref                                          | Ref                                              | Ref                                                        |
| <i>Sex</i>                                            |                                                 |                                              |                                                  |                                                            |
| Female                                                | 0.85 (0.43-1.66)                                | 0.95 (0.49-1.85)                             | 1.66 (1.22-2.26) **                              | 1.21 (0.53-2.74)                                           |
| Male                                                  | Ref                                             | Ref                                          | Ref                                              | Ref                                                        |
| <b>Model-3 (Wealth index + sex+ age )</b>             |                                                 |                                              |                                                  |                                                            |
| <i>Wealth index</i>                                   |                                                 |                                              |                                                  |                                                            |
| Richest                                               | 4.04 (2.49-6.56) **                             | 9.65 (4.82-19.3) **                          | 6.92 (4.73-10.13) **                             | 8.82 (3.74-20.82) **                                       |
| Richer                                                | 1.51 (0.88-2.59)                                | 3.4 (1.61-7.14) **                           | 3.81 (2.55-5.67) **                              | 2.44 (0.95-6.26)                                           |
| Middle                                                | 0.88 (0.46-1.67)                                | 1.63 (0.7-3.81)                              | 1.3 (0.81-2.07)                                  | 1.15 (0.37-3.65)                                           |
| Poorer                                                | 0.86 (0.45-1.64)                                | 0.82 (0.31-2.15)                             | 1.15 (0.71-1.87)                                 | 0.78 (0.24-2.57)                                           |
| Poorest                                               | Ref                                             | Ref                                          | Ref                                              | Ref                                                        |
| <i>Sex</i>                                            |                                                 |                                              |                                                  |                                                            |
| Female                                                | 0.75 (0.39-1.46)                                | 0.97 (0.5-1.88)                              | 1.61 (1.18-2.19) **                              | 1.13 (0.5-2.54)                                            |
| Male                                                  | Ref                                             | Ref                                          | Ref                                              | Ref                                                        |
| <i>Age</i>                                            |                                                 |                                              |                                                  |                                                            |
| Older                                                 | 2.34 (1.71-3.2) **                              | 0.88 (0.65-1.2)                              | 1.23 (1.03-1.47) **                              | 1.6 (1.05-2.42) **                                         |
| Younger                                               | Ref                                             | Ref                                          | Ref                                              | Ref                                                        |
| <b>Model-4 (Wealth index + sex+ age + education )</b> |                                                 |                                              |                                                  |                                                            |
| <i>Wealth index</i>                                   |                                                 |                                              |                                                  |                                                            |
| Richest                                               | 3.62 (2.16-6.07) **                             | 7.84 (3.74-16.45) **                         | 6.76 (4.55-10.03) **                             | 7.56 (3.11-18.42) **                                       |
| Richer                                                | 1.45 (0.84-2.51)                                | 2.98 (1.37-6.5)                              | 3.77 (2.53-5.63) **                              | 2.24 (0.87-5.8)                                            |
| Middle                                                | 0.87 (0.46-1.64)                                | 1.5 (0.65-3.5)                               | 1.28 (0.81-2.05)                                 | 1.1 (0.36-3.36)                                            |

|                                                                                        |                     |                     |                     |                      |
|----------------------------------------------------------------------------------------|---------------------|---------------------|---------------------|----------------------|
| Poorer                                                                                 | 0.85 (0.45-1.63)    | 0.78 (0.29-2.09)    | 1.15 (0.71-1.86)    | 0.77 (0.23-2.51)     |
| Poorest                                                                                | Ref                 | Ref                 | Ref                 | Ref                  |
| <b>Sex</b>                                                                             |                     |                     |                     |                      |
| Female                                                                                 | 0.76 (0.39-1.49)    | 1.04 (0.53-2.05)    | 1.62 (1.18-2.22) ** | 1.19 (0.52-2.71)     |
| Male                                                                                   | Ref                 | Ref                 | Ref                 | Ref                  |
| <b>Age</b>                                                                             |                     |                     |                     |                      |
| Older                                                                                  | 2.45 (1.79-3.36) ** | 0.97 (0.7-1.34)     | 1.25 (1.04-1.51) ** | 1.72 (1.11-2.65) **  |
| Younger                                                                                | Ref                 | Ref                 | Ref                 | Ref                  |
| <b>Education</b>                                                                       |                     |                     |                     |                      |
| College or higher                                                                      | 1.54 (0.96-2.5)     | 1.73 (1.06-2.83) ** | 1.21 (0.91-1.61)    | 1.59 (0.85-2.97)     |
| Secondary                                                                              | 0.97 (0.62-1.51)    | 1.22 (0.74-2.01)    | 0.84 (0.64-1.12)    | 1.12 (0.59-2.15)     |
| Primary                                                                                | 0.96 (0.64-1.42)    | 1.35 (0.85-2.14)    | 1.13 (0.9-1.43)     | 1.17 (0.65-2.11)     |
| No education, preschool                                                                | Ref                 | Ref                 | Ref                 | Ref                  |
| <b>Model-5 ( Wealth index + sex+ age + education+ occupation )</b>                     |                     |                     |                     |                      |
| <b>Wealth index</b>                                                                    |                     |                     |                     |                      |
| Richest                                                                                | 2.72 (1.6-4.61) **  | 5.3 (2.54-11.05) ** | 4.97 (3.37-7.33) ** | 5.47 (2.32-12.91) ** |
| Richer                                                                                 | 1.18 (0.69-2.04)    | 2.29 (1.06-4.95) ** | 3.06 (2.06-4.53) ** | 1.79 (0.71-4.49)     |
| Middle                                                                                 | 0.75 (0.4-1.41)     | 1.24 (0.54-2.85)    | 1.11 (0.7-1.76)     | 0.93 (0.31-2.76)     |
| Poorer                                                                                 | 0.78 (0.41-1.49)    | 0.72 (0.27-1.88)    | 1.06 (0.65-1.7)     | 0.7 (0.22-2.26)      |
| Poorest                                                                                | Ref                 | Ref                 | Ref                 | Ref                  |
| <b>Sex</b>                                                                             |                     |                     |                     |                      |
| Female                                                                                 | 0.67 (0.35-1.31)    | 0.91 (0.47-1.78)    | 1.44 (1.06-1.96) ** | 1.05 (0.47-2.37)     |
| Male                                                                                   | Ref                 | Ref                 | Ref                 | Ref                  |
| <b>Age</b>                                                                             |                     |                     |                     |                      |
| Older                                                                                  | 2.13 (1.54-2.94) ** | 0.86 (0.62-1.19)    | 1.11 (0.91-1.34)    | 1.54 (1.00-2.38) **  |
| Younger                                                                                | Ref                 | Ref                 | Ref                 | Ref                  |
| <b>Education</b>                                                                       |                     |                     |                     |                      |
| College or higher                                                                      | 1.4 (0.86-2.28)     | 1.54 (0.94-2.51)    | 1.09 (0.82-1.45)    | 1.44 (0.77-2.71)     |
| Secondary                                                                              | 1.05 (0.67-1.64)    | 1.32 (0.8-2.18)     | 0.9 (0.68-1.2)      | 1.22 (0.63-2.35)     |
| Primary                                                                                | 1.03 (0.69-1.53)    | 1.41 (0.89-2.25)    | 1.18 (0.93-1.49)    | 1.24 (0.68-2.26)     |
| No education, preschool                                                                | Ref                 | Ref                 | Ref                 | Ref                  |
| <b>Occupational</b>                                                                    |                     |                     |                     |                      |
| Non-manual                                                                             | 3.32 (1.97-5.59) ** | 4.25 (2.27-7.97) ** | 3.04 (2.19-4.23) ** | 3.79 (1.67-8.61) **  |
| Manual                                                                                 | Ref                 | Ref                 | Ref                 | Ref                  |
| <b>Model-5 ( Wealth index + sex+ age + education+ occupation+ place of residence )</b> |                     |                     |                     |                      |
| <b>Wealth index</b>                                                                    |                     |                     |                     |                      |
| Richest                                                                                | 2.32 (1.32-4.1) **  | 4.84 (2.26-10.4) ** | 4.85 (3.25-7.24) ** | 3.99 (1.58-10.11) ** |
| Richer                                                                                 | 1.12 (0.66-1.91)    | 2.22 (1.02-4.8)     | 3.03 (2.04-4.49)    | 1.59 (0.65-3.92)     |
| Middle                                                                                 | 0.74 (0.39-1.38)    | 1.23 (0.54-2.82)    | 1.1 (0.69-1.75)     | 0.9 (0.31-2.64)      |
| Poorer                                                                                 | 0.78 (0.41-1.48)    | 0.71 (0.27-1.88)    | 1.06 (0.65-1.7)     | 0.7 (0.22-2.24)      |

|                           |                     |                    |                     |                     |
|---------------------------|---------------------|--------------------|---------------------|---------------------|
| Poorest                   | Ref                 | Ref                | Ref                 | Ref                 |
| <b>Sex</b>                |                     |                    |                     |                     |
| Female                    | 0.67 (0.35-1.31)    | 0.91 (0.47-1.78)   | 1.44 (1.06-1.96) ** | 1.05 (0.46-2.36)    |
| Male                      | Ref                 | Ref                | Ref                 | Ref                 |
| <b>Age</b>                |                     |                    |                     |                     |
| Older                     | 2.17 (1.58-2.99) ** | 0.87 (0.62-1.21)   | 1.11 (0.91-1.35)    | 1.61 (1.05-2.49) ** |
| Younger                   | Ref                 | Ref                | Ref                 | Ref                 |
| <b>Education</b>          |                     |                    |                     |                     |
| College or higher         | 1.38 (0.85-2.25)    | 1.53 (0.93-2.5)    | 1.09 (0.82-1.45)    | 1.4 (0.74-2.63)     |
| Secondary                 | 1.06 (0.68-1.65)    | 1.33 (0.8-2.19)    | 0.91 (0.68-1.2)     | 1.24 (0.65-2.38)    |
| Primary                   | 1.03 (0.69-1.53)    | 1.42 (0.89-2.26)   | 1.18 (0.93-1.5)     | 1.25 (0.69-2.28)    |
| No education, preschool   | Ref                 | Ref                | Ref                 | Ref                 |
| <b>Occupational</b>       |                     |                    |                     |                     |
| Non-manual                | 3.27 (1.94-5.52) ** | 4.22 (2.26-7.9) ** | 3.04 (2.19-4.22) ** | 3.69 (1.63-8.36) ** |
| Manual                    | Ref                 | Ref                | Ref                 | Ref                 |
| <b>Place of residence</b> |                     |                    |                     |                     |
| Urban                     | 1.33 (0.9-1.95)     | 1.17 (0.8-1.72)    | 1.04 (0.85-1.27)    | 1.72 (0.99-3.01)    |
| Rural                     | Ref                 | Ref                | Ref                 | Ref                 |

For peer review only

1  
2  
3  
4  
5  
6  
7  
8  
9  
10  
11  
12  
13  
14  
15  
16  
17  
18  
19  
20  
21  
22  
23  
24  
25  
26  
27  
28  
29  
30  
31  
32  
33  
34  
35  
36  
37  
38  
39  
40  
41  
42  
43  
44  
45  
46  
47

**STROBE 2007 (v4) Statement—Checklist of items that should be included in reports of *cross-sectional studies***

***Title of the study: High socioeconomic status associated with greater prevalence of NCD risk factors and co-morbidities in Bangladesh. Findings from a nationwide survey***

| Section/Topic             | Item # | Recommendation                                                                                                                                                                       | Reported on page # |
|---------------------------|--------|--------------------------------------------------------------------------------------------------------------------------------------------------------------------------------------|--------------------|
| Title and abstract        | 1      | (a) Indicate the study’s design with a commonly used term in the title or the abstract                                                                                               | 1                  |
|                           |        | (b) Provide in the abstract an informative and balanced summary of what was done and what was found                                                                                  | 3-4                |
| <b>Introduction</b>       |        |                                                                                                                                                                                      |                    |
| Background/rationale      | 2      | Explain the scientific background and rationale for the investigation being reported                                                                                                 | 6-7                |
| Objectives                | 3      | State specific objectives, including any prespecified hypotheses                                                                                                                     | 7                  |
| <b>Methods</b>            |        |                                                                                                                                                                                      |                    |
| Study design              | 4      | Present key elements of study design early in the paper                                                                                                                              | 7-8                |
| Setting                   | 5      | Describe the setting, locations, and relevant dates, including periods of recruitment, exposure, follow-up, and data collection                                                      | 7-8                |
| Participants              | 6      | (a) Give the eligibility criteria, and the sources and methods of selection of participants                                                                                          | 7-8                |
| Variables                 | 7      | Clearly define all outcomes, exposures, predictors, potential confounders, and effect modifiers. Give diagnostic criteria, if applicable                                             | 8-9                |
| Data sources/ measurement | 8*     | For each variable of interest, give sources of data and details of methods of assessment (measurement). Describe comparability of assessment methods if there is more than one group | 8-9                |
| Bias                      | 9      | Describe any efforts to address potential sources of bias                                                                                                                            | 9                  |
| Study size                | 10     | Explain how the study size was arrived at                                                                                                                                            | 9                  |
| Quantitative variables    | 11     | Explain how quantitative variables were handled in the analyses. If applicable, describe which groupings were chosen and why                                                         | 9                  |
| Statistical methods       | 12     | (a) Describe all statistical methods, including those used to control for confounding                                                                                                | 9                  |
|                           |        | (b) Describe any methods used to examine subgroups and interactions                                                                                                                  | Not applicable     |

|                          |     |                                                                                                                                                                                                              |                |
|--------------------------|-----|--------------------------------------------------------------------------------------------------------------------------------------------------------------------------------------------------------------|----------------|
|                          |     | (c) Explain how missing data were addressed                                                                                                                                                                  | Not applicable |
|                          |     | (d) If applicable, describe analytical methods taking account of sampling strategy                                                                                                                           | Not applicable |
|                          |     | (e) Describe any sensitivity analyses                                                                                                                                                                        | Not applicable |
| <b>Results</b>           |     |                                                                                                                                                                                                              |                |
| Participants             | 13* | (a) Report numbers of individuals at each stage of study—eg numbers potentially eligible, examined for eligibility, confirmed eligible, included in the study, completing follow-up, and analysed            | 10-12          |
|                          |     | (b) Give reasons for non-participation at each stage                                                                                                                                                         | Not applicable |
|                          |     | (c) Consider use of a flow diagram                                                                                                                                                                           | Not applicable |
| Descriptive data         | 14* | (a) Give characteristics of study participants (eg demographic, clinical, social) and information on exposures and potential confounders                                                                     | 10-12          |
|                          |     | (b) Indicate number of participants with missing data for each variable of interest                                                                                                                          | Not applicable |
| Outcome data             | 15* | Report numbers of outcome events or summary measures                                                                                                                                                         | 11-22          |
| Main results             | 16  | (a) Give unadjusted estimates and, if applicable, confounder-adjusted estimates and their precision (eg, 95% confidence interval). Make clear which confounders were adjusted for and why they were included | 11-22          |
|                          |     | (b) Report category boundaries when continuous variables were categorized                                                                                                                                    | Not applicable |
|                          |     | (c) If relevant, consider translating estimates of relative risk into absolute risk for a meaningful time period                                                                                             | Not applicable |
| Other analyses           | 17  | Report other analyses done—eg analyses of subgroups and interactions, and sensitivity analyses                                                                                                               | Not applicable |
| <b>Discussion</b>        |     |                                                                                                                                                                                                              |                |
| Key results              | 18  | Summarise key results with reference to study objectives                                                                                                                                                     | 23             |
| Limitations              | 19  | Discuss limitations of the study, taking into account sources of potential bias or imprecision. Discuss both direction and magnitude of any potential bias                                                   | 25-26          |
| Interpretation           | 20  | Give a cautious overall interpretation of results considering objectives, limitations, multiplicity of analyses, results from similar studies, and other relevant evidence                                   | 23-25          |
| Generalisability         | 21  | Discuss the generalisability (external validity) of the study results                                                                                                                                        | 23-25          |
| <b>Other information</b> |     |                                                                                                                                                                                                              |                |
| Funding                  | 22  | Give the source of funding and the role of the funders for the present study and, if applicable, for the original study on which the present article is based                                                | 26             |

\*Give information separately for cases and controls in case-control studies and, if applicable, for exposed and unexposed groups in cohort and cross-sectional studies.

1  
2  
3  
4  
5  
6  
7  
8  
9  
10  
11  
12  
13  
14  
15  
16  
17  
18  
19  
20  
21  
22  
23  
24  
25  
26  
27  
28  
29  
30  
31  
32  
33  
34  
35  
36  
37  
38  
39  
40  
41  
42  
43  
44  
45  
46  
47

**Note:** An Explanation and Elaboration article discusses each checklist item and gives methodological background and published examples of transparent reporting. The STROBE checklist is best used in conjunction with this article (freely available on the Web sites of PLoS Medicine at <http://www.plosmedicine.org/>, Annals of Internal Medicine at <http://www.annals.org/>, and Epidemiology at <http://www.epidem.com/>). Information on the STROBE Initiative is available at [www.strobe-statement.org](http://www.strobe-statement.org).

For peer review only

# BMJ Open

## High socioeconomic status is associated with greater prevalence of NCD risk factors and comorbidities in Bangladesh. Findings from a nationwide survey

|                                 |                                                                                                                                                                                                                                                                                                                                                                                                                                                                                  |
|---------------------------------|----------------------------------------------------------------------------------------------------------------------------------------------------------------------------------------------------------------------------------------------------------------------------------------------------------------------------------------------------------------------------------------------------------------------------------------------------------------------------------|
| Journal:                        | <i>BMJ Open</i>                                                                                                                                                                                                                                                                                                                                                                                                                                                                  |
| Manuscript ID                   | bmjopen-2018-025538.R1                                                                                                                                                                                                                                                                                                                                                                                                                                                           |
| Article Type:                   | Research                                                                                                                                                                                                                                                                                                                                                                                                                                                                         |
| Date Submitted by the Author:   | 26-Nov-2018                                                                                                                                                                                                                                                                                                                                                                                                                                                                      |
| Complete List of Authors:       | Biswas, Tuhin; International Centre for Diarrhoeal Disease Research Bangladesh, Townsend, Nick<br>Islam, Md.saimul; University of Rajshahi, Department of Statistics;<br>Islam, Md. Rajibul ; Health Intervention and Technology Assessment Program (HITAP), Ministry of Public Health, Nonthaburi, Thailand<br>Das Gupta, Rajat; BRAC University James P Grant School of Public Health,<br>Das, Sumon<br>Mamun, Abdullah; University of Queensland, School of Population Health |
| <b>Primary Subject Heading</b>: | Epidemiology                                                                                                                                                                                                                                                                                                                                                                                                                                                                     |
| Secondary Subject Heading:      | Public health, Diabetes and endocrinology, Cardiovascular medicine                                                                                                                                                                                                                                                                                                                                                                                                               |
| Keywords:                       | Overweight, DIABETES & ENDOCRINOLOGY, Hypertension < CARDIOLOGY                                                                                                                                                                                                                                                                                                                                                                                                                  |
|                                 |                                                                                                                                                                                                                                                                                                                                                                                                                                                                                  |

SCHOLARONE™  
Manuscripts



1  
2  
3 1 **Title: High socioeconomic status is associated with greater prevalence of NCD**  
4  
5  
6 2 **risk factors and comorbidities in Bangladesh. Findings from a nationwide**  
7  
8  
9 3 **survey**  
10  
11  
12 4

13  
14  
15 5 **Authors:**  
16  
17

18 6 Tuhin Biswas<sup>1,2\*</sup>, Nick Townsend<sup>3</sup>, Md. Saimul Islam<sup>4</sup>, Md. Rajibul Islam<sup>5</sup>, Rajat Das Gupta<sup>6,7</sup>,  
19  
20  
21 7 Sumon Kumar Das<sup>2</sup>, Abdullah Al Mamun<sup>2</sup>  
22  
23  
24 8

25  
26  
27 9 **Affiliations:**  
28  
29

30  
31 10 <sup>1</sup> Universal Health Coverage, Health Systems and Population Studies Division, icddr,b,  
32  
33 11 Mohakhali, Dhaka, Bangladesh

34  
35 12 <sup>2</sup>Institute for Social Science Research, The University of Queensland, Long Pocket Precinct,  
36  
37 13 Indooroopilly, Queensland, Australia.

38  
39  
40  
41 14 <sup>3</sup>Department for Health, University of Bath, United Kingdom  
42  
43

44 15 <sup>4</sup>University Rajshahi, Rajshahi, Bangladesh.  
45  
46

47 16 <sup>5</sup>Health Intervention and Technology Assessment Program (HITAP), Ministry of Public Health,  
48  
49 17 Nonthaburi, Thailand.  
50  
51  
52

53 18 <sup>6</sup> Centre for Non-Communicable Diseases and Nutrition, BRAC James P Grant School of Public  
54  
55 19 Health, BRAC University, Dhaka, Bangladesh  
56  
57

1  
2  
3 20 <sup>7</sup> Centre for Science of Implementation and Scale-Up, BRAC James P Grant School of Public  
4  
5 21 Health, BRAC University, Dhaka, Bangladesh  
6  
7

8  
9 22 **\*Corresponding author:**

10  
11 23 Biswas Tuhin

12  
13  
14  
15 24 Health Systems and Population Studies Division, icddr,b, Mohakhali, Dhaka, Bangladesh;

16  
17 25 Institute for Social Science Research, The University of Queensland, Long Pocket Precinct,

18  
19 26 Indooroopilly, Queensland, Australia.

20  
21  
22  
23 27 **Email:** [uhin\\_sps0@yahoo.com](mailto:uhin_sps0@yahoo.com)

## 29 ABSTRACT

30 **Objectives:** This study aimed to examine the prevalence and distribution in the comorbidity of  
31 non-communicable diseases (NCD) among the adult population in Bangladesh by measures of  
32 socioeconomic status (SES).

33 **Design:** This was a cross-sectional study.

34 **Setting:** This study used Bangladesh Demographic and Health Survey (2011) data.

35 **Participants:** Total 8,763 individuals aged  $\geq 35$  years were included.

36 **Primary and secondary outcome measures:** The primary outcome measures were diabetes  
37 (DM), hypertension (HTN) and overweight/obesity. The study further assesses factors associated  
38 with comorbidities, in particular socioeconomic status.

39 **Results:** Of 8,763 adults, 12% had DM, 27% HTN and 22% were overweight ( $BMI \geq 23 \text{ kg/m}^2$ ).  
40 Just over 1% of the sample had all three conditions, 3% had both DM and HTN, 3% DM and  
41 overweight and 7% HTN and overweight. Diabetes, hypertension and overweight were more  
42 prevalent those who had higher education, were non-manual workers, were in the richer to richest  
43 socioeconomic status and lived in urban settings. Individuals in higher SES groups were also more  
44 likely to suffer from comorbidities.

45 **Conclusions:** In contrast to more affluent countries, individuals with NCD risk factors and  
46 comorbidities are more common in higher socio-economic status individuals. Public health  
47 approaches must consider this social patterning in tackling NCDs in the country.

48

1  
2  
3 49 **Key words:** Overweight, Diabetes, Hypertension, Non-communicable Disease, socioeconomic  
4 50 status, Bangladesh  
5  
6  
7  
8  
9  
10  
11  
12  
13  
14  
15  
16  
17  
18  
19  
20  
21  
22  
23  
24  
25  
26  
27  
28  
29  
30  
31  
32  
33  
34  
35  
36  
37  
38  
39  
40  
41  
42  
43  
44  
45  
46  
47  
48  
49  
50  
51  
52  
53  
54  
55  
56  
57

For peer review only

## 51 STRENGTHS AND LIMITATIONS OF THE STUDY

- 52 • The biggest strength of the study is that it utilized a large dataset nationally representative of  
53 the Bangladesh population, collected using measures that have been designed and validated  
54 through previous data collections in the country.
- 55 • Data collection included clinical measures of blood pressure, blood glucose concentration,  
56 body weight, and height collected by a health technician.
- 57 • The main weakness of the study is that it is cross-sectional in nature, meaning that only  
58 associations can be inferred and causality cannot be determined.

59

## 60 INTRODUCTION

61 According to the Global Burden of Disease report, non-communicable diseases (NCDs)  
62 are the leading cause of death worldwide<sup>1-3</sup> and that 80% of this NCD mortality actually occurs in  
63 low- and middle-income countries (LMICs)<sup>4-6</sup>. Similarly, the 2014 NCDs global status report  
64 showed that of 58 million deaths that occurred globally in 2012, 38 million - almost two thirds -  
65 were due to NCDs, with these deaths most due to the four most common NCDs: cardiovascular  
66 diseases, cancers, diabetes and chronic lung diseases.<sup>7</sup> In addition, the report showed that more  
67 than 40% of these deaths (16 million) occurred were in individuals under the age of 70 years, often  
68 referred to as premature deaths<sup>7</sup>. Deaths at younger ages may be a greater demonstration of its  
69 burden, as many consider them preventable. It is alarming, therefore, that the majority of premature  
70 deaths (82%) occur in LMICs, with this problem likely to increase if appropriate preventative  
71 actions are not taken at a population level.

72 Like many LMICs, Bangladesh is undergoing rapid urbanization with changing patterns of  
73 diseases among the population<sup>8,9</sup>, with some suggesting that the country is at an advanced phase  
74 of the third stage of the epidemiologic transition, with deaths from NCDs expected to increase  
75 rapidly in the coming years.<sup>10</sup> This increasing mortality from NCDs in the country is supported by  
76 high prevalence of the medical risk factors associated with NCDs. A recent WHO STEPS survey  
77 in Bangladesh reported that 21% of the population had hypertension, 26% were overweight  
78 and 5% had documented diabetes.<sup>11</sup>

79 These high prevalence figures, raise concerns of comorbidity, in which individuals suffer  
80 from more than one of the risk factors at a time, with this thought to be highly predictive of end  
81 point diseases, disability and death.<sup>12</sup> There is evidence of comorbidity risk for factors including

1  
2  
3 82 obesity, diabetes and hypertension, predominantly coming from industrialized countries<sup>13-15</sup> and  
4  
5 83 developing nations<sup>16-18</sup>; however evidence on NCD comorbidity scant in Bangladesh. This is  
6  
7  
8 84 important as the patterning of NCDs is not uniform across countries of different income  
9  
10 85 classification, with a higher prevalence of some NCD risk factors, such as diabetes, found in higher  
11  
12 86 socio-economic groups in many studies in LMICs, contradicting those from higher income  
13  
14  
15 87 countries.<sup>19</sup>  
16  
17

18 88 With the development of a double burden from both over- and under-nutrition in these  
19  
20 89 LMICs, understanding comorbidity and their correlates is important if we are to develop NCD  
21  
22 90 preventative policies contextualized for these countries. Despite the availability of nationwide  
23  
24 91 survey data in Bangladesh, the prevalence, and in particular the comorbidity of NCD medical risk  
25  
26 92 factors remains unmapped. This understanding of the burden and patterning of NCDs and their  
27  
28 93 risk factors is important if Bangladesh is able to meet the Sustainable Development Goals (SDGs)  
29  
30 94 target of reducing premature death from NCDs by one third by 2030.<sup>20</sup>  
31  
32  
33  
34

35 95 This study used 2011 Bangladesh Demography and Health Survey (BDHS) data to estimate  
36  
37 96 the prevalence and pattern of NCD risk factors and comorbidity among the general population  
38  
39 97 aged 35 years and older, as well as determining their socio-demographic patterning and possible  
40  
41 98 predictors of comorbidity .  
42  
43  
44  
45  
46  
47

## 48 100 **METHODS**

### 50 101 **Study design**

53 102 This study used data from the 2011 Bangladesh Demography and Health Survey (BDHS).  
54  
55  
56 103 The 2011 BDHS is a cross-sectional nationally representative survey that was conducted between  
57

1  
2  
3 104 July and December 2011 through the collaboration of the National Institute of Population Research  
4  
5 105 and Training (NIPORT), ICF International (USA), and Mitra and Associates. Participants in the  
6  
7 106 BDHS were selected using probability sampling based on a two-stage cluster sample of  
8  
9  
10 107 households, and stratified by rural and urban areas in the seven administrative regions of  
11  
12 108 Bangladesh. The detailed protocol and methods have been published previously.<sup>21</sup> In brief, 17,500  
13  
14  
15 109 households were surveyed, of which one in three households were randomly selected for  
16  
17 110 biomarker measurement (blood glucose, blood pressure). All men and women age 35 years and  
18  
19 111 above were eligible for the biomarker measures, with these collected from a final sample of 8,835  
20  
21 112 individuals (male: 4524, female: 4311).<sup>22</sup> We included 8763 cases in our analytical sample, after  
22  
23  
24 113 excluding cases with missing values.  
25  
26  
27 114

### 29 115 **Measurements of outcomes**

31  
32 116 A data collection team, including a health technician, measured blood pressure, blood  
33  
34 117 glucose concentration, body weight, and height using standard methods.<sup>21</sup> Diabetes (DM) was  
35  
36 118 defined as a fasting blood glucose level greater than or equal to 7.0 mmol/L or self-reported  
37  
38 119 diabetes medication use.<sup>23</sup> Body mass index (BMI) was calculated as weight (kg)/height (m<sup>2</sup>). We  
39  
40 120 used Asian specific BMI cut-offs to define underweight as <18.5 kg/m<sup>2</sup> and overweight and obese  
41  
42 121 (higher BMI) as ≥23kg/m<sup>2</sup>.<sup>24</sup> Hypertension was defined as systolic blood pressure (SBP) ≥140  
43  
44  
45 122 mmHg and diastolic blood pressure (DBP) ≥90 mmHg or self-reported anti-hypertensive  
46  
47 123 medication use during the survey.<sup>25</sup> We then categorized comorbidity into four groups such as  
48  
49 124 respondents having DM and HTN (group A), DM and overweight (group B), HTN and overweight  
50  
51 125 (group C) and group D in which individuals had all three conditions (DM, HTN and overweight).  
52  
53  
54  
55 126



## 127 **Socio-demographic factors**

128 We categorized age as older (defined as 56 years and above) and younger (35 to 55  
129 years).<sup>26</sup> Education status was characterized into five levels: 1) no education, 2) preschool, 3)  
130 primary, 4) secondary and 5) college or higher. We categorized occupation as manual or non-  
131 manual worker and used principle component analysis to determine a wealth index was as  
132 described in the BDHS 2011 report.<sup>21</sup> Place of residence (urban and rural) and sex (male and  
133 female) were also included as important factors.

## 135 **Statistical analysis**

136 HTN, DM, overweight and obese (hereafter overweight) and all possible combinations  
137 of the comorbidity conditions were the main outcomes of interest. For analysis purposes, all  
138 outcomes were dichotomized into persons with or without the risk factor. Sex, age, education,  
139 occupation, wealth index and place of residence were included in analysis as independent  
140 variables. We calculated the prevalence of DM, HTN, overweight through percentage in the  
141 sample and used modified Poisson regression (PR) models with robust error variance to calculate  
142 prevalence ratios (PR) and 95% confidence interval for DM, HTN and overweight. These analyses  
143 were adjusted for cluster and sample weight and were done using IBMSPSS 21 (IBM Corp.  
144 Released 2012. IBMSPSS Statistics for Windows, Version 21.0. Armonk, NY: IBM Corp.).

## 146 **Ethical consideration and patient involvement**

147 Patients were not involved in the study. BDHS 2011 received ethical approval from ICF  
148 Macro Institutional Review Board, Maryland, USA and National Research Ethics Committee of

1  
2  
3 149 Bangladesh Medical Research Council (BMRC), Dhaka, Bangladesh. Written informed consent  
4  
5 150 was taken from the participants before the survey was completed.  
6  
7

## 8 151 **FINDINGS**

9  
10 152 The study population (n=8763) comprised 51% males, around 56% were 56 years of age  
11  
12 153 or older, 62% reported no education, 25% were in manual employment, and 76% lived in rural  
13  
14 154 locations (Table 1).  
15  
16

17  
18 155 **Table-1: General characteristics of the study population**  
19  
20  
21

| Variables               | n    | %     |
|-------------------------|------|-------|
| <b>Sex</b>              |      |       |
| Male                    | 4480 | 51.13 |
| Female                  | 4283 | 48.87 |
| <b>Age</b>              |      |       |
| Younger                 | 3603 | 55.77 |
| Older                   | 2858 | 44.23 |
| <b>Education</b>        |      |       |
| College or higher       | 592  | 6.75  |
| Secondary               | 1129 | 12.88 |
| Primary                 | 1634 | 18.64 |
| No education, preschool | 5409 | 61.72 |
| <b>Occupation</b>       |      |       |
| Manual                  | 2142 | 24.89 |
| Non-manual              | 6464 | 75.11 |

|                           |      |       |
|---------------------------|------|-------|
| <b>Wealth index</b>       |      |       |
| Poorest                   | 1696 | 19.36 |
| Poorer                    | 1671 | 19.06 |
| Middle                    | 1692 | 19.31 |
| Richer                    | 1784 | 20.35 |
| Richest                   | 1921 | 21.92 |
| <b>Place of residence</b> |      |       |
| Rural                     | 6623 | 75.58 |
| Urban                     | 2140 | 24.42 |

156

157 Among the sample 12% had diabetes, 27% had HTN and 22% were classified as overweight  
 158 (BMI $\geq$ 23kg/m<sup>2</sup>). The probability of having diabetes and hypertension increased by increasing age  
 159 group, whilst the probability of being overweight was higher in the younger age group (Figure 1).  
 160 Prevalence of all these conditions were higher amongst males than females. The prevalence of  
 161 group A (DM and HTN, n=270) and group B (DM and overweight, n=191) comorbidities was  
 162 3%, whilst 7% of the sample had group C comorbidity (HTN and overweight, n=513). One percent  
 163 (1%) of the sample all three conditions (DM, HTN and overweight=104). Prevalence of all groups  
 164 of comorbidity was higher in males than females, except for group B (DM and overweight) (Figure  
 165 2). The prevalence of individual conditions and all comorbidities was higher amongst older  
 166 individuals, those with a 'College or higher' education, 'non-manual' workers, people in the richest  
 167 quintile for wealth index and those living in urban environments (Table 2).

168

| Variables                  | Diabetes<br>(%, 95% CI) | Hypertension<br>(%, 95% CI) | Overweight<br>(%, 95% CI) | Group-A<br>(%, 95% CI)<br>(Diabetes and<br>hypertension ) | Group-B<br>(%, 95% CI)<br>(Diabetes and<br>overweight) | Group-C<br>(%, 95% CI)<br>(Hypertension and<br>overweight) | Group-D<br>(%, 95% CI)<br>(Diabetes,<br>hypertension and<br>overweight) |
|----------------------------|-------------------------|-----------------------------|---------------------------|-----------------------------------------------------------|--------------------------------------------------------|------------------------------------------------------------|-------------------------------------------------------------------------|
| Age                        |                         |                             |                           |                                                           |                                                        |                                                            |                                                                         |
| Younger                    | 10.2 (9-11.5)           | 19.2 (17.4-21.1)            | 24.6 (22.7-26.5)          | 2.2 (1.7-2.9)                                             | 3.5 (2.8-4.4)                                          | 8.5 (7.4-9.8)                                              | 1.4 (1-2)                                                               |
| Older                      | 14.7 (12.9-16.7)        | 38.7 (36.3-41.2)            | 18 (16.2-20)              | 5 (4.1-6.1)                                               | 3.3 (2.5-4.3)                                          | 10.1 (8.8-11.5)                                            | 2.3 (1.6-3.2)                                                           |
| Education                  |                         |                             |                           |                                                           |                                                        |                                                            |                                                                         |
| Higher                     | 22 (18.7-25.8)          | 33.1 (29.4-37)              | 53.9 (49-58.8)            | 7.7 (5.6-10.6)                                            | 8.6 (6.4-11.4)                                         | 17.5 (14.5-21)                                             | 4.3 (2.8-6.5)                                                           |
| Secondary                  | 13.3 (11.4-15.4)        | 27.5 (24.9-30.3)            | 29.7 (26.4-33.2)          | 4.8 (3.7-6.1)                                             | 3.6 (2.6-4.8)                                          | 7.8 (6.3-9.8)                                              | 1.8 (1.1-2.9)                                                           |
| Primary                    | 11.6 (10.2-13.3)        | 23.6 (21.4-25.9)            | 21 (18.6-23.6)            | 3.2 (2.5-4.3)                                             | 2.5 (1.9-3.4)                                          | 7.1 (5.8-8.5)                                              | 1.2 (0.8-1.8)                                                           |
| No education,<br>preschool | 9.5 (8.3-10.8)          | 28 (26.1-30)                | 13.3 (11.9-15)            | 2.5 (1.9-3.1)                                             | 1.2 (0.9-1.8)                                          | 5.2 (4.4-6.1)                                              | 0.8 (0.5-1.3)                                                           |
| Occupation                 |                         |                             |                           |                                                           |                                                        |                                                            |                                                                         |
| Manual                     | 6.8 (5.6-8.2)           | 14.4 (12.7-16.3)            | 10.5 (9.2-12.1)           | 1 (0.6-1.6)                                               | 0.8 (0.4-1.3)                                          | 2.7 (2-3.5)                                                | 0.4 (0.2-0.9)                                                           |
| Non-manual                 | 13.4 (12.3-14.6)        | 31.5 (29.8-33.1)            | 27.7 (25.8-29.6)          | 4.3 (3.7-5)                                               | 3.2 (2.6-3.9)                                          | 8.8 (7.9-9.8)                                              | 1.7 (1.3-2.2)                                                           |
| Wealth index               |                         |                             |                           |                                                           |                                                        |                                                            |                                                                         |
| Poorest                    | 8.4 (6.9-10.2)          | 20.6 (18.3-23.1)            | 6.6 (5.2-8.5)             | 1.7 (1.1-2.6)                                             | 0.6 (0.3-1.4)                                          | 2.2 (1.5-3.3)                                              | 0.4 (0.1-1.1)                                                           |

169 **Table-2: Prevalence of individual conditions and comorbidities by characteristics**

|    |                           |                  |                  |                  |               |               |                  |               |
|----|---------------------------|------------------|------------------|------------------|---------------|---------------|------------------|---------------|
| 1  |                           |                  |                  |                  |               |               |                  |               |
| 2  |                           |                  |                  |                  |               |               |                  |               |
| 3  | Poorer                    | 8.1 (6.4-10.2)   | 22.6 (20-25.4)   | 10.4 (8.6-12.7)  | 1.7 (1-2.8)   | 0.5 (0.2-1.2) | 2.9 (2.1-4)      | 0.3 (0.1-0.9) |
| 4  |                           |                  |                  |                  |               |               |                  |               |
| 5  | Middle                    | 8.2 (6.7-9.9)    | 24.2 (21.9-26.6) | 14.6 (12.3-17.2) | 2 (1.3-2.9)   | 1 (0.5-1.8)   | 3.4 (2.5-4.7)    | 0.4 (0.2-1.1) |
| 6  |                           |                  |                  |                  |               |               |                  |               |
| 7  | Richer                    | 11.8 (9.9-14)    | 28.8 (26.4-31.3) | 27.8 (24.7-31.1) | 3.5 (2.6-4.7) | 2.5 (1.8-3.5) | 9.3 (7.9-11)     | 1.2 (0.7-1.9) |
| 8  |                           |                  |                  |                  |               |               |                  |               |
| 9  | Richest                   | 20.8 (18.6-23.3) | 38.6 (36.3-41.1) | 47.9 (44.8-51)   | 8.3 (6.8-10)  | 8 (6.5-9.8)   | 17.6 (15.6-19.7) | 4.3 (3.2-5.7) |
| 10 |                           |                  |                  |                  |               |               |                  |               |
| 11 | <b>Place of residence</b> |                  |                  |                  |               |               |                  |               |
| 12 |                           |                  |                  |                  |               |               |                  |               |
| 13 |                           |                  |                  |                  |               |               |                  |               |
| 14 | Urban                     | 16.5 (14.6-18.5) | 33.3 (31.1-35.5) | 37.4 (34.3-40.7) | 6 (4.9-7.3)   | 5.5 (4.4-6.8) | 12.9 (11.3-14.6) | 3.1 (2.3-4.2) |
| 15 |                           |                  |                  |                  |               |               |                  |               |
| 16 | Rural                     | 10.3 (9.3-11.3)  | 25.3 (23.5-27.1) | 17.1 (15.6-18.6) | 2.7 (2.2-3.3) | 1.7 (1.2-2.3) | 5.4 (4.7-6.3)    | 0.8 (0.5-1.3) |
| 17 |                           |                  |                  |                  |               |               |                  |               |

18 170

19

20

21

22

23

24

25

26

27

28

29

30

31

32

33

34

35

36

37

38

39

40

41

42

43  
44  
45  
46  
47

1  
2  
3 171 The prevalence ratio (PR), from modified Poisson regression models, of HTN, DM and  
4  
5 172 overweight was significantly higher among those who had completed higher education, those  
6  
7 173 living in urban areas, non-manual workers and those in the richer to richest socioeconomic status.  
8  
9 174 Although there was no sex disparities for diabetes, HTN and overweight was higher amongst  
10  
11 175 males. Overweight was the only condition that was significantly higher among younger  
12  
13 176 participants (Table 3).  
14  
15  
16  
17  
18  
19  
20  
21  
22  
23  
24  
25  
26  
27  
28  
29  
30  
31  
32  
33  
34  
35  
36  
37  
38  
39  
40  
41  
42  
43  
44  
45  
46  
47  
48  
49  
50  
51  
52  
53  
54  
55  
56  
57

177 **Table-3: Modified Poisson regression models showing prevalence ratios (PR) and 95% confidence intervals for diabetes,**  
 178 **hypertension and overweight by demographic characteristics among Bangladeshi adults**

| Variables               | Diabetes            | Hypertension        | Overweight          |
|-------------------------|---------------------|---------------------|---------------------|
|                         | PR (95% CI)         | PR (95% CI)         | PR (95% CI)         |
| <b>Sex</b>              |                     |                     |                     |
| Female                  | 0.89 (0.74-1.08)    | 0.59 (0.53-0.65) ** | 0.7 (0.62-0.79) **  |
| Male                    | Ref                 | Ref                 | Ref                 |
| <b>Age #</b>            |                     |                     |                     |
| Older                   | 1.48 (1.26-1.73) ** | 1.72 (1.56-1.88) ** | 0.75 (0.67-0.83) ** |
| Younger                 | Ref                 | Ref                 | Ref                 |
| <b>Education</b>        |                     |                     |                     |
| College or higher       | 1.71 (1.32-2.23) ** | 1.36 (1.15-1.61) ** | 2.11 (1.79-2.5) **  |
| Secondary               | 1.16 (0.92-1.48)    | 1.13 (0.99-1.28)    | 1.56 (1.34-1.83) ** |
| Primary                 | 1.21 (0.99-1.48)    | 0.97 (0.87-1.08)    | 1.29 (1.12-1.5) **  |
| No education, preschool | Ref                 | Ref                 | Ref                 |

|                           |                     |                     |                     |
|---------------------------|---------------------|---------------------|---------------------|
| <b>Occupation</b>         |                     |                     |                     |
| Non-manual###             | 1.54 (1.24-1.91) ** | 1.46 (1.28-1.68) ** | 1.62 (1.39-1.90) ** |
| Manual                    | Ref                 | Ref                 | Ref                 |
| <b>Wealth index</b>       |                     |                     |                     |
| Richest                   | 1.63 (1.25-2.14) ** | 1.49 (1.29-1.72) ** | 4.3 (3.32-5.57) **  |
| Richer                    | 1.04 (0.79-1.35)    | 1.24 (1.08-1.42) ** | 3.07 (2.39-3.95) ** |
| Middle                    | 0.77 (0.58-1.03)    | 1.05 (0.91-1.21)    | 1.8 (1.38-2.36) **  |
| Poorer                    | 0.94 (0.71-1.24)    | 1.01 (0.87-1.16)    | 1.45 (1.09-1.92) ** |
| Poorest                   | Ref                 | Ref                 | Ref                 |
| <b>Place of residence</b> |                     |                     |                     |
| Urban                     | 1.1 (0.92-1.32)     | 1.05 (0.95-1.15)    | 1.09 (0.98-1.21)    |
| Rural                     | Ref                 | Ref                 | Ref                 |

180 # Younger-(35–55 years and older (56 years or older) [23].

181 ##\*Non-manual category included sedentary workers, professionals (e.g., doctors, teachers, etc.), housewives, retired persons, those  
 182 unable to work and unemployed [24].

183 \*\*Statistical significance at  $p < 0.05$



1  
2  
3 184 In univariate Poisson regression models, those in the richest quintile of wealth index had the  
4  
5 185 highest PR for all comorbidity groups. These differences remained significant in all models in a  
6  
7  
8 186 stepwise process (**Supplementary Table 1**). In final models, once controlling for sex, age,  
9  
10 187 education, occupation and urbanization, those in the richest quintile were 2.3 times as likely to  
11  
12 188 have DM and HTN, 4.8 times as likely to have DM and overweight, 4.9 times as likely to have  
13  
14 189 HTN and overweight and 4.0 times as likely to have all three comorbidities, than those in the  
15  
16  
17 190 poorest quintile. In these final models, non-manual workers were also significantly more likely  
18  
19 191 than manual workers to have all comorbidity groups. Sex differences were lost on controlling for  
20  
21 192 other factor for all comorbidities groups, except Group C (HTN and overweight), for which  
22  
23  
24 193 females were 1.4 times as likely to experience both. Older participants were significantly more  
25  
26 194 likely to have group A comorbidity (DM and HTN) DM and Group D (all comorbidities) (Table  
27  
28  
29 195 4).

196 **Table-4: Modified stepwise Poisson regression models showing prevalence ratios (PR) and 95% confidence intervals for**  
 197 **comorbidities by demographic characteristics among Bangladeshi adults.**  
 198

| <b>Model</b>                                                                           | <b>Group-A<br/>(Diabetes and<br/>hypertension )</b> | <b>Group-B<br/>(Diabetes and<br/>overweight)</b> | <b>Group-C<br/>(Hypertension and<br/>overweight)</b> | <b>Group-D<br/>(Diabetes, hypertension and<br/>overweight)</b> |
|----------------------------------------------------------------------------------------|-----------------------------------------------------|--------------------------------------------------|------------------------------------------------------|----------------------------------------------------------------|
| <b>Model-1 (Wealth index )</b>                                                         |                                                     |                                                  |                                                      |                                                                |
| <i>Wealth index</i>                                                                    |                                                     |                                                  |                                                      |                                                                |
| Richest                                                                                | 3.94 (2.42-6.41)**                                  | 9.69 (4.84-19.4) **                              | 6.83 (4.66-10) **                                    | 8.67 (3.65-20.56) **                                           |
| Richer                                                                                 | 1.52 (0.88-2.61)                                    | 3.39 (1.61-7.16) **                              | 3.78 (2.53-5.64) **                                  | 2.44 (0.95-6.31)                                               |
| Middle                                                                                 | 0.9 (0.47-1.71)                                     | 1.63 (0.69-3.81)                                 | 1.3 (0.81-2.07)                                      | 1.17 (0.37-3.7)                                                |
| Poorer                                                                                 | 0.9 (0.47-1.73)                                     | 0.81 (0.31-2.16)                                 | 1.13 (0.7-1.84)                                      | 0.79 (0.24-2.64)                                               |
| Poorest                                                                                | Ref                                                 | Ref                                              | Ref                                                  | Ref                                                            |
| <b>Model-6 ( Wealth index + sex+ age + education+ occupation+ place of residence )</b> |                                                     |                                                  |                                                      |                                                                |
| <i>Wealth index</i>                                                                    |                                                     |                                                  |                                                      |                                                                |
| Richest                                                                                | 2.32 (1.32-4.1) **                                  | 4.84 (2.26-10.4) **                              | 4.85 (3.25-7.24) **                                  | 3.99 (1.58-10.11) **                                           |

|                         |                     |                  |                     |                     |
|-------------------------|---------------------|------------------|---------------------|---------------------|
| Richer                  | 1.12 (0.66-1.91)    | 2.22 (1.02-4.8)  | 3.03 (2.04-4.49)    | 1.59 (0.65-3.92)    |
| Middle                  | 0.74 (0.39-1.38)    | 1.23 (0.54-2.82) | 1.1 (0.69-1.75)     | 0.9 (0.31-2.64)     |
| Poorer                  | 0.78 (0.41-1.48)    | 0.71 (0.27-1.88) | 1.06 (0.65-1.7)     | 0.7 (0.22-2.24)     |
| Poorest                 | Ref                 | Ref              | Ref                 | Ref                 |
| <b>Sex</b>              |                     |                  |                     |                     |
| Female                  | 0.67 (0.35-1.31)    | 0.91 (0.47-1.78) | 1.44 (1.06-1.96) ** | 1.05 (0.46-2.36)    |
| Male                    | Ref                 | Ref              | Ref                 | Ref                 |
| <b>Age</b>              |                     |                  |                     |                     |
| Older                   | 2.17 (1.58-2.99) ** | 0.87 (0.62-1.21) | 1.11 (0.91-1.35)    | 1.61 (1.05-2.49) ** |
| Younger                 | Ref                 | Ref              | Ref                 | Ref                 |
| <b>Education</b>        |                     |                  |                     |                     |
| College or higher       | 1.38 (0.85-2.25)    | 1.53 (0.93-2.5)  | 1.09 (0.82-1.45)    | 1.4 (0.74-2.63)     |
| Secondary               | 1.06 (0.68-1.65)    | 1.33 (0.8-2.19)  | 0.91 (0.68-1.2)     | 1.24 (0.65-2.38)    |
| Primary                 | 1.03 (0.69-1.53)    | 1.42 (0.89-2.26) | 1.18 (0.93-1.5)     | 1.25 (0.69-2.28)    |
| No education, preschool | Ref                 | Ref              | Ref                 | Ref                 |
| <b>Occupational</b>     |                     |                  |                     |                     |

|                           |                     |                    |                     |                     |
|---------------------------|---------------------|--------------------|---------------------|---------------------|
| Non-manual                | 3.27 (1.94-5.52) ** | 4.22 (2.26-7.9) ** | 3.04 (2.19-4.22) ** | 3.69 (1.63-8.36) ** |
| Manual                    | Ref                 | Ref                | Ref                 | Ref                 |
| <i>Place of residence</i> |                     |                    |                     |                     |
| Urban                     | 1.33 (0.9-1.95)     | 1.17 (0.8-1.72)    | 1.04 (0.85-1.27)    | 1.72 (0.99-3.01)    |
| Rural                     | Ref                 | Ref                | Ref                 | Ref                 |

199

200 \*\* Statistical significance at  $p < 0.05$

## 201 **DISCUSSION**

202  
203 This is the first study in Bangladesh that investigated individual and comorbid conditions  
204 using a nationally representative sample. We found that within the Bangladesh adult population,  
205 aged more than 35 years, the prevalence of diabetes was 12%, hypertension 27% and overweight  
206 22%. Diabetes, hypertension and overweight were comparatively higher in males than females.  
207 More than 14% of the sample also had more than one condition, with 1.3% exhibiting all three.  
208 We also found that individual prevalence and comorbidity were higher in those of a higher  
209 socioeconomic status. Once controlling for several confounders, those in the richest quintile of  
210 wealth index were significantly more likely than those in the poorest quintile to exhibit  
211 comorbidities.

212 These findings demonstrate an alarming burden of NCDs within Bangladesh, with the rapid  
213 growth of overweight in the country becoming a particular public health concern.<sup>27-29</sup> As with  
214 many other developing countries, Bangladesh is experiencing a nutritional transition and increases  
215 in gross domestic product (GDP), which have been associated with multiple shifts in food intake  
216 and reduced physical activity.<sup>30</sup>

217 Although, to the authors knowledge, this is the first study on the prevalence of NCD  
218 risk factor comorbidity in Bangladesh using a nationally representative sample, a previous study  
219 had found an association between anthropometric indices such as body mass index (BMI), waist  
220 circumference (WC), waist hip ratio (WHR) and cardio metabolic risk indicators (FBG, SBP and  
221 DBP).<sup>31</sup> A further study in four geographical regions, including Bangladesh, reported that every  
222 standard deviation higher of BMI was associated with 1.65 and 1.60 times higher probability of

1  
2  
3 223 diabetes and 1.42 and 1.28 times higher probability of hypertension, for men and women,  
4  
5 224 respectively.<sup>32</sup> Other studies have also found that HTN is a common comorbid condition in DM,  
6  
7  
8 225 and vice versa,<sup>41</sup> whilst there is considerable evidence for an increased prevalence of HTN in  
9  
10 226 diabetic persons from other populations.<sup>33, 34</sup>

11  
12  
13 227 In the current study, overweight and diabetes risk was greater among young people  
14  
15 228 which is consistent with a similar study conducted in Indonesia.<sup>35</sup> Diabetes, hypertension and  
16  
17  
18 229 overweight were more prevalent in non-manual labor compared to manual labor, which was  
19  
20 230 similar to findings from a study in Barbados.<sup>36</sup> However, the present study found males were more  
21  
22 231 likely to suffer comorbidities than females, contradicting findings from previous studies.<sup>37,38</sup> We  
23  
24 232 also found that the prevalence of individual conditions (diabetes, hypertension and overweight)  
25  
26  
27 233 along with the comorbidity of them, was higher in urban areas compared to rural, which is  
28  
29 234 consistent with a number of studies conducted in developing countries, including Bangladesh.<sup>39-44</sup>

30  
31  
32 235 Within our study we found a higher prevalence of individual conditions and comorbidities  
33  
34 236 in higher socioeconomic groups. These findings conflict with trends reported by previous studies  
35  
36  
37 237 conducted in higher-income countries.<sup>45, 46</sup> However, another multi-country study reported that  
38  
39 238 comorbidity was more prevalent among the poor and less educated in low income countries.<sup>47</sup>  
40  
41 239 However, these findings were based on self-reported diagnosis, which may introduce concerns of  
42  
43 240 report and recall bias. Previous research in INDEPTH Asian sites has reported inverse associations  
44  
45  
46 241 between comorbidity and markers of socioeconomic status.<sup>48</sup>

47  
48  
49 242 The main implications of the present study are the increased burden of NCDs within  
50  
51 243 Bangladesh, along with other LMICs, and the patterning of more than one risk factor within  
52  
53  
54 244 individuals in the population. In contrast to findings from high income countries, prevalence of

1  
2  
3 245 individual risk factors and comorbidities was higher in higher SES groups. This points to  
4  
5 246 differences between countries in the population level determinants of NCDs and highlights that  
6  
7 247 context specific interventions must be developed to counter them. As a first step, it is important  
8  
9 248 that countries collect and analyse high quality health data to allow them to develop and target  
10  
11 249 interventions.  
12  
13  
14  
15  
16  
17  
18

250

## 19 251 **STRENGTHS AND LIMITATIONS**

22 252 The main strengths of the study were the large nationally representative sample and the  
23  
24 253 collection of blood pressure, blood glucose concentration, body weight, and height measurements  
25  
26 254 by health technicians follow standard methods, including biomarker analysis, along with validated  
27  
28 255 measures of socio-economic status. The main weakness of the study is the cross-sectional nature,  
29  
30 256 meaning that only associations can be inferred and causality cannot be determined. In addition  
31  
32 257 although clinical measures of diabetes, hypertension and overweight were taken, no measurements  
33  
34 258 of blood lipids were taken in the survey, meaning that metabolic syndrome could not be  
35  
36 259 investigated. Waist and hip circumference were also not collected, limiting the analysis that could  
37  
38 260 be performed. Finally although the study was reported to be representative, only participants 35  
39  
40 261 years or older had measured anthropometry and biomarkers meaning that the findings reflect this  
41  
42 262 population of adults in the country.  
43  
44  
45  
46  
47  
48  
49  
50

263

## 51 264 **CONCLUSION**

52

53

54

55

56

57

58

59

60

1  
2  
3 265 In contrast to more affluent countries, individuals of higher socio-economic status in  
4  
5 266 Bangladesh are more likely to exhibit NCD risk factors and comorbidities than individuals from  
6  
7  
8 267 with lower SES status. It is important that we identify the patterning of these conditions within  
9  
10 268 countries if we are to develop effective public health approaches contextualized to the population.  
11  
12 269 This can be done through improved monitoring and surveillance of NCDs, linked to primary care  
13  
14 270 programmes. Such approaches also need policy and system changes, supported by “political will”,  
15  
16 271 societal and community support.  
17  
18  
19 272  
20  
21

## 22 273 **Contributors**

23  
24  
25 274 TB, NT, SKD & AAM conceptualized the study. TB, NT, SKD, RDG & AAM designed the study  
26  
27 and acquired the data. TB, SI & MRI conducted the data analysis. TB, NT, SI, MRI, SKD & AAM  
28 275 interpreted the data. TB, NT & RDG prepared the first draft. TB, NT, SKD & AAM participated  
29  
30 276 in critical revision of the manuscript and contributed to its intellectual improvement. All authors  
31  
32 277 went through the final draft and approved it for submission.  
33  
34  
35  
36  
37  
38 279  
39  
40

## 41 280 **Funding**

42  
43  
44 281 None.  
45  
46  
47 282  
48  
49

## 50 283 **Acknowledgments**



1  
2  
3 284 The authors thank MEASURE DHS for permission to use data from the 2011  
4  
5 285 Bangladesh DHS. The authors are also grateful to Mr. Mehedi Hasan, PhD student, University of  
6  
7  
8 286 Queensland, Australia.  
9

10  
11 287 **Competing Interests**  
12

13  
14 288 None declared.  
15

16  
17 289  
18  
19

20 290 **Patient consent**  
21

22  
23 291 None Declared  
24  
25

26  
27 292  
28

29 293 **Disclaimer**  
30

31 294 The authors are alone responsible for the integrity and accuracy of data analysis and the writing  
32  
33 295 the manuscript.  
34  
35

36 296  
37  
38

39 297 **Ethics approval**  
40

41  
42 298 The datasets were obtained from DHS Programme with proper procedure. The study exempt from  
43  
44 299 collecting ethical approval because the survey protocols were reviewed and approved by ICF  
45  
46 300 Macro Institutional Review Board, Maryland, USA and National Research Ethics Committee of  
47  
48 301 Bangladesh Medical Research Council (BMRC), Dhaka, Bangladesh.  
49  
50

51  
52  
53 302  
54  
55  
56  
57

1  
2  
3 303 **Data sharing statement**  
4  
5

6 304 The dataset of BDHS 2011 is available at the Demographic and Health Surveys Program. Extra  
7  
8  
9 305 data is available which is available on request at [http://dhsprogram-com/what-we-](http://dhsprogram-com/what-we-do/survey/survey-display-349.cfm)  
10  
11 306 [do/survey/survey-display-349.cfm](http://dhsprogram-com/what-we-do/survey/survey-display-349.cfm).  
12  
13

14 307  
15

16  
17 308  
18  
19  
20  
21  
22  
23  
24  
25  
26  
27  
28  
29  
30  
31  
32  
33  
34  
35  
36  
37  
38  
39  
40  
41  
42  
43  
44  
45  
46  
47  
48  
49  
50  
51  
52  
53  
54  
55  
56  
57

**References:**

1. Murray CJ, Vos T, Lozano R, et al. Disability-adjusted life years (DALYs) for 291 diseases and injuries in 21 regions, 1990–2010: a systematic analysis for the Global Burden of Disease Study 2010. *Lancet*. 2013;380(9859):2197-223. doi: 10.1016/S0140-6736(12)61689-4.
2. Lozano R, Naghavi M, Foreman K, et al. Global and regional mortality from 235 causes of death for 20 age groups in 1990 and 2010: a systematic analysis for the Global Burden of Disease Study 2010. *Lancet*. 2013;380(9859):2095-128. doi: 10.1016/S0140-6736(12)61728-0
3. Bennett D, Bisanzio D, Deribew A, et al. Global, regional, and national under-5 mortality, adult mortality, age-specific mortality, and life expectancy, 1970–2016: a systematic analysis for the Global Burden of Disease Study 2016. *Lancet*. 2017;390(10100):1084-1150. doi: 10.1016/s0140-6736(17)31833-0.
4. World Health Organization. Global status report on noncommunicable diseases 2010. Geneva: World Health Organization; 2011. 161 p.
5. Abegunde DO, Mathers CD, Adam T, et al. The burden and costs of chronic diseases in low-income and middle-income countries. *Lancet*. 2007;370(9603):1929-38. doi: 10.1016/S0140-6736(07)61696-1
6. Lee JT, Hamid F, Pati S, et al. Impact of noncommunicable disease multimorbidity on healthcare utilisation and out-of-pocket expenditures in middle-income countries: cross sectional analysis. *PLoS One*. 2015;10(7):e0127199. doi: 10.1371/journal.pone.0127199.
7. World Health Organization. Global status report on noncommunicable diseases 2014. Geneva: World Health Organization; 2015. 280 p.
8. Streatfield PK, Karar ZA. Population challenges for Bangladesh in the coming decades. *J Health Popul Nutr*. 2008;26(3):261.

- 1  
2  
3 332 9. National Institute of Population Research and Training (NIPORT), Mitra and Associates,  
4  
5 333 ICF International. Bangladesh Urban Health Survey 2013.. Dhaka, Bangladesh, Calverton,  
6  
7 334 Maryland, USA: NIPORT, Mitra and Associates, and ICF International., 2015.  
8  
9  
10 335 10. Ahsan KZ, Alam MN, Streatfield PK, et al. Has Bangladesh Entered the Fourth Stage of  
11  
12 336 the Epidemiologic Transition?. Proceedings of the International seminar on Mortality: Past,  
13  
14 337 Present and Future; 2017Aug 7-8; the University of Campinas, Brazil.  
15  
16  
17 338 11. Zaman MM, Bhuiyan MR, Karim MN, et al. Clustering of non-communicable diseases risk  
18  
19 339 factors in Bangladeshi adults: an analysis of STEPS survey 2013. *BMC Public Health*.  
20  
21 340 2015;15(1):659. doi: 10.1186/s12889-015-1938-4.  
22  
23  
24 341 12. Hillas G, Perlikos F, Tsiligianni I, et al. Managing comorbidities in COPD. *Int J Chron*  
25  
26 342 *Obstruct Pulmon Dis*.2015;10:95. doi: 10.2147/COPD.S54473.  
27  
28  
29 343 13. Roberts KC, Rao DP, Bennett TL, et al. Prevalence and patterns of chronic disease  
30  
31 344 multimorbidity and associated determinants in Canada. *Health Promot Chronic Dis Prev*  
32  
33 345 *Can*. 2015 ;35(6):87-94.  
34  
35  
36 346 14. Wang J, Ma JJ, Liu J, et al. Prevalence and Risk Factors of Comorbidities among  
37  
38 347 Hypertensive Patients in China. *Int J Med Sci*. 2017;14(3):201. doi: 10.7150/ijms.16974.  
39  
40  
41 348 15. Hurst C, Thinkhamrop B. The association between hypertension comorbidity and  
42  
43 349 microvascular complications in type 2 diabetes patients: A nationwide cross-sectional study in  
44  
45 350 Thailand. *Diabetes Metab J*. 2015;39(5):395-404. doi: 10.4093/dmj.2015.39.5.395  
46  
47  
48 351 19. Allen L, Williams J, Townsend N, et al. Socioeconomic status and non-communicable  
49  
50 352 disease behavioural risk factors in low-income and lower-middle-income countries: a systematic  
51  
52 353 review. *Lancet Glob Health*. 2017;5(3):e277-e89. doi: 10.1016/S2214-109X(17)30058-X.  
53  
54  
55  
56  
57

- 1  
2  
3 354 20. Varghese C. Reducing premature mortality from non-communicable diseases, including  
4  
5 355 for people with severe mental disorders. *World Psychiatry*. 2017;16(1):45-7. doi:  
6  
7 356 10.1002/wps.20376.  
8  
9  
10 357 21. National Institute of Population Research and Training (NIPORT), Mitra and Associates,  
11  
12 358 ICF International. Bangladesh Demographic and Health Survey 2011, Preliminary Report. Dhaka,  
13  
14 359 Bangladesh, Calverton, Maryland, USA: NIPORT, Mitra and Associates, and ICF International.,  
15  
16 360 2012.  
17  
18  
19 361 22. Biswas T, Islam MS, Linton N, et al. Socio-economic inequality of chronic non-  
20  
21 362 communicable diseases in Bangladesh. *PloS One*. 2016;11(11):e0167140. doi:  
22  
23 363 10.1371/journal.pone.0167140.  
24  
25  
26 364 23. Akter S, Rahman MM, Abe SK, et al. Prevalence of diabetes and prediabetes and their risk  
27  
28 365 factors among Bangladeshi adults: a nationwide survey. *Bull World Health Organ*.  
29  
30 366 2014;92(3):204-13A. doi: 10.2471/BLT.13.128371.  
31  
32  
33 367 24. Ke-You G, Da-Wei F. The magnitude and trends of under-and over-nutrition in Asian  
34  
35 368 countries. *Biomed Environ Sci*. 2001;14(1-2):53-60.  
36  
37  
38 369 25. National Institute of Population Research and Training (NIPORT), Mitra and Associates,  
39  
40 370 ICF International. Bangladesh Demographic and Health Survey 2011. Dhaka, Bangladesh,  
41  
42 371 Calverton, Maryland, USA: NIPORT, Mitra and Associates, and ICF International., 2013.  
43  
44  
45 372 26. Rahman M, Williams G, Al Mamun A. Hypertension and diabetes prevalence among adults  
46  
47 373 with moderately increased BMI (23· 0–24· 9 kg/m<sup>2</sup>): findings from a nationwide survey in  
48  
49 374 Bangladesh. *Public Health Nutr*. 2017:1-8. doi: 10.1017/S1368980016003566.  
50  
51  
52  
53  
54  
55  
56  
57

- 1  
2  
3 375 27. Biswas T, Uddin MJ, Al Mamun A, et al. Increasing prevalence of overweight and obesity  
4  
5 376 in Bangladeshi women of reproductive age: Findings from 2004 to 2014. *PloS One*.  
6  
7 377 2017;12(7):e0181080. doi: 10.1371/journal.pone.0181080.  
8  
9  
10 378 28. Hoque ME, Hasan MT, Rahman M, et al. Double burden of underweight and overweight  
11  
12 379 among Bangladeshi adults differs between men and women: evidence from a nationally  
13  
14 380 representative survey. *Public Health Nutr.*2017;20(12):2183-91. doi:  
15  
16 381 10.1017/S1368980017000957.  
17  
18  
19 382 29. Biswas T, Garnett SP, Pervin S, et al. The prevalence of underweight, overweight and  
20  
21 383 obesity in Bangladeshi adults: Data from a national survey. *PloS One*. 2017;12(5):e0177395. doi:  
22  
23 384 10.1371/journal.pone.0177395.  
24  
25  
26 385 30. Dietz WH. Double-duty solutions for the double burden of malnutrition. *Lancet*. 2017. doi:  
27  
28 386 10.1016/S0140-6736(17)32479-0.  
29  
30  
31 387 31. Bhowmik B, Afsana F, Ahmed T, et al. Obesity and associated type 2 diabetes and  
32  
33 388 hypertension in factory workers of Bangladesh. *BMC Res Notes*.2015;8(1):460. doi:  
34  
35 389 10.1186/s13104-015-1377-4.  
36  
37  
38 390 32. Pradeepa R. The rising burden of diabetes and hypertension in southeast asian and african  
39  
40 391 regions: need for effective strategies for prevention and control in primary health care settings. *Int*  
41  
42 392 *J Hypertens*. 2013;2013. doi: 10.1155/2013/409083.  
43  
44  
45 393 33. Berraho M, El Achhab Y, Benslimane A, et al. Hypertension and type 2 diabetes: a cross-  
46  
47 394 sectional study in Morocco (EPIDIAM Study). *Pan Afr Med J*. 2012;11(1).  
48  
49 395 34. Hashemizadeh H, Sarvelayati D. Hypertension and Type 2 Diabetes: A Cross-sectional  
50  
51 396 Study in Hospitalized Patients in Quchan, Iran. *Iran J Diabetes Obesity*. 2013;5(1):21-6.  
52  
53  
54  
55  
56  
57

- 1  
2  
3 397 35. Hussain MA, Huxley RR, Al Mamun A. Multimorbidity prevalence and pattern in  
4  
5 398 Indonesian adults: an exploratory study using national survey data. *BMJ Open*.  
6  
7 399 2015;5(12):e009810. doi: 10.1136/bmjopen-2015-009810.  
8  
9  
10 400 36. Howitt C, Hambleton IR, Rose AM, et al. Social distribution of diabetes, hypertension and  
11  
12 401 related risk factors in Barbados: a cross-sectional study. *BMJ Open*. 2015;5(12):e008869. doi:  
13  
14 402 10.1136/bmjopen-2015-008869.37. Pearson TA. Education and income: double-edged swords in  
15  
16 403 the epidemiologic transition of cardiovascular disease. *Ethn Dis*. 2003;13(2; SUPP/2):S2-158.  
17  
18  
19 404 38. Agborsangaya CB, Lau D, Lahtinen M, et al. Multimorbidity prevalence and patterns  
20  
21 405 across socioeconomic determinants: a cross-sectional survey. *BMC Public Health*.  
22  
23 406 2012;12(1):201. doi: 10.1186/1471-2458-12-201.  
24  
25  
26 407 39. Rahman M, Williams G, Al Mamun A. Gender differences in hypertension awareness,  
27  
28 408 antihypertensive use and blood pressure control in Bangladeshi adults: findings from a national  
29  
30 409 cross-sectional survey. *J Health Popul Nutr*.2017;36(1):23. doi: 10.1186/s41043-017-0101-5.  
31  
32  
33 410 40. Li G, Hu H, Dong Z, et al. Urban and suburban differences in hypertension trends and self-  
34  
35 411 care: Three population-based cross-sectional studies from 2005-2011. *PloS One*.  
36  
37 412 2015;10(2):e0117999. doi: 10.1371/journal.pone.0117999.  
38  
39  
40 413 41. Sola A, Chinyere O, Stephen A, et al. Hypertension prevalence in an urban and rural area  
41  
42 414 of Nigeria. *J Med Sci*. 2013;4:149-54.  
43  
44  
45 415 42. Dhungana RR, Pandey AR, Bista B, et al. Prevalence and associated factors of  
46  
47 416 hypertension: a community-based cross-sectional study in municipalities of Kathmandu, Nepal.  
48  
49 417 *Int J Hypertens*.2016;2016. doi: 10.1155/2016/1656938.  
50  
51  
52  
53  
54  
55  
56  
57

- 1  
2  
3 418 43. Chowdhury MAB, Uddin MJ, Haque MR, et al. Hypertension among adults in Bangladesh:  
4  
5 419 evidence from a national cross-sectional survey. *BMC Cardiovasc Disord.* 2016;16(1):22. doi:  
6  
7 420 10.1186/s12872-016-0197-3.  
8  
9  
10 421 44. Akter S, Rahman MM, Abe SK, et al. Prevalence of diabetes and prediabetes and their risk  
11  
12 422 factors among Bangladeshi adults: a nationwide survey. *Bull World Health*  
13  
14 423 *Organ.*2014;92(3):204-13A. doi: 10.2471/BLT.13.128371  
15  
16  
17 424 45. Connolly V, Unwin N, Sherriff P, et al. Diabetes prevalence and socioeconomic status: a  
18  
19 425 population based study showing increased prevalence of type 2 diabetes mellitus in deprived areas.  
20  
21 426 *J Epidemiol Community Health.*2000;54(3):173-7.  
22  
23  
24 427 46. Glover JD, Hetzel DM, Tennant SK. The socioeconomic gradient and chronic illness and  
25  
26 428 associated risk factors in Australia. *Aust New Zealand Health Policy.* 2004;1(1):8. doi:  
27  
28 429 10.1186/1743-8462-1-8.  
29  
30  
31 430 47. Hosseinpoor AR, Bergen N, Mendis S, et al. Socioeconomic inequality in the prevalence  
32  
33 431 of noncommunicable diseases in low-and middle-income countries: results from the World Health  
34  
35 432 Survey. *BMC Public Health.* 2012;12(1):474. doi: 10.1186/s12889-015-2227-y.  
36  
37  
38 433 48. Van Minh H, Ng N, Juvekar S, et al. Self-reported prevalence of chronic diseases and their  
39  
40 434 relation to selected sociodemographic variables: a study in INDEPTH Asian sites, 2005. *Prev*  
41  
42 435 *Chronic Dis.*2008;5(3).  
43  
44  
45  
46  
47  
48  
49  
50  
51  
52  
53  
54  
55  
56  
57



1  
2  
3 **436 Figures:**  
4

5  
6 **437 Fig 1.** Scatter plot between age with blood glucose, systolic blood pressure, diastolic blood  
7  
8 **438** pressure and BMI.  
9

10 **439 Fig 2.** Prevalence of diabetes, hypertension, overweight and comorbidity by sex among  
11  
12 **440 Bangladeshi adults**  
13

14  
15  
16 **441**  
17

18  
19 **442 Supplementary Materials:**  
20

21  
22 **443** Supplementary Table 1: Modified stepwise Poisson regression models showing prevalence ratios  
23  
24 **444** (PR) and 95% confidence intervals for comorbidities by demographic characteristics among  
25  
26 **445** Bangladeshi adults.  
27  
28  
29  
30  
31  
32  
33  
34  
35  
36  
37  
38  
39  
40  
41  
42  
43  
44  
45  
46  
47  
48  
49  
50  
51  
52  
53  
54  
55  
56  
57

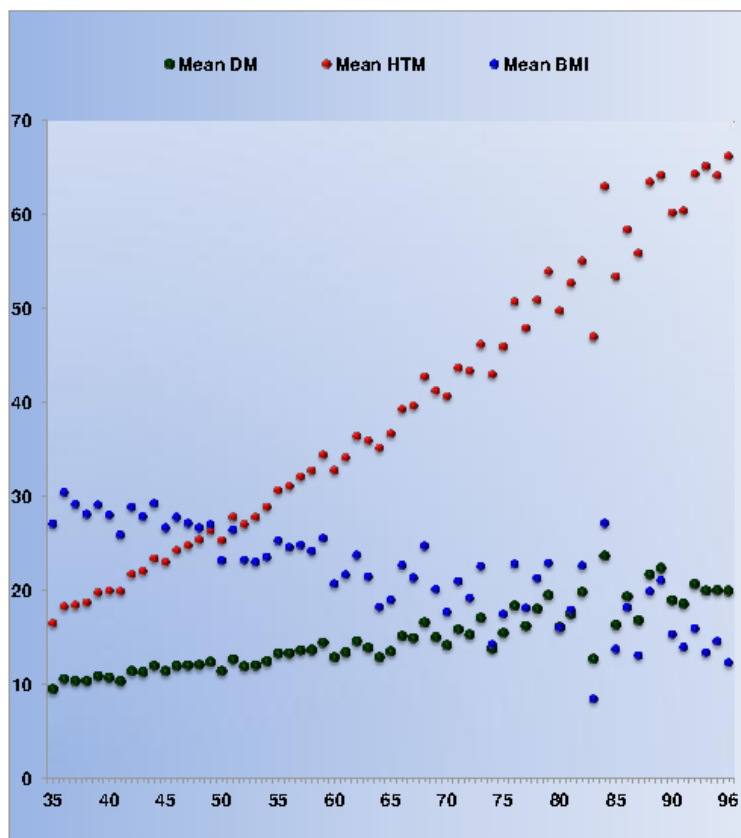

Predictive probability of diabetes, hypertension and BMI by age

215x279mm (72 x 72 DPI)

1  
2  
3  
4  
5  
6  
7  
8  
9  
10  
11  
12  
13  
14  
15  
16  
17  
18  
19  
20  
21  
22  
23  
24  
25  
26  
27  
28  
29  
30  
31  
32  
33  
34  
35  
36  
37  
38  
39  
40  
41  
42  
43  
44  
45  
46  
47  
48  
49  
50  
51  
52  
53  
54  
55  
56  
57  
58  
59  
60

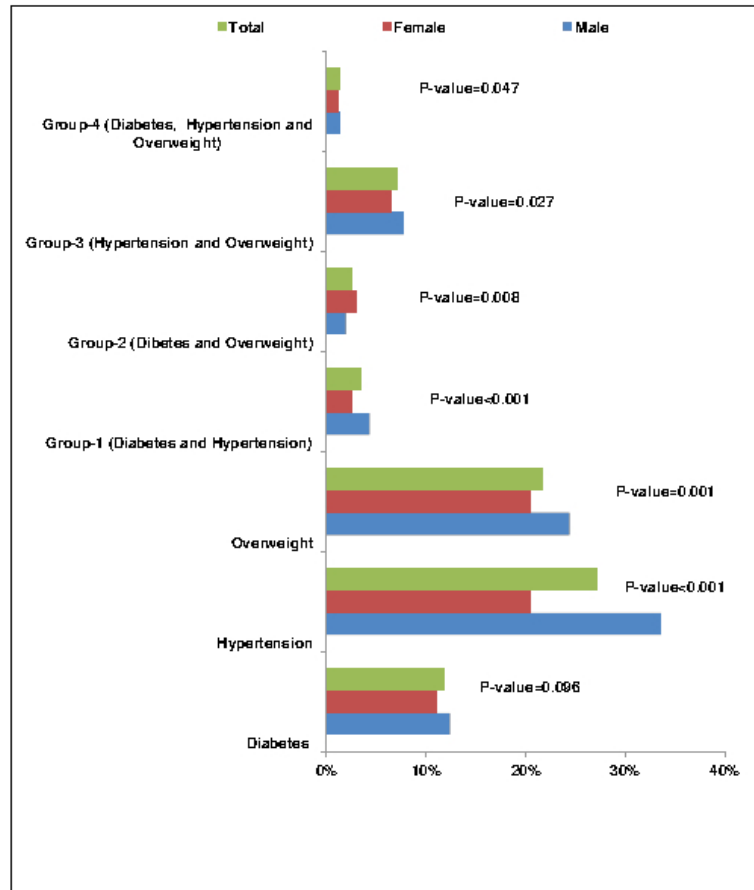

Prevalence of diabetes, hypertension, overweight and co-morbidity by sex among Bangladeshi adults

215x279mm (72 x 72 DPI)

**Supplementary Table 1: Modified stepwise Poisson regression models showing prevalence ratios (PR) and 95% confidence intervals for co-morbidities by demographic characteristics among Bangladeshi adults.**

|                                                       | <b>Group-A<br/>(Diabetes and hypertension )</b> | <b>Group-B<br/>(Diabetes and overweight)</b> | <b>Group-C<br/>(Hypertension and overweight)</b> | <b>Group-D<br/>(Diabetes, hypertension and overweight)</b> |
|-------------------------------------------------------|-------------------------------------------------|----------------------------------------------|--------------------------------------------------|------------------------------------------------------------|
| <b>Model-1 (Wealth index )</b>                        |                                                 |                                              |                                                  |                                                            |
| <i>Wealth index</i>                                   |                                                 |                                              |                                                  |                                                            |
| Richest                                               | 3.94 (2.42-6.41)**                              | 9.69 (4.84-19.4) **                          | 6.83 (4.66-10) **                                | 8.67 (3.65-20.56) **                                       |
| Richer                                                | 1.52 (0.88-2.61)                                | 3.39 (1.61-7.16) **                          | 3.78 (2.53-5.64) **                              | 2.44 (0.95-6.31)                                           |
| Middle                                                | 0.9 (0.47-1.71)                                 | 1.63 (0.69-3.81)                             | 1.3 (0.81-2.07)                                  | 1.17 (0.37-3.7)                                            |
| Poorer                                                | 0.9 (0.47-1.73)                                 | 0.81 (0.31-2.16)                             | 1.13 (0.7-1.84)                                  | 0.79 (0.24-2.64)                                           |
| Poorest                                               | Ref                                             | Ref                                          | Ref                                              | Ref                                                        |
| <b>Model-2 (Wealth index + sex)</b>                   |                                                 |                                              |                                                  |                                                            |
| <i>Wealth index</i>                                   |                                                 |                                              |                                                  |                                                            |
| Richest                                               | 3.93 (2.42-6.39) **                             | 9.68 (4.84-19.35) **                         | 6.88 (4.7-10.08) **                              | 8.69 (3.68-20.5) **                                        |
| Richer                                                | 1.51 (0.88-2.6)                                 | 3.39 (1.61-7.14) **                          | 3.82 (2.56-5.69) **                              | 2.45 (0.96-6.3)                                            |
| Middle                                                | 0.9 (0.47-1.71)                                 | 1.62 (0.69-3.8)                              | 1.31 (0.82-2.09)                                 | 1.17 (0.37-3.69)                                           |
| Poorer                                                | 0.89 (0.47-1.71)                                | 0.81 (0.31-2.15)                             | 1.16 (0.72-1.89)                                 | 0.8 (0.24-2.63)                                            |
| Poorest                                               | Ref                                             | Ref                                          | Ref                                              | Ref                                                        |
| <i>Sex</i>                                            |                                                 |                                              |                                                  |                                                            |
| Female                                                | 0.85 (0.43-1.66)                                | 0.95 (0.49-1.85)                             | 1.66 (1.22-2.26) **                              | 1.21 (0.53-2.74)                                           |
| Male                                                  | Ref                                             | Ref                                          | Ref                                              | Ref                                                        |
| <b>Model-3 (Wealth index + sex+ age )</b>             |                                                 |                                              |                                                  |                                                            |
| <i>Wealth index</i>                                   |                                                 |                                              |                                                  |                                                            |
| Richest                                               | 4.04 (2.49-6.56) **                             | 9.65 (4.82-19.3) **                          | 6.92 (4.73-10.13) **                             | 8.82 (3.74-20.82) **                                       |
| Richer                                                | 1.51 (0.88-2.59)                                | 3.4 (1.61-7.14) **                           | 3.81 (2.55-5.67) **                              | 2.44 (0.95-6.26)                                           |
| Middle                                                | 0.88 (0.46-1.67)                                | 1.63 (0.7-3.81)                              | 1.3 (0.81-2.07)                                  | 1.15 (0.37-3.65)                                           |
| Poorer                                                | 0.86 (0.45-1.64)                                | 0.82 (0.31-2.15)                             | 1.15 (0.71-1.87)                                 | 0.78 (0.24-2.57)                                           |
| Poorest                                               | Ref                                             | Ref                                          | Ref                                              | Ref                                                        |
| <i>Sex</i>                                            |                                                 |                                              |                                                  |                                                            |
| Female                                                | 0.75 (0.39-1.46)                                | 0.97 (0.5-1.88)                              | 1.61 (1.18-2.19) **                              | 1.13 (0.5-2.54)                                            |
| Male                                                  | Ref                                             | Ref                                          | Ref                                              | Ref                                                        |
| <i>Age</i>                                            |                                                 |                                              |                                                  |                                                            |
| Older                                                 | 2.34 (1.71-3.2) **                              | 0.88 (0.65-1.2)                              | 1.23 (1.03-1.47) **                              | 1.6 (1.05-2.42) **                                         |
| Younger                                               | Ref                                             | Ref                                          | Ref                                              | Ref                                                        |
| <b>Model-4 (Wealth index + sex+ age + education )</b> |                                                 |                                              |                                                  |                                                            |
| <i>Wealth index</i>                                   |                                                 |                                              |                                                  |                                                            |
| Richest                                               | 3.62 (2.16-6.07) **                             | 7.84 (3.74-16.45) **                         | 6.76 (4.55-10.03) **                             | 7.56 (3.11-18.42) **                                       |
| Richer                                                | 1.45 (0.84-2.51)                                | 2.98 (1.37-6.5)                              | 3.77 (2.53-5.63) **                              | 2.24 (0.87-5.8)                                            |
| Middle                                                | 0.87 (0.46-1.64)                                | 1.5 (0.65-3.5)                               | 1.28 (0.81-2.05)                                 | 1.1 (0.36-3.36)                                            |

|                                                                                        |                     |                     |                     |                      |
|----------------------------------------------------------------------------------------|---------------------|---------------------|---------------------|----------------------|
| Poorer                                                                                 | 0.85 (0.45-1.63)    | 0.78 (0.29-2.09)    | 1.15 (0.71-1.86)    | 0.77 (0.23-2.51)     |
| Poorest                                                                                | Ref                 | Ref                 | Ref                 | Ref                  |
| <b>Sex</b>                                                                             |                     |                     |                     |                      |
| Female                                                                                 | 0.76 (0.39-1.49)    | 1.04 (0.53-2.05)    | 1.62 (1.18-2.22) ** | 1.19 (0.52-2.71)     |
| Male                                                                                   | Ref                 | Ref                 | Ref                 | Ref                  |
| <b>Age</b>                                                                             |                     |                     |                     |                      |
| Older                                                                                  | 2.45 (1.79-3.36) ** | 0.97 (0.7-1.34)     | 1.25 (1.04-1.51) ** | 1.72 (1.11-2.65) **  |
| Younger                                                                                | Ref                 | Ref                 | Ref                 | Ref                  |
| <b>Education</b>                                                                       |                     |                     |                     |                      |
| College or higher                                                                      | 1.54 (0.96-2.5)     | 1.73 (1.06-2.83) ** | 1.21 (0.91-1.61)    | 1.59 (0.85-2.97)     |
| Secondary                                                                              | 0.97 (0.62-1.51)    | 1.22 (0.74-2.01)    | 0.84 (0.64-1.12)    | 1.12 (0.59-2.15)     |
| Primary                                                                                | 0.96 (0.64-1.42)    | 1.35 (0.85-2.14)    | 1.13 (0.9-1.43)     | 1.17 (0.65-2.11)     |
| No education, preschool                                                                | Ref                 | Ref                 | Ref                 | Ref                  |
| <b>Model-5 ( Wealth index + sex+ age + education+ occupation )</b>                     |                     |                     |                     |                      |
| <b>Wealth index</b>                                                                    |                     |                     |                     |                      |
| Richest                                                                                | 2.72 (1.6-4.61) **  | 5.3 (2.54-11.05) ** | 4.97 (3.37-7.33) ** | 5.47 (2.32-12.91) ** |
| Richer                                                                                 | 1.18 (0.69-2.04)    | 2.29 (1.06-4.95) ** | 3.06 (2.06-4.53) ** | 1.79 (0.71-4.49)     |
| Middle                                                                                 | 0.75 (0.4-1.41)     | 1.24 (0.54-2.85)    | 1.11 (0.7-1.76)     | 0.93 (0.31-2.76)     |
| Poorer                                                                                 | 0.78 (0.41-1.49)    | 0.72 (0.27-1.88)    | 1.06 (0.65-1.7)     | 0.7 (0.22-2.26)      |
| Poorest                                                                                | Ref                 | Ref                 | Ref                 | Ref                  |
| <b>Sex</b>                                                                             |                     |                     |                     |                      |
| Female                                                                                 | 0.67 (0.35-1.31)    | 0.91 (0.47-1.78)    | 1.44 (1.06-1.96) ** | 1.05 (0.47-2.37)     |
| Male                                                                                   | Ref                 | Ref                 | Ref                 | Ref                  |
| <b>Age</b>                                                                             |                     |                     |                     |                      |
| Older                                                                                  | 2.13 (1.54-2.94) ** | 0.86 (0.62-1.19)    | 1.11 (0.91-1.34)    | 1.54 (1.00-2.38) **  |
| Younger                                                                                | Ref                 | Ref                 | Ref                 | Ref                  |
| <b>Education</b>                                                                       |                     |                     |                     |                      |
| College or higher                                                                      | 1.4 (0.86-2.28)     | 1.54 (0.94-2.51)    | 1.09 (0.82-1.45)    | 1.44 (0.77-2.71)     |
| Secondary                                                                              | 1.05 (0.67-1.64)    | 1.32 (0.8-2.18)     | 0.9 (0.68-1.2)      | 1.22 (0.63-2.35)     |
| Primary                                                                                | 1.03 (0.69-1.53)    | 1.41 (0.89-2.25)    | 1.18 (0.93-1.49)    | 1.24 (0.68-2.26)     |
| No education, preschool                                                                | Ref                 | Ref                 | Ref                 | Ref                  |
| <b>Occupational</b>                                                                    |                     |                     |                     |                      |
| Non-manual                                                                             | 3.32 (1.97-5.59) ** | 4.25 (2.27-7.97) ** | 3.04 (2.19-4.23) ** | 3.79 (1.67-8.61) **  |
| Manual                                                                                 | Ref                 | Ref                 | Ref                 | Ref                  |
| <b>Model-5 ( Wealth index + sex+ age + education+ occupation+ place of residence )</b> |                     |                     |                     |                      |
| <b>Wealth index</b>                                                                    |                     |                     |                     |                      |
| Richest                                                                                | 2.32 (1.32-4.1) **  | 4.84 (2.26-10.4) ** | 4.85 (3.25-7.24) ** | 3.99 (1.58-10.11) ** |
| Richer                                                                                 | 1.12 (0.66-1.91)    | 2.22 (1.02-4.8)     | 3.03 (2.04-4.49)    | 1.59 (0.65-3.92)     |
| Middle                                                                                 | 0.74 (0.39-1.38)    | 1.23 (0.54-2.82)    | 1.1 (0.69-1.75)     | 0.9 (0.31-2.64)      |
| Poorer                                                                                 | 0.78 (0.41-1.48)    | 0.71 (0.27-1.88)    | 1.06 (0.65-1.7)     | 0.7 (0.22-2.24)      |

|                           |                     |                    |                     |                     |
|---------------------------|---------------------|--------------------|---------------------|---------------------|
| Poorest                   | Ref                 | Ref                | Ref                 | Ref                 |
| <b>Sex</b>                |                     |                    |                     |                     |
| Female                    | 0.67 (0.35-1.31)    | 0.91 (0.47-1.78)   | 1.44 (1.06-1.96) ** | 1.05 (0.46-2.36)    |
| Male                      | Ref                 | Ref                | Ref                 | Ref                 |
| <b>Age</b>                |                     |                    |                     |                     |
| Older                     | 2.17 (1.58-2.99) ** | 0.87 (0.62-1.21)   | 1.11 (0.91-1.35)    | 1.61 (1.05-2.49) ** |
| Younger                   | Ref                 | Ref                | Ref                 | Ref                 |
| <b>Education</b>          |                     |                    |                     |                     |
| College or higher         | 1.38 (0.85-2.25)    | 1.53 (0.93-2.5)    | 1.09 (0.82-1.45)    | 1.4 (0.74-2.63)     |
| Secondary                 | 1.06 (0.68-1.65)    | 1.33 (0.8-2.19)    | 0.91 (0.68-1.2)     | 1.24 (0.65-2.38)    |
| Primary                   | 1.03 (0.69-1.53)    | 1.42 (0.89-2.26)   | 1.18 (0.93-1.5)     | 1.25 (0.69-2.28)    |
| No education, preschool   | Ref                 | Ref                | Ref                 | Ref                 |
| <b>Occupational</b>       |                     |                    |                     |                     |
| Non-manual                | 3.27 (1.94-5.52) ** | 4.22 (2.26-7.9) ** | 3.04 (2.19-4.22) ** | 3.69 (1.63-8.36) ** |
| Manual                    | Ref                 | Ref                | Ref                 | Ref                 |
| <b>Place of residence</b> |                     |                    |                     |                     |
| Urban                     | 1.33 (0.9-1.95)     | 1.17 (0.8-1.72)    | 1.04 (0.85-1.27)    | 1.72 (0.99-3.01)    |
| Rural                     | Ref                 | Ref                | Ref                 | Ref                 |

1  
2  
3  
4  
5  
6  
7  
8  
9  
10  
11  
12  
13  
14  
15  
16  
17  
18  
19  
20  
21  
22  
23  
24  
25  
26  
27  
28  
29  
30  
31  
32  
33  
34  
35  
36  
37  
38  
39  
40  
41  
42  
43  
44  
45  
46  
47

For peer review only

# BMJ Open

## Association between high socioeconomic status with greater prevalence of non-communicable diseases risk factors and comorbidities in Bangladesh: Findings from a nationwide cross-sectional survey

|                                 |                                                                                                                                                                                                                                                                                                                                                                                                                                                                                  |
|---------------------------------|----------------------------------------------------------------------------------------------------------------------------------------------------------------------------------------------------------------------------------------------------------------------------------------------------------------------------------------------------------------------------------------------------------------------------------------------------------------------------------|
| Journal:                        | <i>BMJ Open</i>                                                                                                                                                                                                                                                                                                                                                                                                                                                                  |
| Manuscript ID                   | bmjopen-2018-025538.R2                                                                                                                                                                                                                                                                                                                                                                                                                                                           |
| Article Type:                   | Research                                                                                                                                                                                                                                                                                                                                                                                                                                                                         |
| Date Submitted by the Author:   | 22-Jan-2019                                                                                                                                                                                                                                                                                                                                                                                                                                                                      |
| Complete List of Authors:       | Biswas, Tuhin; International Centre for Diarrhoeal Disease Research Bangladesh, Townsend, Nick<br>Islam, Md.saimul; University of Rajshahi, Department of Statistics;<br>Islam, Md. Rajibul ; Health Intervention and Technology Assessment Program (HITAP), Ministry of Public Health, Nonthaburi, Thailand<br>Das Gupta, Rajat; BRAC University James P Grant School of Public Health,<br>Das, Sumon<br>Mamun, Abdullah; University of Queensland, School of Population Health |
| <b>Primary Subject Heading</b>: | Epidemiology                                                                                                                                                                                                                                                                                                                                                                                                                                                                     |
| Secondary Subject Heading:      | Public health, Diabetes and endocrinology, Cardiovascular medicine                                                                                                                                                                                                                                                                                                                                                                                                               |
| Keywords:                       | Overweight, DIABETES & ENDOCRINOLOGY, Hypertension < CARDIOLOGY                                                                                                                                                                                                                                                                                                                                                                                                                  |
|                                 |                                                                                                                                                                                                                                                                                                                                                                                                                                                                                  |

SCHOLARONE™  
Manuscripts



1  
2  
3 1 **Title: Association between high socioeconomic status with greater prevalence**  
4  
5  
6 2 **of non-communicable diseases risk factors and comorbidities in Bangladesh:**  
7  
8  
9 3 **Findings from a nationwide cross-sectional survey**  
10  
11  
12 4  
13  
14  
15  
16 5  
17  
18

19 6 **Authors:**

20  
21  
22 7 Tuhin Biswas<sup>1,2\*</sup>, Nick Townsend<sup>3</sup>, Md. Saimul Islam<sup>4</sup>, Md. Rajibul Islam<sup>5</sup>, Rajat Das Gupta<sup>6,7</sup>,  
23  
24 8 Sumon Kumar Das<sup>2</sup>, Abdullah Al Mamun<sup>2</sup>  
25  
26  
27  
28 9

30  
31 10 **Affiliations:**

32  
33  
34 11 <sup>1</sup> Universal Health Coverage, Health Systems and Population Studies Division, icddr,b,  
35  
36 12 Mohakhali, Dhaka, Bangladesh

37  
38  
39 13 <sup>2</sup>Institute for Social Science Research, The University of Queensland, Long Pocket Precinct,  
40  
41 14 Indooroopilly, Queensland, Australia.

42  
43  
44 15 <sup>3</sup> Department for Health, University of Bath, United Kingdom

45  
46  
47 16 <sup>4</sup> University Rajshahi, Rajshahi, Bangladesh.

48  
49  
50  
51 17 <sup>5</sup> Health Intervention and Technology Assessment Program (HITAP), Ministry of Public Health,  
52  
53 18 Nonthaburi, Thailand.  
54  
55  
56  
57

1  
2  
3 19 <sup>6</sup> Centre for Non-Communicable Diseases and Nutrition, BRAC James P Grant School of Public  
4  
5 20 Health, BRAC University, Dhaka, Bangladesh  
6  
7

8  
9 21 <sup>7</sup> Centre for Science of Implementation and Scale-Up, BRAC James P Grant School of Public  
10  
11 22 Health, BRAC University, Dhaka, Bangladesh  
12  
13

14 23 **\*Corresponding author:**

15  
16  
17 24 Biswas Tuhin

18  
19  
20  
21 25 Health Systems and Population Studies Division, icddr,b, Mohakhali, Dhaka, Bangladesh;

22  
23 26 Institute for Social Science Research, The University of Queensland, Long Pocket Precinct,

24  
25 27 Indooroopilly, Queensland, Australia.  
26  
27

28 28 **Email:** tuhin\_sps04@yahoo.com  
29  
30  
31  
32  
33  
34  
35  
36  
37  
38  
39  
40  
41  
42  
43  
44  
45  
46  
47  
48  
49  
50  
51  
52  
53  
54  
55  
56  
57

## 30 ABSTRACT

31 **Objectives:** This study aimed to examine the prevalence and distribution in the comorbidity of  
32 non-communicable diseases (NCD) among the adult population in Bangladesh by measures of  
33 socioeconomic status (SES).

34 **Design:** This was a cross-sectional study.

35 **Setting:** This study used Bangladesh Demographic and Health Survey (2011) data.

36 **Participants:** Total 8,763 individuals aged  $\geq 35$  years were included.

37 **Primary and secondary outcome measures:** The primary outcome measures were diabetes  
38 (DM), hypertension (HTN) and overweight/obesity. The study further assesses factors (in  
39 particular socioeconomic status) associated with these comorbidities (diabetes (DM),  
40 hypertension (HTN) and overweight/obesity).

41 **Results:** Of 8,763 adults, 12% had DM, 27% HTN and 22% were overweight/obese  
42 ( $\text{BMI} \geq 23 \text{ kg/m}^2$ ). Just over 1% of the sample had all three conditions, 3% had both DM and  
43 HTN, 3% DM and overweight and 7% HTN and overweight. Diabetes, hypertension and  
44 overweight were more prevalent those who had higher education, were non-manual workers,  
45 were in the richer to richest socioeconomic status and lived in urban settings. Individuals in  
46 higher SES groups were also more likely to suffer from comorbidities. In the multivariable  
47 analysis, it was found that individual belonging to the richest wealth quintile had the highest  
48 odds of having hypertension (Adjusted Odds Ratio (AOR): 1.49, 95% Confidence Interval (CI):  
49 1.29-1.72), diabetes (AOR: 1.63, 95% CI: 1.25-2.14) and obesity (AOR: 4.3, 95% CI: 3.32-  
50 5.57).

1  
2  
3 51  
4  
5  
6  
7 52 **Conclusions:** In contrast to more affluent countries, individuals with NCD risk factors and  
8  
9 53 comorbidities are more common in higher socio-economic status individuals. Public health  
10  
11 54 approaches must consider this social patterning in tackling NCDs in the country.  
12  
13  
14 55  
15  
16  
17  
18 56 **Key words:** Overweight, Diabetes, Hypertension, Non-communicable Disease, socioeconomic  
19  
20 57 status, Bangladesh  
21  
22  
23  
24  
25  
26  
27  
28  
29  
30  
31  
32  
33  
34  
35  
36  
37  
38  
39  
40  
41  
42  
43  
44  
45  
46  
47  
48  
49  
50  
51  
52  
53  
54  
55  
56  
57

## 58 STRENGTHS AND LIMITATIONS OF THE STUDY

- 59 • The biggest strength of the study is that it utilized a large dataset nationally representative of  
60 the Bangladesh population, collected using measures that have been designed and validated  
61 through previous data collections in the country.
- 62 • Data collection included clinical measures of blood pressure, blood glucose concentration,  
63 body weight, and height collected by a health technician.
- 64 • The main weakness of the study is that it is cross-sectional in nature, meaning that only  
65 associations can be inferred and causality cannot be determined.

66

## 67 INTRODUCTION

68 According to the Global Burden of Disease report, non-communicable diseases (NCDs)  
69 are the leading cause of death worldwide<sup>1-3</sup> and that 80% of this NCD mortality actually occurs  
70 in low- and middle-income countries (LMICs)<sup>4-6</sup>. Similarly, the 2014 NCDs global status report  
71 showed that of 58 million deaths that occurred globally in 2012, 38 million - almost two thirds -  
72 were due to NCDs, with these deaths most due to the four most common NCDs: cardiovascular  
73 diseases, cancers, diabetes and chronic lung diseases.<sup>7</sup> In addition, the report showed that more  
74 than 40% of these deaths (16 million) occurred were in individuals under the age of 70 years,  
75 often referred to as premature deaths<sup>7</sup>. Deaths at younger ages may be a greater demonstration of  
76 its burden, as many consider them preventable. It is alarming, therefore, that the majority of  
77 premature deaths (82%) occur in LMICs, with this problem likely to increase if appropriate  
78 preventative actions are not taken at a population level.

79 Like many LMICs, Bangladesh is undergoing rapid urbanization with changing patterns  
80 of diseases among the population<sup>8, 9</sup>, with some suggesting that the country is at an advanced  
81 phase of the third stage of the epidemiologic transition, with deaths from NCDs expected to  
82 increase rapidly in the coming years.<sup>10</sup> This increasing mortality from NCDs in the country is  
83 supported by high prevalence of the medical risk factors associated with NCDs. A recent WHO  
84 STEPS survey in Bangladesh reported that 21% of the population had hypertension, 26% were  
85 overweight and 5% had documented diabetes.<sup>11</sup>

86 These high prevalence figures, raise concerns of comorbidity, in which individuals suffer  
87 from more than one of the risk factors at a time, with this thought to be highly predictive of end  
88 point diseases, disability and death.<sup>12</sup> There is evidence of comorbidity risk for factors including

1  
2  
3 89 obesity, diabetes and hypertension, predominantly coming from industrialized countries<sup>13-15</sup> and  
4  
5 90 developing nations<sup>16-18</sup>; however evidence on NCD comorbidity scant in Bangladesh. This is  
6  
7  
8 91 important as the patterning of NCDs is not uniform across countries of different income  
9  
10 92 classification, with a higher prevalence of some NCD risk factors, such as diabetes, found in  
11  
12 93 higher socio-economic groups in many studies in LMICs, contradicting those from higher  
13  
14  
15 94 income countries.<sup>19</sup>

16  
17  
18 95 With the development of a double burden from both over- and under-nutrition in these  
19  
20 96 LMICs, understanding comorbidity and their correlates is important if we are to develop NCD  
21  
22 97 preventative policies contextualized for these countries. Despite the availability of nationwide  
23  
24  
25 98 survey data in Bangladesh, the prevalence, and in particular the comorbidity of NCD medical  
26  
27 99 risk factors remains unmapped. This understanding of the burden and patterning of NCDs and  
28  
29 100 their risk factors is important if Bangladesh is able to meet the Sustainable Development Goals  
30  
31 101 (SDGs) target of reducing premature death from NCDs by one third by 2030.<sup>20</sup>

32  
33  
34  
35 102 This study used 2011 Bangladesh Demography and Health Survey (BDHS) data to  
36  
37 103 estimate the prevalence and pattern of NCD risk factors and comorbidity among the general  
38  
39 104 population aged 35 years and older, as well as determining their socio-demographic patterning  
40  
41  
42 105 and possible predictors of comorbidity .

## 43 44 45 106 46 47 107 **METHODS**

### 48 49 50 108 **Study design**

51  
52  
53 109 This study used data from the 2011 Bangladesh Demography and Health Survey  
54  
55  
56 110 (BDHS). The 2011 BDHS is a cross-sectional nationally representative survey that was

1  
2  
3 111 conducted between July and December 2011 through the collaboration of the National Institute  
4  
5 112 of Population Research and Training (NIPORT), ICF International (USA), and Mitra and  
6  
7 113 Associates. Participants in the BDHS were selected using probability sampling based on a two-  
8  
9 114 stage cluster sample of households, and stratified by rural and urban areas in the seven  
10  
11 115 administrative regions of Bangladesh. The detailed protocol and methods have been published  
12  
13 116 previously.<sup>21</sup> In brief, 17,500 households were surveyed, of which one in three households were  
14  
15 117 randomly selected for biomarker measurement (blood glucose, blood pressure). All men and  
16  
17 118 women age 35 years and above were eligible for the biomarker measures, with these collected  
18  
19 119 from a final sample of 8,835 individuals (male: 4524, female: 4311).<sup>22</sup> We included 8763 cases  
20  
21  
22  
23  
24 120 in our analytical sample, after excluding cases with missing values.  
25  
26  
27  
28

121

## 122 **Measurements of outcomes**

123 A data collection team, including a health technician, measured blood pressure, blood  
124 glucose concentration, body weight, and height using standard methods.<sup>21</sup> Diabetes (DM) was  
125 defined as a fasting blood glucose level greater than or equal to 7.0 mmol/L or self-reported  
126 diabetes medication use.<sup>23</sup> Body mass index (BMI) was calculated as weight (kg)/height (m<sup>2</sup>).  
127 We used Asian specific BMI cut-offs to define underweight as <18.5 kg/m<sup>2</sup> and overweight and  
128 obese (higher BMI) as  $\geq 23$  kg/m<sup>2</sup>.<sup>24</sup> Hypertension was defined as systolic blood pressure (SBP)  
129  $\geq 140$  mmHg and diastolic blood pressure (DBP)  $\geq 90$  mmHg or self-reported anti-hypertensive  
130 medication use during the survey.<sup>25</sup> We then categorized comorbidity into four groups such as  
131 respondents having DM and HTN (group A), DM and overweight/obesity (group B), HTN and  
132 overweight/obesity (group C) and group D in which individuals had all three conditions (DM,  
133 HTN and overweight/obesity ).



134

### 135 **Socio-demographic factors**

136 We categorized age as older (defined as 56 years and above) and younger (35 to 55  
137 years).<sup>26</sup> Education status was characterized into five levels: 1) no education, 2) preschool, 3)  
138 primary, 4) secondary and 5) college or higher. We categorized occupation as manual or non-  
139 manual worker and used principle component analysis to determine a wealth index was as  
140 described in the BDHS 2011 report.<sup>21</sup> Place of residence (urban and rural) and sex (male and  
141 female) were also included as important factors.

142

### 143 **Statistical analysis**

144 HTN, DM, overweight/obesity and all possible combinations of the comorbidity  
145 conditions were the main outcomes of interest. For analysis purposes, all outcomes were  
146 dichotomized into persons with or without the risk factor. Sex, age, education, occupation,  
147 wealth index and place of residence were included in analysis as independent variables. We  
148 calculated the weighted prevalence of DM, HTN, overweight/obesity through percentage in the  
149 sample and used modified Poisson regression (PR) models with robust error variance to  
150 calculate prevalence ratios (PR) and 95% confidence interval for DM, HTN and overweight.  
151 These analyses were adjusted for cluster and sample weight and were done using IBMSPSS 21  
152 (IBM Corp. Released 2012. IBMSPSS Statistics for Windows, Version 21.0. Armonk, NY: IBM  
153 Corp.). We also calculated the power to assess whether the existing sample size is enough for  
154 performing the multivariable regression models. The variables sex, age, education, occupation  
155 are control variables and not of primary research interest. The variable wealth index is our  
156 primary interest to assess the association with the joint estimates of NCDs. We have converted

1  
2  
3 157 the log ( PR) to calculate the effect size by the formula  $d = \log(\text{prevalence ratio}) \times (\sqrt{3/\pi})$ . The  
4  
5 158 primary research hypothesis was to test the wealth index from poorer to richest groups with the  
6  
7 159 joint estimate of NCDs in the regression equation. We have considered the power .90, level of  
8  
9 160 significance 0.05 , calculated effect size from prevalence ratio and then we get the estimated  
10  
11 161 sample size for each model of each outcomes which covers the existing sample size of our  
12  
13 162 analysis. We have performed the power analysis using G\*Power software. The authors followed  
14  
15 163 the guidelines outlined in the Strengthening the Reporting of Observational Studies in  
16  
17 164 Epidemiology (*STROBE*) statement in writing the manuscript (Supplementary File 1).  
18  
19  
20  
21  
22  
23  
24

## 166 Ethical consideration and patient involvement

25  
26  
27 167 Patients were not involved in the study. BDHS 2011 received ethical approval from ICF  
28  
29 168 Macro Institutional Review Board, Maryland, USA and National Research Ethics Committee of  
30  
31 169 Bangladesh Medical Research Council (BMRC), Dhaka, Bangladesh. Written informed consent  
32  
33 170 was taken from the participants before the survey was completed.  
34  
35  
36  
37

## 171 FINDINGS

38  
39 172 The study population (n=8763) comprised 51% males, around 56% were 56 years of age  
40  
41 173 or older, 62% reported no education, 25% were in manual employment, and 76% lived in rural  
42  
43 174 locations (Table 1).  
44  
45  
46  
47

175 **Table-1: General characteristics of the study population**

| Variables | n | % |
|-----------|---|---|
| Sex       |   |   |

|                           |      |       |
|---------------------------|------|-------|
| Male                      | 4480 | 51.13 |
| Female                    | 4283 | 48.87 |
| <b>Age</b>                |      |       |
| Younger                   | 3603 | 55.77 |
| Older                     | 2858 | 44.23 |
| <b>Education</b>          |      |       |
| College or higher         | 592  | 6.75  |
| Secondary                 | 1129 | 12.88 |
| Primary                   | 1634 | 18.64 |
| No education, preschool   | 5409 | 61.72 |
| <b>Occupation</b>         |      |       |
| Manual                    | 2142 | 24.89 |
| Non-manual                | 6464 | 75.11 |
| <b>Wealth index</b>       |      |       |
| Poorest                   | 1696 | 19.36 |
| Poorer                    | 1671 | 19.06 |
| Middle                    | 1692 | 19.31 |
| Richer                    | 1784 | 20.35 |
| Richest                   | 1921 | 21.92 |
| <b>Place of residence</b> |      |       |
| Rural                     | 6623 | 75.58 |
| Urban                     | 2140 | 24.42 |

1  
2  
3 176  
4  
5  
6 177 Among the sample 12% had diabetes, 27% had HTN and 22% were classified as  
7  
8 178 overweight/obesity ( $BMI \geq 23 \text{ kg/m}^2$ ). The probability of having diabetes and hypertension  
9  
10 179 increased by increasing age group, whilst the probability of being overweight/obesity was higher  
11  
12 180 in the younger age group (Figure 1). Prevalence of all these conditions were higher amongst  
13  
14 181 males than females. The prevalence of group A (DM and HTN,  $n=270$ ) and group B (DM and  
15  
16 182 overweight/obesity,  $n=191$ ) comorbidities was 3%, whilst 7% of the sample had group C  
17  
18 183 comorbidity (HTN and overweight/obesity,  $n=513$ ). One percent (1%) of the sample all three  
19  
20 184 conditions (DM, HTN and overweight/obesity =104). Prevalence of all groups of comorbidity  
21  
22 185 was higher in males than females, except for group B (DM and overweight/obesity) (Figure 2).  
23  
24 186 The prevalence of individual conditions and all comorbidities was higher amongst older  
25  
26 187 individuals, those with a 'College or higher' education, 'non-manual' workers, people in the  
27  
28 188 richest quintile for wealth index and those living in urban environments (Table 2).  
29  
30  
31  
32  
33  
34  
35 189  
36  
37  
38  
39  
40  
41  
42  
43  
44  
45  
46  
47  
48  
49  
50  
51  
52  
53  
54  
55  
56  
57

| Variables                     | Diabetes<br>(%, 95% CI) | Hypertension<br>(%, 95% CI) | Overweight<br>(%, 95% CI) | Group-A<br>(%, 95% CI)<br>(Diabetes and<br>hypertension ) | Group-B<br>(%, 95% CI)<br>(Diabetes and<br>overweight/obesity<br>) | Group-C<br>(%, 95% CI)<br>(Hypertension and<br>overweight/obesity ) | Group-D<br>(%, 95% CI)<br>(Diabetes,<br>hypertension and<br>overweight/obesity |
|-------------------------------|-------------------------|-----------------------------|---------------------------|-----------------------------------------------------------|--------------------------------------------------------------------|---------------------------------------------------------------------|--------------------------------------------------------------------------------|
| <b>Age</b>                    |                         |                             |                           |                                                           |                                                                    |                                                                     |                                                                                |
| Younger                       | 10.2 (9-11.5)           | 19.2 (17.4-21.1)            | 24.6 (22.7-26.5)          | 2.2 (1.7-2.9)                                             | 3.5 (2.8-4.4)                                                      | 8.5 (7.4-9.8)                                                       | 1.4 (1-2)                                                                      |
| Older                         | 14.7 (12.9-16.7)        | 38.7 (36.3-41.2)            | 18 (16.2-20)              | 5 (4.1-6.1)                                               | 3.3 (2.5-4.3)                                                      | 10.1 (8.8-11.5)                                                     | 2.3 (1.6-3.2)                                                                  |
| <b>Education</b>              |                         |                             |                           |                                                           |                                                                    |                                                                     |                                                                                |
| Higher                        | 22 (18.7-25.8)          | 33.1 (29.4-37)              | 53.9 (49-58.8)            | 7.7 (5.6-10.6)                                            | 8.6 (6.4-11.4)                                                     | 17.5 (14.5-21)                                                      | 4.3 (2.8-6.5)                                                                  |
| Secondary                     | 13.3 (11.4-15.4)        | 27.5 (24.9-30.3)            | 29.7 (26.4-33.2)          | 4.8 (3.7-6.1)                                             | 3.6 (2.6-4.8)                                                      | 7.8 (6.3-9.8)                                                       | 1.8 (1.1-2.9)                                                                  |
| Primary                       | 11.6 (10.2-13.3)        | 23.6 (21.4-25.9)            | 21 (18.6-23.6)            | 3.2 (2.5-4.3)                                             | 2.5 (1.9-3.4)                                                      | 7.1 (5.8-8.5)                                                       | 1.2 (0.8-1.8)                                                                  |
| No<br>education,<br>preschool | 9.5 (8.3-10.8)          | 28 (26.1-30)                | 13.3 (11.9-15)            | 2.5 (1.9-3.1)                                             | 1.2 (0.9-1.8)                                                      | 5.2 (4.4-6.1)                                                       | 0.8 (0.5-1.3)                                                                  |
| <b>Occupation</b>             |                         |                             |                           |                                                           |                                                                    |                                                                     |                                                                                |
| Manual                        | 6.8 (5.6-8.2)           | 14.4 (12.7-16.3)            | 10.5 (9.2-12.1)           | 1 (0.6-1.6)                                               | 0.8 (0.4-1.3)                                                      | 2.7 (2-3.5)                                                         | 0.4 (0.2-0.9)                                                                  |
| Non-manual                    | 13.4 (12.3-14.6)        | 31.5 (29.8-33.1)            | 27.7 (25.8-29.6)          | 4.3 (3.7-5)                                               | 3.2 (2.6-3.9)                                                      | 8.8 (7.9-9.8)                                                       | 1.7 (1.3-2.2)                                                                  |
| <b>Wealth<br/>index</b>       |                         |                             |                           |                                                           |                                                                    |                                                                     |                                                                                |
| Poorest                       | 8.4 (6.9-10.2)          | 20.6 (18.3-23.1)            | 6.6 (5.2-8.5)             | 1.7 (1.1-2.6)                                             | 0.6 (0.3-1.4)                                                      | 2.2 (1.5-3.3)                                                       | 0.4 (0.1-1.1)                                                                  |

190 **Table-2: Weighted prevalence of individual conditions and comorbidities by characteristics**

191

|                           |                  |                  |                  |               |               |                  |               |
|---------------------------|------------------|------------------|------------------|---------------|---------------|------------------|---------------|
| Poorer                    | 8.1 (6.4-10.2)   | 22.6 (20-25.4)   | 10.4 (8.6-12.7)  | 1.7 (1-2.8)   | 0.5 (0.2-1.2) | 2.9 (2.1-4)      | 0.3 (0.1-0.9) |
| Middle                    | 8.2 (6.7-9.9)    | 24.2 (21.9-26.6) | 14.6 (12.3-17.2) | 2 (1.3-2.9)   | 1 (0.5-1.8)   | 3.4 (2.5-4.7)    | 0.4 (0.2-1.1) |
| Richer                    | 11.8 (9.9-14)    | 28.8 (26.4-31.3) | 27.8 (24.7-31.1) | 3.5 (2.6-4.7) | 2.5 (1.8-3.5) | 9.3 (7.9-11)     | 1.2 (0.7-1.9) |
| Richest                   | 20.8 (18.6-23.3) | 38.6 (36.3-41.1) | 47.9 (44.8-51)   | 8.3 (6.8-10)  | 8 (6.5-9.8)   | 17.6 (15.6-19.7) | 4.3 (3.2-5.7) |
| <b>Place of residence</b> |                  |                  |                  |               |               |                  |               |
| Urban                     | 16.5 (14.6-18.5) | 33.3 (31.1-35.5) | 37.4 (34.3-40.7) | 6 (4.9-7.3)   | 5.5 (4.4-6.8) | 12.9 (11.3-14.6) | 3.1 (2.3-4.2) |
| Rural                     | 10.3 (9.3-11.3)  | 25.3 (23.5-27.1) | 17.1 (15.6-18.6) | 2.7 (2.2-3.3) | 1.7 (1.2-2.3) | 5.4 (4.7-6.3)    | 0.8 (0.5-1.3) |

192

1  
2  
3 193 The prevalence ratio (PR), from modified Poisson regression models, of HTN, DM and  
4  
5 194 overweight/obesity was significantly higher among those who had completed higher education,  
6  
7  
8 195 those living in urban areas, non-manual workers and those in the richer to richest socioeconomic  
9  
10 196 status. Although there was no sex disparities for diabetes, HTN and overweight/obesity was  
11  
12 197 higher amongst males. Overweight/obesity was the only condition that was significantly higher  
13  
14  
15 198 among younger participants (Table 3).  
16  
17  
18  
19  
20  
21  
22  
23  
24  
25  
26  
27  
28  
29  
30  
31  
32  
33  
34  
35  
36  
37  
38  
39  
40  
41  
42  
43  
44  
45  
46  
47  
48  
49  
50  
51  
52  
53  
54  
55  
56  
57

199 **Table-3: Modified Poisson regression models showing prevalence ratios (PR) and 95% confidence intervals for diabetes,**  
 200 **hypertension and overweight by demographic characteristics among Bangladeshi adults**

| Variables               | Diabetes            | Hypertension        | Overweight/obesity  |
|-------------------------|---------------------|---------------------|---------------------|
|                         | PR (95% CI)         | PR (95% CI)         | PR (95% CI)         |
| <b>Sex</b>              |                     |                     |                     |
| Female                  | 0.89 (0.74-1.08)    | 0.59 (0.53-0.65) ** | 0.7 (0.62-0.79) **  |
| Male                    | Ref                 | Ref                 | Ref                 |
| <b>Age #</b>            |                     |                     |                     |
| Older                   | 1.48 (1.26-1.73) ** | 1.72 (1.56-1.88) ** | 0.75 (0.67-0.83) ** |
| Younger                 | Ref                 | Ref                 | Ref                 |
| <b>Education</b>        |                     |                     |                     |
| College or higher       | 1.71 (1.32-2.23) ** | 1.36 (1.15-1.61) ** | 2.11 (1.79-2.5) **  |
| Secondary               | 1.16 (0.92-1.48)    | 1.13 (0.99-1.28)    | 1.56 (1.34-1.83) ** |
| Primary                 | 1.21 (0.99-1.48)    | 0.97 (0.87-1.08)    | 1.29 (1.12-1.5) **  |
| No education, preschool | Ref                 | Ref                 | Ref                 |



|                           |                     |                     |                     |
|---------------------------|---------------------|---------------------|---------------------|
| <b>Occupation</b>         |                     |                     |                     |
| Non-manual###             | 1.54 (1.24-1.91) ** | 1.46 (1.28-1.68) ** | 1.62 (1.39-1.90) ** |
| Manual                    | Ref                 | Ref                 | Ref                 |
| <b>Wealth index</b>       |                     |                     |                     |
| Richest                   | 1.63 (1.25-2.14) ** | 1.49 (1.29-1.72) ** | 4.3 (3.32-5.57) **  |
| Richer                    | 1.04 (0.79-1.35)    | 1.24 (1.08-1.42) ** | 3.07 (2.39-3.95) ** |
| Middle                    | 0.77 (0.58-1.03)    | 1.05 (0.91-1.21)    | 1.8 (1.38-2.36) **  |
| Poorer                    | 0.94 (0.71-1.24)    | 1.01 (0.87-1.16)    | 1.45 (1.09-1.92) ** |
| Poorest                   | Ref                 | Ref                 | Ref                 |
| <b>Place of residence</b> |                     |                     |                     |
| Urban                     | 1.1 (0.92-1.32)     | 1.05 (0.95-1.15)    | 1.09 (0.98-1.21)    |
| Rural                     | Ref                 | Ref                 | Ref                 |

202 # Younger-(35–55 years and older (56 years or older) [23].

203 ##\*Non-manual category included sedentary workers, professionals (e.g., doctors, teachers, etc.), housewives, retired persons, those  
204 unable to work and unemployed [24].

205 \*\*Statistical significance at p<0.05

1  
2  
3 206 In univariate Poisson regression models, those in the richest quintile of wealth index had the  
4  
5 207 highest PR for all comorbidity groups. These differences remained significant in all models in a  
6  
7  
8 208 stepwise process (**Supplementary File 2**). In final models, once controlling for sex, age,  
9  
10 209 education, occupation and urbanization, those in the richest quintile were 2.3 times as likely to  
11  
12 210 have DM and HTN, 4.8 times as likely to have DM and overweight/obesity, 4.9 times as likely to  
13  
14 211 have HTN and overweight/obesity and 4.0 times as likely to have all three comorbidities, than  
15  
16 212 those in the poorest quintile. In these final models, non-manual workers were also significantly  
17  
18 213 more likely than manual workers to have all comorbidity groups. Sex differences were lost on  
19  
20 214 controlling for other factor for all comorbidities groups, except Group C (HTN and  
21  
22 215 overweight/obesity), for which females were 1.4 times as likely to experience both. Older  
23  
24 216 participants were significantly more likely to have group A comorbidity (DM and HTN) DM  
25  
26  
27  
28  
29 217 and Group D (all comorbidities) (Table 4).  
30  
31  
32  
33  
34  
35  
36  
37  
38  
39  
40  
41  
42  
43  
44  
45  
46  
47  
48  
49  
50  
51  
52  
53  
54  
55  
56  
57

218 **Table-4: Modified stepwise Poisson regression models showing prevalence ratios (PR) and 95% confidence intervals for**  
 219 **comorbidities by demographic characteristics among Bangladeshi adults.**

220

| Model                                                                                  | Group-A<br>(Diabetes and<br>hypertension ) | Group-B<br>(Diabetes and<br>overweight/obesity) | Group-C<br>(Hypertension and<br>overweight/obesity) | Group-D<br>(Diabetes, hypertension<br>and overweight/obesity) |
|----------------------------------------------------------------------------------------|--------------------------------------------|-------------------------------------------------|-----------------------------------------------------|---------------------------------------------------------------|
| <b>Model-1 (Wealth index )</b>                                                         |                                            |                                                 |                                                     |                                                               |
| <i>Wealth index</i>                                                                    |                                            |                                                 |                                                     |                                                               |
| Richest                                                                                | 3.94 (2.42-6.41)**                         | 9.69 (4.84-19.4) **                             | 6.83 (4.66-10) **                                   | 8.67 (3.65-20.56) **                                          |
| Richer                                                                                 | 1.52 (0.88-2.61)                           | 3.39 (1.61-7.16) **                             | 3.78 (2.53-5.64) **                                 | 2.44 (0.95-6.31)                                              |
| Middle                                                                                 | 0.9 (0.47-1.71)                            | 1.63 (0.69-3.81)                                | 1.3 (0.81-2.07)                                     | 1.17 (0.37-3.7)                                               |
| Poorer                                                                                 | 0.9 (0.47-1.73)                            | 0.81 (0.31-2.16)                                | 1.13 (0.7-1.84)                                     | 0.79 (0.24-2.64)                                              |
| Poorest                                                                                | Ref                                        | Ref                                             | Ref                                                 | Ref                                                           |
| <b>Model-6 ( Wealth index + sex+ age + education+ occupation+ place of residence )</b> |                                            |                                                 |                                                     |                                                               |
| <i>Wealth index</i>                                                                    |                                            |                                                 |                                                     |                                                               |
| Richest                                                                                | 2.32 (1.32-4.1) **                         | 4.84 (2.26-10.4) **                             | 4.85 (3.25-7.24) **                                 | 3.99 (1.58-10.11) **                                          |

|                         |                     |                  |                     |                     |
|-------------------------|---------------------|------------------|---------------------|---------------------|
| Richer                  | 1.12 (0.66-1.91)    | 2.22 (1.02-4.8)  | 3.03 (2.04-4.49)    | 1.59 (0.65-3.92)    |
| Middle                  | 0.74 (0.39-1.38)    | 1.23 (0.54-2.82) | 1.1 (0.69-1.75)     | 0.9 (0.31-2.64)     |
| Poorer                  | 0.78 (0.41-1.48)    | 0.71 (0.27-1.88) | 1.06 (0.65-1.7)     | 0.7 (0.22-2.24)     |
| Poorest                 | Ref                 | Ref              | Ref                 | Ref                 |
| <b>Sex</b>              |                     |                  |                     |                     |
| Female                  | 0.67 (0.35-1.31)    | 0.91 (0.47-1.78) | 1.44 (1.06-1.96) ** | 1.05 (0.46-2.36)    |
| Male                    | Ref                 | Ref              | Ref                 | Ref                 |
| <b>Age</b>              |                     |                  |                     |                     |
| Older                   | 2.17 (1.58-2.99) ** | 0.87 (0.62-1.21) | 1.11 (0.91-1.35)    | 1.61 (1.05-2.49) ** |
| Younger                 | Ref                 | Ref              | Ref                 | Ref                 |
| <b>Education</b>        |                     |                  |                     |                     |
| College or higher       | 1.38 (0.85-2.25)    | 1.53 (0.93-2.5)  | 1.09 (0.82-1.45)    | 1.4 (0.74-2.63)     |
| Secondary               | 1.06 (0.68-1.65)    | 1.33 (0.8-2.19)  | 0.91 (0.68-1.2)     | 1.24 (0.65-2.38)    |
| Primary                 | 1.03 (0.69-1.53)    | 1.42 (0.89-2.26) | 1.18 (0.93-1.5)     | 1.25 (0.69-2.28)    |
| No education, preschool | Ref                 | Ref              | Ref                 | Ref                 |
| <b>Occupational</b>     |                     |                  |                     |                     |

|                           |                     |                    |                     |                     |
|---------------------------|---------------------|--------------------|---------------------|---------------------|
| Non-manual                | 3.27 (1.94-5.52) ** | 4.22 (2.26-7.9) ** | 3.04 (2.19-4.22) ** | 3.69 (1.63-8.36) ** |
| Manual                    | Ref                 | Ref                | Ref                 | Ref                 |
| <i>Place of residence</i> |                     |                    |                     |                     |
| Urban                     | 1.33 (0.9-1.95)     | 1.17 (0.8-1.72)    | 1.04 (0.85-1.27)    | 1.72 (0.99-3.01)    |
| Rural                     | Ref                 | Ref                | Ref                 | Ref                 |

221

222 \*\* Statistical significance at p<0.05

For peer review only

## 223 DISCUSSION

224  
225 This is the first study in Bangladesh that investigated individual and comorbid  
226 conditions using a nationally representative sample. We found that within the Bangladesh adult  
227 population, aged more than 35 years, the prevalence of diabetes was 12%, hypertension 27%  
228 and overweight/obesity 22%. Diabetes, hypertension and overweight/obesity were comparatively  
229 higher in males than females. More than 14% of the sample also had more than one condition,  
230 with 1.3% exhibiting all three. We also found that individual prevalence and comorbidity were  
231 higher in those of a higher socioeconomic status. Once controlling for several confounders, those  
232 in the richest quintile of wealth index were significantly more likely than those in the poorest  
233 quintile to exhibit comorbidities.

234 These findings demonstrate an alarming burden of NCDs within Bangladesh, with the  
235 rapid growth of overweight in the country becoming a particular public health concern.<sup>27-29</sup> As  
236 with many other developing countries, Bangladesh is experiencing a nutritional transition and  
237 increases in gross domestic product (GDP), which have been associated with multiple shifts in  
238 food intake and reduced physical activity.<sup>30</sup>

239 Although, to the authors knowledge, this is the first study on the prevalence of NCD  
240 risk factor comorbidity in Bangladesh using a nationally representative sample, a previous study  
241 had found an association between anthropometric indices such as body mass index (BMI), waist  
242 circumference (WC), waist hip ratio (WHR) and cardio metabolic risk indicators (FBG, SBP and  
243 DBP).<sup>31</sup> A further study in four geographical regions, including Bangladesh, reported that every  
244 standard deviation higher of BMI was associated with 1.65 and 1.60 times higher probability of

1  
2  
3 245 diabetes and 1.42 and 1.28 times higher probability of hypertension, for men and women,  
4  
5 246 respectively.<sup>32</sup> Other studies have also found that HTN is a common comorbid condition in DM,  
6  
7 247 and vice versa,<sup>33</sup> whilst there is considerable evidence for an increased prevalence of HTN in  
8  
9 248 diabetic persons from other populations.<sup>34,35</sup>  
10  
11  
12

13 249 In the current study, overweight and diabetes risk was greater among young  
14  
15 250 people which is consistent with a similar study conducted in Indonesia.<sup>36</sup> Diabetes, hypertension  
16  
17 251 and overweight/obesity were more prevalent in non-manual labor compared to manual labor,  
18  
19 252 which was similar to findings from a study in Barbados.<sup>37</sup> However, the present study found  
20  
21 253 males were more likely to suffer comorbidities than females, contradicting findings from  
22  
23 254 previous studies.<sup>38,39</sup> We also found that the prevalence of individual conditions (diabetes,  
24  
25 255 hypertension and overweight/obesity) along with the comorbidity of them, was higher in urban  
26  
27 256 areas compared to rural, which is consistent with a number of studies conducted in developing  
28  
29 257 countries, including Bangladesh.<sup>33,40-44</sup>  
30  
31  
32  
33  
34

35 258 Within our study we found a higher prevalence of individual conditions and  
36  
37 259 comorbidities in higher socioeconomic groups. These findings conflict with trends reported by  
38  
39 260 previous studies conducted in higher-income countries.<sup>45, 46</sup> However, another multi-country  
40  
41 261 study reported that comorbidity was more prevalent among the poor and less educated in low  
42  
43 262 income countries.<sup>47</sup> However, these findings were based on self-reported diagnosis, which may  
44  
45 263 introduce concerns of report and recall bias. Previous research in INDEPTH Asian sites has  
46  
47 264 reported inverse associations between comorbidity and markers of socioeconomic status.<sup>48</sup>  
48  
49  
50

51 265 The main implications of the present study are the increased burden of NCDs within  
52  
53 266 Bangladesh, along with other LMICs, and the patterning of more than one risk factor within  
54  
55  
56  
57

1  
2  
3 267 individuals in the population. In contrast to findings from high income countries, prevalence of  
4  
5 268 individual risk factors and comorbidities was higher in higher SES groups. This points to  
6  
7 269 differences between countries in the population level determinants of NCDs and highlights that  
8  
9  
10 270 context specific interventions must be developed to counter them. As a first step, it is important  
11  
12 271 that countries collect and analyse high quality health data to allow them to develop and target  
13  
14  
15 272 interventions.  
16  
17

18 273

## 21 274 **STRENGTHS AND LIMITATIONS**

24 275 The main strengths of the study were the large nationally representative sample and the  
25  
26 276 collection of blood pressure, blood glucose concentration, body weight, and height  
27  
28 277 measurements by health technicians follow standard methods, including biomarker analysis,  
29  
30  
31 278 along with validated measures of socio-economic status. The main weakness of the study is the  
32  
33 279 cross-sectional nature, meaning that only associations can be inferred and causality cannot be  
34  
35  
36 280 determined. In addition although clinical measures of diabetes, hypertension and  
37  
38 281 overweight/obesity were taken, no measurements of blood lipids were taken in the survey,  
39  
40 282 meaning that metabolic syndrome could not be investigated. Waist and hip circumference were  
41  
42 283 also not collected, limiting the analysis that could be performed. Finally although the study was  
43  
44  
45 284 reported to be representative, only participants 35 years or older had measured anthropometry  
46  
47 285 and biomarkers meaning that the findings reflect this population of adults in the country.  
48  
49

50 286

## 53 287 **CONCLUSION**



1  
2  
3 288 In contrast to more affluent countries, individuals of higher socio-economic status in  
4  
5 289 Bangladesh are more likely to exhibit NCD risk factors and comorbidities than individuals from  
6  
7  
8 290 with lower SES status. It is important that we identify the patterning of these conditions within  
9  
10 291 countries if we are to develop effective public health approaches contextualized to the  
11  
12 292 population. This can be done through improved monitoring and surveillance of NCDs, linked to  
13  
14 293 primary care programmes. Such approaches also need policy and system changes, supported by  
15  
16 294 “political will”, societal and community support.  
17  
18  
19 295

## 22 296 **Contributors**

23  
24  
25 297 TB, NT, SKD & AAM conceptualized the study. TB, NT, SKD, RDG & AAM designed the  
26  
27 298 study and acquired the data. TB, SI & MRI conducted the data analysis. TB, NT, SI, MRI, SKD  
28  
29 299 & AAM interpreted the data. TB, NT & RDG prepared the first draft. TB, NT, SKD & AAM  
30  
31 300 participated in critical revision of the manuscript and contributed to its intellectual improvement.  
32  
33 301 All authors went through the final draft and approved it for submission.  
34  
35  
36  
37  
38 302

## 41 303 **Funding**

42  
43  
44 304 None.  
45  
46  
47 305

## 50 306 **Acknowledgments**

1  
2  
3 307 The authors thank MEASURE DHS for permission to use data from the 2011  
4  
5 308 Bangladesh DHS. The authors are also grateful to Mr. Mehedi Hasan, PhD student, University of  
6  
7  
8 309 Queensland, Australia.  
9

10  
11 310 **Competing Interests**  
12

13  
14 311 None declared.  
15

16  
17 312  
18

19  
20 313 **Patient consent**  
21

22  
23 314 None Declared  
24

25  
26 315  
27

28  
29 316 **Disclaimer**  
30

31 317 The authors are alone responsible for the integrity and accuracy of data analysis and the writing  
32  
33 318 the manuscript.  
34

35  
36 319  
37

38  
39 320 **Ethics approval**  
40

41  
42 321 The datasets were obtained from DHS Programme with proper procedure. The study exempt  
43  
44 322 from collecting ethical approval because the survey protocols were reviewed and approved by  
45  
46 323 ICF Macro Institutional Review Board, Maryland, USA and National Research Ethics  
47  
48 324 Committee of Bangladesh Medical Research Council (BMRC), Dhaka, Bangladesh.  
49

50  
51  
52  
53 325  
54  
55  
56  
57

1  
2  
3 326 **Data sharing statement**  
4  
5

6 327 The dataset of BDHS 2011 is available at the Demographic and Health Surveys Program. Extra  
7  
8  
9 328 data is available which is available on request at [http://dhsprogram-com/what-we-](http://dhsprogram-com/what-we-do/survey/survey-display-349.cfm)  
10  
11 329 [do/survey/survey-display-349.cfm](http://dhsprogram-com/what-we-do/survey/survey-display-349.cfm).  
12  
13

14 330  
15

16  
17 331  
18  
19  
20  
21  
22  
23  
24  
25  
26  
27  
28  
29  
30  
31  
32  
33  
34  
35  
36  
37  
38  
39  
40  
41  
42  
43  
44  
45  
46  
47  
48  
49  
50  
51  
52  
53  
54  
55  
56  
57

**References:**

1. Murray CJ, Vos T, Lozano R, et al. Disability-adjusted life years (DALYs) for 291 diseases and injuries in 21 regions, 1990–2010: a systematic analysis for the Global Burden of Disease Study 2010. *Lancet*. 2013;380(9859):2197-223. doi: 10.1016/S0140-6736(12)61689-4.
2. Lozano R, Naghavi M, Foreman K, et al. Global and regional mortality from 235 causes of death for 20 age groups in 1990 and 2010: a systematic analysis for the Global Burden of Disease Study 2010. *Lancet*. 2013;380(9859):2095-128. doi: 10.1016/S0140-6736(12)61728-0
3. Bennett D, Bisanzio D, Deribew A, et al. Global, regional, and national under-5 mortality, adult mortality, age-specific mortality, and life expectancy, 1970–2016: a systematic analysis for the Global Burden of Disease Study 2016. *Lancet*. 2017;390(10100):1084-1150. doi: 10.1016/s0140-6736(17)31833-0.
4. World Health Organization. Global status report on noncommunicable diseases 2010. Geneva: World Health Organization; 2011. 161 p.
5. Abegunde DO, Mathers CD, Adam T, et al. The burden and costs of chronic diseases in low-income and middle-income countries. *Lancet*. 2007;370(9603):1929-38. doi: 10.1016/S0140-6736(07)61696-1
6. Lee JT, Hamid F, Pati S, et al. Impact of noncommunicable disease multimorbidity on healthcare utilisation and out-of-pocket expenditures in middle-income countries: cross sectional analysis. *PLoS One*. 2015;10(7):e0127199. doi: 10.1371/journal.pone.0127199.
7. World Health Organization. Global status report on noncommunicable diseases 2014. Geneva: World Health Organization; 2015. 280 p.
8. Streatfield PK, Karar ZA. Population challenges for Bangladesh in the coming decades. *J Health Popul Nutr*. 2008;26(3):261.

- 1  
2  
3 355 9. National Institute of Population Research and Training (NIPORT), Mitra and Associates,  
4  
5 356 ICF International. Bangladesh Urban Health Survey 2013.. Dhaka, Bangladesh, Calverton,  
6  
7 357 Maryland, USA: NIPORT, Mitra and Associates, and ICF International., 2015.  
8  
9  
10 358 10. Ahsan KZ, Alam MN, Streatfield PK, et al. Has Bangladesh Entered the Fourth Stage of  
11  
12 359 the Epidemiologic Transition?. Proceedings of the International seminar on Mortality: Past,  
13  
14 360 Present and Future; 2017Aug 7-8; the University of Campinas, Brazil.  
15  
16  
17 361 11. Zaman MM, Bhuiyan MR, Karim MN, et al. Clustering of non-communicable diseases  
18  
19 362 risk factors in Bangladeshi adults: an analysis of STEPS survey 2013. *BMC Public Health*.  
20  
21 363 2015;15(1):659. doi: 10.1186/s12889-015-1938-4.  
22  
23  
24 364 12. Hillas G, Perlikos F, Tsiligianni I, et al. Managing comorbidities in COPD. *Int J Chron*  
25  
26 365 *Obstruct Pulmon Dis*.2015;10:95. doi: 10.2147/COPD.S54473.  
27  
28  
29 366 13. Roberts KC, Rao DP, Bennett TL, et al. Prevalence and patterns of chronic disease  
30  
31 367 multimorbidity and associated determinants in Canada. *Health Promot Chronic Dis Prev*  
32  
33 368 *Can*. 2015 ;35(6):87-94.  
34  
35  
36 369 14. Wang J, Ma JJ, Liu J, et al. Prevalence and Risk Factors of Comorbidities among  
37  
38 370 Hypertensive Patients in China. *Int J Med Sci*. 2017;14(3):201. doi: 10.7150/ijms.16974.  
39  
40 371 15. Hurst C, Thinkhamrop B. The association between hypertension comorbidity and  
41  
42 372 microvascular complications in type 2 diabetes patients: A nationwide cross-sectional study in  
43  
44 373 Thailand. *Diabetes Metab J*. 2015;39(5):395-404. doi: 10.4093/dmj.2015.39.5.395  
45  
46  
47 374 19. Allen L, Williams J, Townsend N, et al. Socioeconomic status and non-communicable  
48  
49 375 disease behavioural risk factors in low-income and lower-middle-income countries: a systematic  
50  
51 376 review. *Lancet Glob Health*. 2017;5(3):e277-e89. doi: 10.1016/S2214-109X(17)30058-X.  
52  
53  
54  
55  
56  
57

- 1  
2  
3 377 20. Varghese C. Reducing premature mortality from non-communicable diseases, including  
4  
5 378 for people with severe mental disorders. *World Psychiatry*. 2017;16(1):45-7. doi:  
6  
7 379 10.1002/wps.20376.  
8  
9  
10 380 21. National Institute of Population Research and Training (NIPORT), Mitra and Associates,  
11  
12 381 ICF International. Bangladesh Demographic and Health Survey 2011, Preliminary Report.  
13  
14 382 Dhaka, Bangladesh, Calverton, Maryland, USA: NIPORT, Mitra and Associates, and ICF  
15  
16 383 International., 2012.  
17  
18  
19 384 22. Biswas T, Islam MS, Linton N, et al. Socio-economic inequality of chronic non-  
20  
21 385 communicable diseases in Bangladesh. *PloS One*. 2016;11(11):e0167140. doi:  
22  
23 386 10.1371/journal.pone.0167140.  
24  
25  
26 387 23. Akter S, Rahman MM, Abe SK, et al. Prevalence of diabetes and prediabetes and their  
27  
28 388 risk factors among Bangladeshi adults: a nationwide survey. *Bull World Health Organ*.  
29  
30 389 2014;92(3):204-13A. doi: 10.2471/BLT.13.128371.  
31  
32  
33 390 24. Ke-You G, Da-Wei F. The magnitude and trends of under-and over-nutrition in Asian  
34  
35 391 countries. *Biomed Environ Sci*. 2001;14(1-2):53-60.  
36  
37  
38 392 25. National Institute of Population Research and Training (NIPORT), Mitra and Associates,  
39  
40 393 ICF International. Bangladesh Demographic and Health Survey 2011. Dhaka, Bangladesh,  
41  
42 394 Calverton, Maryland, USA: NIPORT, Mitra and Associates, and ICF International., 2013.  
43  
44  
45 395 26. Rahman M, Williams G, Al Mamun A. Hypertension and diabetes prevalence among  
46  
47 396 adults with moderately increased BMI (23· 0–24· 9 kg/m<sup>2</sup>): findings from a nationwide survey  
48  
49 397 in Bangladesh. *Public Health Nutr*. 2017:1-8. doi: 10.1017/S1368980016003566.  
50  
51  
52  
53  
54  
55  
56  
57

- 1  
2  
3 398 27. Biswas T, Uddin MJ, Al Mamun A, et al. Increasing prevalence of overweight and  
4  
5 399 obesity in Bangladeshi women of reproductive age: Findings from 2004 to 2014. *PloS One*.  
6  
7 400 2017;12(7):e0181080. doi: 10.1371/journal.pone.0181080.  
8  
9  
10 401 28. Hoque ME, Hasan MT, Rahman M, et al. Double burden of underweight and overweight  
11  
12 402 among Bangladeshi adults differs between men and women: evidence from a nationally  
13  
14 403 representative survey. *Public Health Nutr.*2017;20(12):2183-91. doi:  
15  
16 404 10.1017/S1368980017000957.  
17  
18  
19 405 29. Biswas T, Garnett SP, Pervin S, et al. The prevalence of underweight, overweight and  
20  
21 406 obesity in Bangladeshi adults: Data from a national survey. *PloS One*. 2017;12(5):e0177395. doi:  
22  
23 407 10.1371/journal.pone.0177395.  
24  
25  
26 408 30. Dietz WH. Double-duty solutions for the double burden of malnutrition. *Lancet*. 2017.  
27  
28 409 doi: 10.1016/S0140-6736(17)32479-0.  
29  
30  
31 410 31. Bhowmik B, Afsana F, Ahmed T, et al. Obesity and associated type 2 diabetes and  
32  
33 411 hypertension in factory workers of Bangladesh. *BMC Res Notes*.2015;8(1):460. doi:  
34  
35 412 10.1186/s13104-015-1377-4.  
36  
37  
38 413 32. Pradeepa R. The rising burden of diabetes and hypertension in southeast asian and african  
39  
40 414 regions: need for effective strategies for prevention and control in primary health care settings.  
41  
42 415 *Int J Hypertens*. 2013;2013. doi: 10.1155/2013/409083.  
43  
44  
45 416 33. Sola A, Chinyere O, Stephen A, et al. Hypertension prevalence in an urban and rural area of  
46  
47 417 Nigeria. *J Med Sci*. 2013;4:149-54.  
48  
49 418 34. Berraho M, El Achhab Y, Benslimane A, et al. Hypertension and type 2 diabetes: a cross-  
50  
51 419 sectional study in Morocco (EPIDIAM Study). *Pan Afr Med J*. 2012;11(1).  
52  
53  
54  
55  
56  
57

- 1  
2  
3 420 35. Hashemizadeh H, Sarvelayati D. Hypertension and Type 2 Diabetes: A Cross-sectional  
4  
5 421 Study in Hospitalized Patients in Quchan, Iran. *Iran J Diabetes Obesity*. 2013;5(1):21-6.  
6  
7 422 36. Hussain MA, Huxley RR, Al Mamun A. Multimorbidity prevalence and pattern in  
8  
9 423 Indonesian adults: an exploratory study using national survey data. *BMJ Open*.  
10  
11 424 2015;5(12):e009810. doi: 10.1136/bmjopen-2015-009810.  
12  
13  
14 425 37. Howitt C, Hambleton IR, Rose AM, et al. Social distribution of diabetes, hypertension  
15  
16 426 and related risk factors in Barbados: a cross-sectional study. *BMJ Open*. 2015;5(12):e008869.  
17  
18 427 doi: 10.1136/bmjopen-2015-008869.  
19  
20  
21 428 38. Pearson TA. Education and income: double-edged swords in the epidemiologic transition  
22  
23 429 of cardiovascular disease. *Ethn Dis*. 2003;13(2; SUPP/2):S2-158.  
24  
25  
26 430 39. Agborsangaya CB, Lau D, Lahtinen M, et al. Multimorbidity prevalence and patterns  
27  
28 431 across socioeconomic determinants: a cross-sectional survey. *BMC Public Health*.  
29  
30 432 2012;12(1):201. doi: 10.1186/1471-2458-12-201.  
31  
32  
33 433 40. Rahman M, Williams G, Al Mamun A. Gender differences in hypertension awareness,  
34  
35 434 antihypertensive use and blood pressure control in Bangladeshi adults: findings from a national  
36  
37 435 cross-sectional survey. *J Health Popul Nutr*. 2017;36(1):23. doi: 10.1186/s41043-017-0101-5.  
38  
39  
40 436 41. Li G, Hu H, Dong Z, et al. Urban and suburban differences in hypertension trends and  
41  
42 437 self-care: Three population-based cross-sectional studies from 2005-2011. *PloS One*.  
43  
44 438 2015;10(2):e0117999. doi: 10.1371/journal.pone.0117999.  
45  
46  
47 439 42. Dhungana RR, Pandey AR, Bista B, et al. Prevalence and associated factors of  
48  
49 440 hypertension: a community-based cross-sectional study in municipalities of Kathmandu, Nepal.  
50  
51 441 *Int J Hypertens*. 2016;2016. doi: 10.1155/2016/1656938.  
52  
53  
54  
55  
56  
57



- 1  
2  
3 442 43. Chowdhury MAB, Uddin MJ, Haque MR, et al. Hypertension among adults in  
4  
5 443 Bangladesh: evidence from a national cross-sectional survey. *BMC Cardiovasc Disord.*  
6  
7 444 2016;16(1):22. doi: 10.1186/s12872-016-0197-3.  
8  
9  
10 445 44. Akter S, Rahman MM, Abe SK, et al. Prevalence of diabetes and prediabetes and their  
11  
12 446 risk factors among Bangladeshi adults: a nationwide survey. *Bull World Health*  
13  
14 447 *Organ.*2014;92(3):204-13A. doi: 10.2471/BLT.13.128371  
15  
16  
17 448 45. Connolly V, Unwin N, Sherriff P, et al. Diabetes prevalence and socioeconomic status: a  
18  
19 449 population based study showing increased prevalence of type 2 diabetes mellitus in deprived  
20  
21 450 areas. *J Epidemiol Community Health.*2000;54(3):173-7.  
22  
23  
24 451 46. Glover JD, Hetzel DM, Tennant SK. The socioeconomic gradient and chronic illness and  
25  
26 452 associated risk factors in Australia. *Aust New Zealand Health Policy.* 2004;1(1):8. doi:  
27  
28 453 10.1186/1743-8462-1-8.  
29  
30  
31 454 47. Hosseinpoor AR, Bergen N, Mendis S, et al. Socioeconomic inequality in the prevalence  
32  
33 455 of noncommunicable diseases in low-and middle-income countries: results from the World  
34  
35 456 Health Survey. *BMC Public Health.* 2012;12(1):474. doi: 10.1186/s12889-015-2227-y.  
36  
37  
38 457 48. Van Minh H, Ng N, Juvekar S, et al. Self-reported prevalence of chronic diseases and  
39  
40 458 their relation to selected sociodemographic variables: a study in INDEPTH Asian sites, 2005.  
41  
42 459 *Prev Chronic Dis.*2008;5(3).  
43  
44  
45  
46  
47  
48  
49  
50  
51  
52  
53  
54  
55  
56  
57

1  
2  
3 **460 Figures:**  
4

5  
6 **461 Fig 1.** Scatter plot between age with blood glucose, systolic blood pressure, diastolic blood  
7  
8 **462** pressure and BMI.  
9

10 **463 Fig 2.** Prevalence of diabetes, hypertension, overweight and comorbidity by sex among  
11  
12  
13 **464 Bangladeshi adults**  
14

15  
16 **465**  
17

18  
19 **466 Supplementary Materials:**  
20

21  
22 **467 Supplementary File 1:** STROBE Checklist  
23

24  
25 **468 Supplementary File 2:** Modified stepwise Poisson regression models showing prevalence ratios  
26  
27 **469** (PR) and 95% confidence intervals for comorbidities by demographic characteristics among  
28  
29  
30 **470** Bangladeshi adults.  
31

1  
2  
3  
4  
5  
6  
7  
8  
9  
10  
11  
12  
13  
14  
15  
16  
17  
18  
19  
20  
21  
22  
23  
24  
25  
26  
27  
28  
29  
30  
31  
32  
33  
34  
35  
36  
37  
38  
39  
40  
41  
42  
43  
44  
45  
46  
47  
48  
49  
50  
51  
52  
53  
54  
55  
56  
57  
58  
59  
60

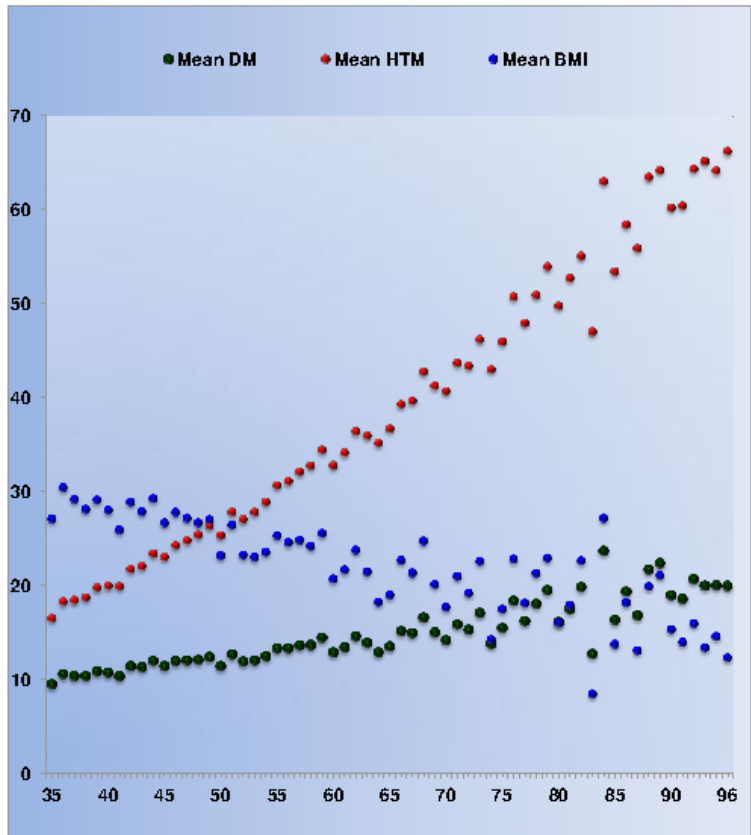

51x67mm (300 x 300 DPI)

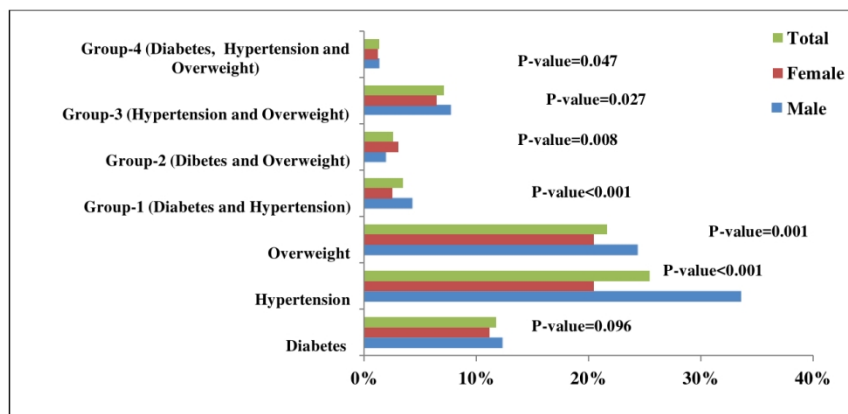

127x62mm (300 x 300 DPI)

**STROBE 2007 (v4) Statement—Checklist of items that should be included in reports of *cross-sectional studies***

***Title of the study:* Association between high socioeconomic status with greater prevalence of non-communicable diseases risk factors and comorbidities in Bangladesh: Findings from a nationwide cross-sectional survey**

| Section/Topic             | Item # | Recommendation                                                                                                                                                                       | Reported on page # |
|---------------------------|--------|--------------------------------------------------------------------------------------------------------------------------------------------------------------------------------------|--------------------|
| Title and abstract        | 1      | (a) Indicate the study’s design with a commonly used term in the title or the abstract                                                                                               | 1                  |
|                           |        | (b) Provide in the abstract an informative and balanced summary of what was done and what was found                                                                                  | 3-4                |
| <b>Introduction</b>       |        |                                                                                                                                                                                      |                    |
| Background/rationale      | 2      | Explain the scientific background and rationale for the investigation being reported                                                                                                 | 6-7                |
| Objectives                | 3      | State specific objectives, including any prespecified hypotheses                                                                                                                     | 7                  |
| <b>Methods</b>            |        |                                                                                                                                                                                      |                    |
| Study design              | 4      | Present key elements of study design early in the paper                                                                                                                              | 7-8                |
| Setting                   | 5      | Describe the setting, locations, and relevant dates, including periods of recruitment, exposure, follow-up, and data collection                                                      | 7-8                |
| Participants              | 6      | (a) Give the eligibility criteria, and the sources and methods of selection of participants                                                                                          | 7-8                |
| Variables                 | 7      | Clearly define all outcomes, exposures, predictors, potential confounders, and effect modifiers. Give diagnostic criteria, if applicable                                             | 8-9                |
| Data sources/ measurement | 8*     | For each variable of interest, give sources of data and details of methods of assessment (measurement). Describe comparability of assessment methods if there is more than one group | 8-9                |
| Bias                      | 9      | Describe any efforts to address potential sources of bias                                                                                                                            | 9                  |
| Study size                | 10     | Explain how the study size was arrived at                                                                                                                                            | 9                  |
| Quantitative variables    | 11     | Explain how quantitative variables were handled in the analyses. If applicable, describe which groupings were chosen and why                                                         | 9                  |
| Statistical methods       | 12     | (a) Describe all statistical methods, including those used to control for confounding                                                                                                | 9                  |
|                           |        | (b) Describe any methods used to examine subgroups and interactions                                                                                                                  | Not applicable     |

|                          |     |                                                                                                                                                                                                              |                |
|--------------------------|-----|--------------------------------------------------------------------------------------------------------------------------------------------------------------------------------------------------------------|----------------|
|                          |     | (c) Explain how missing data were addressed                                                                                                                                                                  | Not applicable |
|                          |     | (d) If applicable, describe analytical methods taking account of sampling strategy                                                                                                                           | Not applicable |
|                          |     | (e) Describe any sensitivity analyses                                                                                                                                                                        | Not applicable |
| <b>Results</b>           |     |                                                                                                                                                                                                              |                |
| Participants             | 13* | (a) Report numbers of individuals at each stage of study—eg numbers potentially eligible, examined for eligibility, confirmed eligible, included in the study, completing follow-up, and analysed            | 10-12          |
|                          |     | (b) Give reasons for non-participation at each stage                                                                                                                                                         | Not applicable |
|                          |     | (c) Consider use of a flow diagram                                                                                                                                                                           | Not applicable |
| Descriptive data         | 14* | (a) Give characteristics of study participants (eg demographic, clinical, social) and information on exposures and potential confounders                                                                     | 10-12          |
|                          |     | (b) Indicate number of participants with missing data for each variable of interest                                                                                                                          | Not applicable |
| Outcome data             | 15* | Report numbers of outcome events or summary measures                                                                                                                                                         | 11-22          |
| Main results             | 16  | (a) Give unadjusted estimates and, if applicable, confounder-adjusted estimates and their precision (eg, 95% confidence interval). Make clear which confounders were adjusted for and why they were included | 11-22          |
|                          |     | (b) Report category boundaries when continuous variables were categorized                                                                                                                                    | Not applicable |
|                          |     | (c) If relevant, consider translating estimates of relative risk into absolute risk for a meaningful time period                                                                                             | Not applicable |
| Other analyses           | 17  | Report other analyses done—eg analyses of subgroups and interactions, and sensitivity analyses                                                                                                               | Not applicable |
| <b>Discussion</b>        |     |                                                                                                                                                                                                              |                |
| Key results              | 18  | Summarise key results with reference to study objectives                                                                                                                                                     | 23             |
| Limitations              | 19  | Discuss limitations of the study, taking into account sources of potential bias or imprecision. Discuss both direction and magnitude of any potential bias                                                   | 25-26          |
| Interpretation           | 20  | Give a cautious overall interpretation of results considering objectives, limitations, multiplicity of analyses, results from similar studies, and other relevant evidence                                   | 23-25          |
| Generalisability         | 21  | Discuss the generalisability (external validity) of the study results                                                                                                                                        | 23-25          |
| <b>Other information</b> |     |                                                                                                                                                                                                              |                |
| Funding                  | 22  | Give the source of funding and the role of the funders for the present study and, if applicable, for the original study on which the present article is based                                                | 26             |

\*Give information separately for cases and controls in case-control studies and, if applicable, for exposed and unexposed groups in cohort and cross-sectional studies.

1  
2  
3  
4  
5  
6  
7  
8  
9  
10  
11  
12  
13  
14  
15  
16  
17  
18  
19  
20  
21  
22  
23  
24  
25  
26  
27  
28  
29  
30  
31  
32  
33  
34  
35  
36  
37  
38  
39  
40  
41  
42  
43  
44  
45  
46

**Note:** An Explanation and Elaboration article discusses each checklist item and gives methodological background and published examples of transparent reporting. The STROBE checklist is best used in conjunction with this article (freely available on the Web sites of PLoS Medicine at <http://www.plosmedicine.org/>, Annals of Internal Medicine at <http://www.annals.org/>, and Epidemiology at <http://www.epidem.com/>). Information on the STROBE Initiative is available at [www.strobe-statement.org](http://www.strobe-statement.org).

For peer review only

**Table: Modified stepwise Poisson regression models showing prevalence ratios (PR) and 95% confidence intervals for co-morbidities by demographic characteristics among Bangladeshi adults.**

|                                                       | <b>Group-A<br/>(Diabetes and hypertension )</b> | <b>Group-B<br/>(Diabetes and overweight/obesity)</b> | <b>Group-C<br/>(Hypertension and overweight/obesity)</b> | <b>Group-D<br/>(Diabetes, hypertension and overweight/obesity)</b> |
|-------------------------------------------------------|-------------------------------------------------|------------------------------------------------------|----------------------------------------------------------|--------------------------------------------------------------------|
| <b>Model-1 (Wealth index )</b>                        |                                                 |                                                      |                                                          |                                                                    |
| <i>Wealth index</i>                                   |                                                 |                                                      |                                                          |                                                                    |
| Richest                                               | 3.94 (2.42-6.41)**                              | 9.69 (4.84-19.4) **                                  | 6.83 (4.66-10) **                                        | 8.67 (3.65-20.56) **                                               |
| Richer                                                | 1.52 (0.88-2.61)                                | 3.39 (1.61-7.16) **                                  | 3.78 (2.53-5.64) **                                      | 2.44 (0.95-6.31)                                                   |
| Middle                                                | 0.9 (0.47-1.71)                                 | 1.63 (0.69-3.81)                                     | 1.3 (0.81-2.07)                                          | 1.17 (0.37-3.7)                                                    |
| Poorer                                                | 0.9 (0.47-1.73)                                 | 0.81 (0.31-2.16)                                     | 1.13 (0.7-1.84)                                          | 0.79 (0.24-2.64)                                                   |
| Poorest                                               | Ref                                             | Ref                                                  | Ref                                                      | Ref                                                                |
| <b>Model-2 (Wealth index + sex)</b>                   |                                                 |                                                      |                                                          |                                                                    |
| <i>Wealth index</i>                                   |                                                 |                                                      |                                                          |                                                                    |
| Richest                                               | 3.93 (2.42-6.39) **                             | 9.68 (4.84-19.35) **                                 | 6.88 (4.7-10.08) **                                      | 8.69 (3.68-20.5) **                                                |
| Richer                                                | 1.51 (0.88-2.6)                                 | 3.39 (1.61-7.14) **                                  | 3.82 (2.56-5.69) **                                      | 2.45 (0.96-6.3)                                                    |
| Middle                                                | 0.9 (0.47-1.71)                                 | 1.62 (0.69-3.8)                                      | 1.31 (0.82-2.09)                                         | 1.17 (0.37-3.69)                                                   |
| Poorer                                                | 0.89 (0.47-1.71)                                | 0.81 (0.31-2.15)                                     | 1.16 (0.72-1.89)                                         | 0.8 (0.24-2.63)                                                    |
| Poorest                                               | Ref                                             | Ref                                                  | Ref                                                      | Ref                                                                |
| <i>Sex</i>                                            |                                                 |                                                      |                                                          |                                                                    |
| Female                                                | 0.85 (0.43-1.66)                                | 0.95 (0.49-1.85)                                     | 1.66 (1.22-2.26) **                                      | 1.21 (0.53-2.74)                                                   |
| Male                                                  | Ref                                             | Ref                                                  | Ref                                                      | Ref                                                                |
| <b>Model-3 (Wealth index + sex+ age )</b>             |                                                 |                                                      |                                                          |                                                                    |
| <i>Wealth index</i>                                   |                                                 |                                                      |                                                          |                                                                    |
| Richest                                               | 4.04 (2.49-6.56) **                             | 9.65 (4.82-19.3) **                                  | 6.92 (4.73-10.13) **                                     | 8.82 (3.74-20.82) **                                               |
| Richer                                                | 1.51 (0.88-2.59)                                | 3.4 (1.61-7.14) **                                   | 3.81 (2.55-5.67) **                                      | 2.44 (0.95-6.26)                                                   |
| Middle                                                | 0.88 (0.46-1.67)                                | 1.63 (0.7-3.81)                                      | 1.3 (0.81-2.07)                                          | 1.15 (0.37-3.65)                                                   |
| Poorer                                                | 0.86 (0.45-1.64)                                | 0.82 (0.31-2.15)                                     | 1.15 (0.71-1.87)                                         | 0.78 (0.24-2.57)                                                   |
| Poorest                                               | Ref                                             | Ref                                                  | Ref                                                      | Ref                                                                |
| <i>Sex</i>                                            |                                                 |                                                      |                                                          |                                                                    |
| Female                                                | 0.75 (0.39-1.46)                                | 0.97 (0.5-1.88)                                      | 1.61 (1.18-2.19) **                                      | 1.13 (0.5-2.54)                                                    |
| Male                                                  | Ref                                             | Ref                                                  | Ref                                                      | Ref                                                                |
| <i>Age</i>                                            |                                                 |                                                      |                                                          |                                                                    |
| Older                                                 | 2.34 (1.71-3.2) **                              | 0.88 (0.65-1.2)                                      | 1.23 (1.03-1.47) **                                      | 1.6 (1.05-2.42) **                                                 |
| Younger                                               | Ref                                             | Ref                                                  | Ref                                                      | Ref                                                                |
| <b>Model-4 (Wealth index + sex+ age + education )</b> |                                                 |                                                      |                                                          |                                                                    |



|                                                                    |                     |                      |                      |                      |
|--------------------------------------------------------------------|---------------------|----------------------|----------------------|----------------------|
| <b>Wealth index</b>                                                |                     |                      |                      |                      |
| Richest                                                            | 3.62 (2.16-6.07) ** | 7.84 (3.74-16.45) ** | 6.76 (4.55-10.03) ** | 7.56 (3.11-18.42) ** |
| Richer                                                             | 1.45 (0.84-2.51)    | 2.98 (1.37-6.5)      | 3.77 (2.53-5.63) **  | 2.24 (0.87-5.8)      |
| Middle                                                             | 0.87 (0.46-1.64)    | 1.5 (0.65-3.5)       | 1.28 (0.81-2.05)     | 1.1 (0.36-3.36)      |
| Poorer                                                             | 0.85 (0.45-1.63)    | 0.78 (0.29-2.09)     | 1.15 (0.71-1.86)     | 0.77 (0.23-2.51)     |
| Poorest                                                            | Ref                 | Ref                  | Ref                  | Ref                  |
| <b>Sex</b>                                                         |                     |                      |                      |                      |
| Female                                                             | 0.76 (0.39-1.49)    | 1.04 (0.53-2.05)     | 1.62 (1.18-2.22) **  | 1.19 (0.52-2.71)     |
| Male                                                               | Ref                 | Ref                  | Ref                  | Ref                  |
| <b>Age</b>                                                         |                     |                      |                      |                      |
| Older                                                              | 2.45 (1.79-3.36) ** | 0.97 (0.7-1.34)      | 1.25 (1.04-1.51) **  | 1.72 (1.11-2.65) **  |
| Younger                                                            | Ref                 | Ref                  | Ref                  | Ref                  |
| <b>Education</b>                                                   |                     |                      |                      |                      |
| College or higher                                                  | 1.54 (0.96-2.5)     | 1.73 (1.06-2.83) **  | 1.21 (0.91-1.61)     | 1.59 (0.85-2.97)     |
| Secondary                                                          | 0.97 (0.62-1.51)    | 1.22 (0.74-2.01)     | 0.84 (0.64-1.12)     | 1.12 (0.59-2.15)     |
| Primary                                                            | 0.96 (0.64-1.42)    | 1.35 (0.85-2.14)     | 1.13 (0.9-1.43)      | 1.17 (0.65-2.11)     |
| No education, preschool                                            | Ref                 | Ref                  | Ref                  | Ref                  |
| <b>Model-5 ( Wealth index + sex+ age + education+ occupation )</b> |                     |                      |                      |                      |
| <b>Wealth index</b>                                                |                     |                      |                      |                      |
| Richest                                                            | 2.72 (1.6-4.61) **  | 5.3 (2.54-11.05) **  | 4.97 (3.37-7.33) **  | 5.47 (2.32-12.91) ** |
| Richer                                                             | 1.18 (0.69-2.04)    | 2.29 (1.06-4.95) **  | 3.06 (2.06-4.53) **  | 1.79 (0.71-4.49)     |
| Middle                                                             | 0.75 (0.4-1.41)     | 1.24 (0.54-2.85)     | 1.11 (0.7-1.76)      | 0.93 (0.31-2.76)     |
| Poorer                                                             | 0.78 (0.41-1.49)    | 0.72 (0.27-1.88)     | 1.06 (0.65-1.7)      | 0.7 (0.22-2.26)      |
| Poorest                                                            | Ref                 | Ref                  | Ref                  | Ref                  |
| <b>Sex</b>                                                         |                     |                      |                      |                      |
| Female                                                             | 0.67 (0.35-1.31)    | 0.91 (0.47-1.78)     | 1.44 (1.06-1.96) **  | 1.05 (0.47-2.37)     |
| Male                                                               | Ref                 | Ref                  | Ref                  | Ref                  |
| <b>Age</b>                                                         |                     |                      |                      |                      |
| Older                                                              | 2.13 (1.54-2.94) ** | 0.86 (0.62-1.19)     | 1.11 (0.91-1.34)     | 1.54 (1.00-2.38) **  |
| Younger                                                            | Ref                 | Ref                  | Ref                  | Ref                  |
| <b>Education</b>                                                   |                     |                      |                      |                      |
| College or higher                                                  | 1.4 (0.86-2.28)     | 1.54 (0.94-2.51)     | 1.09 (0.82-1.45)     | 1.44 (0.77-2.71)     |
| Secondary                                                          | 1.05 (0.67-1.64)    | 1.32 (0.8-2.18)      | 0.9 (0.68-1.2)       | 1.22 (0.63-2.35)     |
| Primary                                                            | 1.03 (0.69-1.53)    | 1.41 (0.89-2.25)     | 1.18 (0.93-1.49)     | 1.24 (0.68-2.26)     |
| No education, preschool                                            | Ref                 | Ref                  | Ref                  | Ref                  |
| <b>Occupational</b>                                                |                     |                      |                      |                      |
| Non-manual                                                         | 3.32 (1.97-5.59) ** | 4.25 (2.27-7.97) **  | 3.04 (2.19-4.23) **  | 3.79 (1.67-8.61) **  |

|                                                                                        |                     |                     |                     |                      |
|----------------------------------------------------------------------------------------|---------------------|---------------------|---------------------|----------------------|
| Manual                                                                                 | Ref                 | Ref                 | Ref                 | Ref                  |
| <b>Model-5 ( Wealth index + sex+ age + education+ occupation+ place of residence )</b> |                     |                     |                     |                      |
| <b>Wealth index</b>                                                                    |                     |                     |                     |                      |
| Richest                                                                                | 2.32 (1.32-4.1) **  | 4.84 (2.26-10.4) ** | 4.85 (3.25-7.24) ** | 3.99 (1.58-10.11) ** |
| Richer                                                                                 | 1.12 (0.66-1.91)    | 2.22 (1.02-4.8)     | 3.03 (2.04-4.49)    | 1.59 (0.65-3.92)     |
| Middle                                                                                 | 0.74 (0.39-1.38)    | 1.23 (0.54-2.82)    | 1.1 (0.69-1.75)     | 0.9 (0.31-2.64)      |
| Poorer                                                                                 | 0.78 (0.41-1.48)    | 0.71 (0.27-1.88)    | 1.06 (0.65-1.7)     | 0.7 (0.22-2.24)      |
| Poorest                                                                                | Ref                 | Ref                 | Ref                 | Ref                  |
| <b>Sex</b>                                                                             |                     |                     |                     |                      |
| Female                                                                                 | 0.67 (0.35-1.31)    | 0.91 (0.47-1.78)    | 1.44 (1.06-1.96) ** | 1.05 (0.46-2.36)     |
| Male                                                                                   | Ref                 | Ref                 | Ref                 | Ref                  |
| <b>Age</b>                                                                             |                     |                     |                     |                      |
| Older                                                                                  | 2.17 (1.58-2.99) ** | 0.87 (0.62-1.21)    | 1.11 (0.91-1.35)    | 1.61 (1.05-2.49) **  |
| Younger                                                                                | Ref                 | Ref                 | Ref                 | Ref                  |
| <b>Education</b>                                                                       |                     |                     |                     |                      |
| College or higher                                                                      | 1.38 (0.85-2.25)    | 1.53 (0.93-2.5)     | 1.09 (0.82-1.45)    | 1.4 (0.74-2.63)      |
| Secondary                                                                              | 1.06 (0.68-1.65)    | 1.33 (0.8-2.19)     | 0.91 (0.68-1.2)     | 1.24 (0.65-2.38)     |
| Primary                                                                                | 1.03 (0.69-1.53)    | 1.42 (0.89-2.26)    | 1.18 (0.93-1.5)     | 1.25 (0.69-2.28)     |
| No education, preschool                                                                | Ref                 | Ref                 | Ref                 | Ref                  |
| <b>Occupational</b>                                                                    |                     |                     |                     |                      |
| Non-manual                                                                             | 3.27 (1.94-5.52) ** | 4.22 (2.26-7.9) **  | 3.04 (2.19-4.22) ** | 3.69 (1.63-8.36) **  |
| Manual                                                                                 | Ref                 | Ref                 | Ref                 | Ref                  |
| <b>Place of residence</b>                                                              |                     |                     |                     |                      |
| Urban                                                                                  | 1.33 (0.9-1.95)     | 1.17 (0.8-1.72)     | 1.04 (0.85-1.27)    | 1.72 (0.99-3.01)     |
| Rural                                                                                  | Ref                 | Ref                 | Ref                 | Ref                  |

# BMJ Open

## Association between socioeconomic status and prevalence of non-communicable diseases risk factors and comorbidities in Bangladesh: Findings from a nationwide cross-sectional survey

|                                 |                                                                                                                                                                                                                                                                                                                                                                                                                                                                                                                                                                                                                                                                                                                                        |
|---------------------------------|----------------------------------------------------------------------------------------------------------------------------------------------------------------------------------------------------------------------------------------------------------------------------------------------------------------------------------------------------------------------------------------------------------------------------------------------------------------------------------------------------------------------------------------------------------------------------------------------------------------------------------------------------------------------------------------------------------------------------------------|
| Journal:                        | <i>BMJ Open</i>                                                                                                                                                                                                                                                                                                                                                                                                                                                                                                                                                                                                                                                                                                                        |
| Manuscript ID                   | bmjopen-2018-025538.R3                                                                                                                                                                                                                                                                                                                                                                                                                                                                                                                                                                                                                                                                                                                 |
| Article Type:                   | Research                                                                                                                                                                                                                                                                                                                                                                                                                                                                                                                                                                                                                                                                                                                               |
| Date Submitted by the Author:   | 01-Feb-2019                                                                                                                                                                                                                                                                                                                                                                                                                                                                                                                                                                                                                                                                                                                            |
| Complete List of Authors:       | Biswas, Tuhin; International Centre for Diarrhoeal Disease Research Bangladesh, Universal Health Coverage, Health Systems and Population Studies Division; The University of Queensland, Institute for Social Science Research<br>Townsend, Nick; University of Bath, Department for Health<br>Islam, Md.saimul; University of Rajshahi, Department of Statistics<br>Islam, Md. Rajibul ; Ministry of Public Health, Health Intervention and Technology Assessment Program (HITAP)<br>Das Gupta, Rajat; BRAC University James P Grant School of Public Health,<br>Das, Sumon ; The University of Queensland, Institute for Social Science Research<br>Mamun, Abdullah; University of Queensland, Institute for Social Science Research |
| <b>Primary Subject Heading</b>: | Epidemiology                                                                                                                                                                                                                                                                                                                                                                                                                                                                                                                                                                                                                                                                                                                           |
| Secondary Subject Heading:      | Public health, Diabetes and endocrinology, Cardiovascular medicine                                                                                                                                                                                                                                                                                                                                                                                                                                                                                                                                                                                                                                                                     |
| Keywords:                       | Overweight, DIABETES & ENDOCRINOLOGY, Hypertension < CARDIOLOGY                                                                                                                                                                                                                                                                                                                                                                                                                                                                                                                                                                                                                                                                        |
|                                 |                                                                                                                                                                                                                                                                                                                                                                                                                                                                                                                                                                                                                                                                                                                                        |

SCHOLARONE™  
Manuscripts

1  
2  
3 1 **Title: Association between socioeconomic status and prevalence of non-**  
4  
5  
6 2 **communicable diseases risk factors and comorbidities in Bangladesh:**  
7  
8  
9 3 **Findings from a nationwide cross-sectional survey**  
10  
11  
12 4  
13  
14  
15  
16 5  
17  
18

19 6 **Authors:**

20  
21  
22 7 Tuhin Biswas<sup>1,2\*</sup>, Nick Townsend<sup>3</sup>, Md. Saimul Islam<sup>4</sup>, Md. Rajibul Islam<sup>5</sup>, Rajat Das Gupta<sup>6,7</sup>,  
23  
24 8 Sumon Kumar Das<sup>2</sup>, Abdullah Al Mamun<sup>2</sup>  
25  
26  
27  
28 9

29  
30  
31 10 **Affiliations:**  
32  
33

34 11 <sup>1</sup> Universal Health Coverage, Health Systems and Population Studies Division, icddr,b,  
35  
36 12 Mohakhali, Dhaka, Bangladesh

37  
38  
39 13 <sup>2</sup>Institute for Social Science Research, The University of Queensland, Long Pocket Precinct,  
40  
41 14 Indooroopilly, Queensland, Australia.

42  
43  
44 15 <sup>3</sup> Department for Health, University of Bath, United Kingdom  
45  
46

47  
48 16 <sup>4</sup> University Rajshahi, Rajshahi, Bangladesh.  
49

50  
51 17 <sup>5</sup> Health Intervention and Technology Assessment Program (HITAP), Ministry of Public Health,  
52  
53 18 Nonthaburi, Thailand.  
54  
55  
56  
57

1  
2  
3 19 <sup>6</sup> Centre for Non-Communicable Diseases and Nutrition, BRAC James P Grant School of Public  
4  
5 20 Health, BRAC University, Dhaka, Bangladesh  
6  
7

8  
9 21 <sup>7</sup> Centre for Science of Implementation and Scale-Up, BRAC James P Grant School of Public  
10  
11 22 Health, BRAC University, Dhaka, Bangladesh  
12  
13

14 23 **\*Corresponding author:**

15  
16  
17 24 Biswas Tuhin  
18  
19

20  
21 25 Universal Health Coverage, Health Systems and Population Studies Division, icddr,b,  
22  
23 26 Mohakhali, Dhaka, Bangladesh; Institute for Social Science Research, The University of  
24  
25 27 Queensland, Long Pocket Precinct, Indooroopilly, Queensland, Australia.  
26  
27

28 28 **Email:** tuhin\_sps04@yahoo.com  
29  
30  
31  
32  
33  
34  
35  
36  
37  
38  
39  
40  
41  
42  
43  
44  
45  
46  
47  
48  
49  
50  
51  
52  
53  
54  
55  
56  
57

## 30 ABSTRACT

31 **Objectives:** This study aimed to examine the prevalence and distribution in the comorbidity of  
32 non-communicable diseases (NCD) among the adult population in Bangladesh by measures of  
33 socioeconomic status (SES).

34 **Design:** This was a cross-sectional study.

35 **Setting:** This study used Bangladesh Demographic and Health Survey (2011) data.

36 **Participants:** Total 8,763 individuals aged  $\geq 35$  years were included.

37 **Primary and secondary outcome measures:** The primary outcome measures were diabetes  
38 (DM), hypertension (HTN) and overweight/obesity. The study further assesses factors (in  
39 particular socioeconomic status) associated with these comorbidities (diabetes (DM),  
40 hypertension (HTN) and overweight/obesity).

41 **Results:** Of 8,763 adults, 12% had DM, 27% HTN and 22% were overweight/obese  
42 ( $BMI \geq 23 \text{ kg/m}^2$ ). Just over 1% of the sample had all three conditions, 3% had both DM and  
43 HTN, 3% DM and overweight and 7% HTN and overweight. Diabetes, hypertension and  
44 overweight were more prevalent those who had higher education, were non-manual workers,  
45 were in the richer to richest socioeconomic status and lived in urban settings. Individuals in  
46 higher SES groups were also more likely to suffer from comorbidities. In the multivariable  
47 analysis, it was found that individual belonging to the richest wealth quintile had the highest  
48 odds of having hypertension (Adjusted Odds Ratio (AOR): 1.49, 95% Confidence Interval (CI):  
49 1.29-1.72), diabetes (AOR: 1.63, 95% CI: 1.25-2.14) and obesity (AOR: 4.3, 95% CI: 3.32-  
50 5.57).

1  
2  
3 51  
4  
5  
6  
7 52 **Conclusions:** In contrast to more affluent countries, individuals with NCD risk factors and  
8  
9 53 comorbidities are more common in higher socio-economic status individuals. Public health  
10  
11 54 approaches must consider this social patterning in tackling NCDs in the country.  
12  
13  
14 55  
15  
16  
17  
18 56 **Key words:** Overweight, Diabetes, Hypertension, Non-communicable Disease, socioeconomic  
19  
20 57 status, Bangladesh  
21  
22  
23  
24  
25  
26  
27  
28  
29  
30  
31  
32  
33  
34  
35  
36  
37  
38  
39  
40  
41  
42  
43  
44  
45  
46  
47  
48  
49  
50  
51  
52  
53  
54  
55  
56  
57

## 58 STRENGTHS AND LIMITATIONS OF THE STUDY

- 59 • The biggest strength of the study is that it utilized a large dataset nationally representative of  
60 the Bangladesh population, collected using measures that have been designed and validated  
61 through previous data collections in the country.
- 62 • Data collection included clinical measures of blood pressure, blood glucose concentration,  
63 body weight, and height collected by a health technician.
- 64 • The main weakness of the study is that it is cross-sectional in nature, meaning that only  
65 associations can be inferred and causality cannot be determined.

66



## 67 INTRODUCTION

68 According to the Global Burden of Disease report, non-communicable diseases (NCDs)  
69 are the leading cause of death worldwide<sup>1-3</sup> and that 80% of this NCD mortality actually occurs  
70 in low- and middle-income countries (LMICs)<sup>4-6</sup>. Similarly, the 2014 NCDs global status report  
71 showed that of 58 million deaths that occurred globally in 2012, 38 million - almost two thirds -  
72 were due to NCDs, with these deaths most due to the four most common NCDs: cardiovascular  
73 diseases, cancers, diabetes and chronic lung diseases.<sup>7</sup> In addition, the report showed that more  
74 than 40% of these deaths (16 million) occurred were in individuals under the age of 70 years,  
75 often referred to as premature deaths<sup>7</sup>. Deaths at younger ages may be a greater demonstration of  
76 its burden, as many consider them preventable. It is alarming, therefore, that the majority of  
77 premature deaths (82%) occur in LMICs, with this problem likely to increase if appropriate  
78 preventative actions are not taken at a population level.

79 Like many LMICs, Bangladesh is undergoing rapid urbanization with changing patterns  
80 of diseases among the population<sup>8, 9</sup>, with some suggesting that the country is at an advanced  
81 phase of the third stage of the epidemiologic transition, with deaths from NCDs expected to  
82 increase rapidly in the coming years.<sup>10</sup> This increasing mortality from NCDs in the country is  
83 supported by high prevalence of the medical risk factors associated with NCDs. A recent WHO  
84 STEPS survey in Bangladesh reported that 21% of the population had hypertension, 26% were  
85 overweight and 5% had documented diabetes.<sup>11</sup>

86 These high prevalence figures, raise concerns of comorbidity, in which individuals suffer  
87 from more than one of the risk factors at a time, with this thought to be highly predictive of end  
88 point diseases, disability and death.<sup>12</sup> There is evidence of comorbidity risk for factors including

1  
2  
3 89 obesity, diabetes and hypertension, predominantly coming from industrialized countries<sup>13-15</sup> and  
4  
5 90 developing nations<sup>16-18</sup>; however evidence on NCD comorbidity scant in Bangladesh. This is  
6  
7  
8 91 important as the patterning of NCDs is not uniform across countries of different income  
9  
10 92 classification, with a higher prevalence of some NCD risk factors, such as diabetes, found in  
11  
12 93 higher socio-economic groups in many studies in LMICs, contradicting those from higher  
13  
14  
15 94 income countries.<sup>19</sup>  
16  
17

18 95 With the development of a double burden from both over- and under-nutrition in these  
19  
20 96 LMICs, understanding comorbidity and their correlates is important if we are to develop NCD  
21  
22 97 preventative policies contextualized for these countries. Despite the availability of nationwide  
23  
24  
25 98 survey data in Bangladesh, the prevalence, and in particular the comorbidity of NCD medical  
26  
27 99 risk factors remains unmapped. This understanding of the burden and patterning of NCDs and  
28  
29 100 their risk factors is important if Bangladesh is able to meet the Sustainable Development Goals  
30  
31 101 (SDGs) target of reducing premature death from NCDs by one third by 2030.<sup>20</sup>  
32  
33  
34

35 102 This study used 2011 Bangladesh Demography and Health Survey (BDHS) data to  
36  
37 103 estimate the prevalence and pattern of NCD risk factors and comorbidity among the general  
38  
39 104 population aged 35 years and older, as well as determining their socio-demographic patterning  
40  
41  
42 105 and possible predictors of comorbidity .  
43  
44  
45 106

## 107 **METHODS**

### 108 **Study design**

109 This study used data from the 2011 Bangladesh Demography and Health Survey  
110 (BDHS). The 2011 BDHS is a cross-sectional nationally representative survey that was

1  
2  
3 111 conducted between July and December 2011 through the collaboration of the National Institute  
4  
5 112 of Population Research and Training (NIPORT), ICF International (USA), and Mitra and  
6  
7 113 Associates. Participants in the BDHS were selected using probability sampling based on a two-  
8  
9 114 stage cluster sample of households, and stratified by rural and urban areas in the seven  
10  
11 115 administrative regions of Bangladesh. The detailed protocol and methods have been published  
12  
13 116 previously.<sup>21</sup> In brief, 17,500 households were surveyed, of which one in three households were  
14  
15 117 randomly selected for biomarker measurement (blood glucose, blood pressure). All men and  
16  
17 118 women age 35 years and above were eligible for the biomarker measures, with these collected  
18  
19 119 from a final sample of 8,835 individuals (male: 4524, female: 4311).<sup>22</sup> We included 8763 cases  
20  
21  
22  
23  
24 120 in our analytical sample, after excluding cases with missing values.  
25  
26  
27  
28

121

## 122 **Measurements of outcomes**

123 A data collection team, including a health technician, measured blood pressure, blood  
124 glucose concentration, body weight, and height using standard methods.<sup>21</sup> Diabetes (DM) was  
125 defined as a fasting blood glucose level greater than or equal to 7.0 mmol/L or self-reported  
126 diabetes medication use.<sup>23</sup> Body mass index (BMI) was calculated as weight (kg)/height (m<sup>2</sup>).  
127 We used Asian specific BMI cut-offs to define underweight as <18.5 kg/m<sup>2</sup> and overweight and  
128 obese (higher BMI) as  $\geq 23$  kg/m<sup>2</sup>.<sup>24</sup> Hypertension was defined as systolic blood pressure (SBP)  
129  $\geq 140$  mmHg and diastolic blood pressure (DBP)  $\geq 90$  mmHg or self-reported anti-hypertensive  
130 medication use during the survey.<sup>25</sup> We then categorized comorbidity into four groups such as  
131 respondents having DM and HTN (group A), DM and overweight/obesity (group B), HTN and  
132 overweight/obesity (group C) and group D in which individuals had all three conditions (DM,  
133 HTN and overweight/obesity ).

134

### 135 **Socio-demographic factors**

136 We categorized age as older (defined as 56 years and above) and younger (35 to 55  
137 years).<sup>26</sup> Education status was characterized into five levels: 1) no education, 2) preschool, 3)  
138 primary, 4) secondary and 5) college or higher. We categorized occupation as manual or non-  
139 manual worker and used principle component analysis to determine a wealth index was as  
140 described in the BDHS 2011 report.<sup>21</sup> Place of residence (urban and rural) and sex (male and  
141 female) were also included as important factors.

142

### 143 **Statistical analysis**

144 HTN, DM, overweight/obesity and all possible combinations of the comorbidity  
145 conditions were the main outcomes of interest. For analysis purposes, all outcomes were  
146 dichotomized into persons with or without the risk factor. Sex, age, education, occupation,  
147 wealth index and place of residence were included in analysis as independent variables. We  
148 calculated the weighted prevalence of DM, HTN, overweight/obesity through percentage in the  
149 sample and used modified Poisson regression (PR) models with robust error variance to  
150 calculate prevalence ratios (PR) and 95% confidence interval for DM, HTN and overweight.  
151 These analyses were adjusted for cluster and sample weight and were done using IBMSPSS 21  
152 (IBM Corp. Released 2012. IBMSPSS Statistics for Windows, Version 21.0. Armonk, NY: IBM  
153 Corp.). We also calculated the power to assess whether the existing sample size is enough for  
154 performing the multivariable regression models. The variables sex, age, education, occupation  
155 are control variables and not of primary research interest. The variable wealth index is our  
156 primary interest to assess the association with the joint estimates of NCDs. We have converted

1  
2  
3 157 the log ( PR) to calculate the effect size by the formula  $d = \log(\text{prevalence ratio}) \times (\sqrt{3/\pi})$ . The  
4  
5 158 primary research hypothesis was to test the wealth index from poorer to richest groups with the  
6  
7 159 joint estimate of NCDs in the regression equation. We have considered the power .90, level of  
8  
9 160 significance 0.05 , calculated effect size from prevalence ratio and then we get the estimated  
10  
11 161 sample size for each model of each outcomes which covers the existing sample size of our  
12  
13 162 analysis. We have performed the power analysis using G\*Power software. The authors followed  
14  
15 163 the guidelines outlined in the Strengthening the Reporting of Observational Studies in  
16  
17 164 Epidemiology (*STROBE*) statement in writing the manuscript (Supplementary File 1).  
18  
19  
20  
21  
22  
23  
24

## 166 Ethical consideration and patient involvement

25  
26  
27 167 Patients were not involved in the study. BDHS 2011 received ethical approval from ICF  
28  
29 168 Macro Institutional Review Board, Maryland, USA and National Research Ethics Committee of  
30  
31 169 Bangladesh Medical Research Council (BMRC), Dhaka, Bangladesh. Written informed consent  
32  
33 170 was taken from the participants before the survey was completed.  
34  
35  
36  
37

## 171 FINDINGS

38  
39 172 The study population (n=8763) comprised 51% males, around 56% were 56 years of age  
40  
41 173 or older, 62% reported no education, 25% were in manual employment, and 76% lived in rural  
42  
43 174 locations (Table 1).  
44  
45  
46  
47

175 **Table-1: General characteristics of the study population**

| Variables | n | % |
|-----------|---|---|
| Sex       |   |   |

|                           |      |       |
|---------------------------|------|-------|
| Male                      | 4480 | 51.13 |
| Female                    | 4283 | 48.87 |
| <b>Age</b>                |      |       |
| Younger                   | 3603 | 55.77 |
| Older                     | 2858 | 44.23 |
| <b>Education</b>          |      |       |
| College or higher         | 592  | 6.75  |
| Secondary                 | 1129 | 12.88 |
| Primary                   | 1634 | 18.64 |
| No education, preschool   | 5409 | 61.72 |
| <b>Occupation</b>         |      |       |
| Manual                    | 2142 | 24.89 |
| Non-manual                | 6464 | 75.11 |
| <b>Wealth index</b>       |      |       |
| Poorest                   | 1696 | 19.36 |
| Poorer                    | 1671 | 19.06 |
| Middle                    | 1692 | 19.31 |
| Richer                    | 1784 | 20.35 |
| Richest                   | 1921 | 21.92 |
| <b>Place of residence</b> |      |       |
| Rural                     | 6623 | 75.58 |
| Urban                     | 2140 | 24.42 |

1  
2  
3 176  
4  
5  
6 177 Among the sample 12% had diabetes, 27% had HTN and 22% were classified as  
7  
8 178 overweight/obesity ( $BMI \geq 23 \text{ kg/m}^2$ ). The probability of having diabetes and hypertension  
9  
10 179 increased by increasing age group, whilst the probability of being overweight/obesity was higher  
11  
12 180 in the younger age group (Figure 1). Prevalence of all these conditions were higher amongst  
13  
14 181 males than females. The prevalence of group A (DM and HTN,  $n=270$ ) and group B (DM and  
15  
16 182 overweight/obesity,  $n=191$ ) comorbidities was 3%, whilst 7% of the sample had group C  
17  
18 183 comorbidity (HTN and overweight/obesity,  $n=513$ ). One percent (1%) of the sample all three  
19  
20 184 conditions (DM, HTN and overweight/obesity =104). Prevalence of all groups of comorbidity  
21  
22 185 was higher in males than females, except for group B (DM and overweight/obesity) (Figure 2).  
23  
24 186 The prevalence of individual conditions and all comorbidities was higher amongst older  
25  
26 187 individuals, those with a 'College or higher' education, 'non-manual' workers, people in the  
27  
28 188 richest quintile for wealth index and those living in urban environments (Table 2).  
29  
30  
31  
32  
33  
34  
35 189  
36  
37  
38  
39  
40  
41  
42  
43  
44  
45  
46  
47  
48  
49  
50  
51  
52  
53  
54  
55  
56  
57

| Variables                     | Diabetes<br>(%, 95% CI) | Hypertension<br>(%, 95% CI) | Overweight<br>(%, 95% CI) | Group-A<br>(%, 95% CI)<br>(Diabetes and<br>hypertension ) | Group-B<br>(%, 95% CI)<br>(Diabetes and<br>overweight/obesity<br>) | Group-C<br>(%, 95% CI)<br>(Hypertension and<br>overweight/obesity ) | Group-D<br>(%, 95% CI)<br>(Diabetes,<br>hypertension and<br>overweight/obesity |
|-------------------------------|-------------------------|-----------------------------|---------------------------|-----------------------------------------------------------|--------------------------------------------------------------------|---------------------------------------------------------------------|--------------------------------------------------------------------------------|
| <b>Age</b>                    |                         |                             |                           |                                                           |                                                                    |                                                                     |                                                                                |
| Younger                       | 10.2 (9-11.5)           | 19.2 (17.4-21.1)            | 24.6 (22.7-26.5)          | 2.2 (1.7-2.9)                                             | 3.5 (2.8-4.4)                                                      | 8.5 (7.4-9.8)                                                       | 1.4 (1-2)                                                                      |
| Older                         | 14.7 (12.9-16.7)        | 38.7 (36.3-41.2)            | 18 (16.2-20)              | 5 (4.1-6.1)                                               | 3.3 (2.5-4.3)                                                      | 10.1 (8.8-11.5)                                                     | 2.3 (1.6-3.2)                                                                  |
| <b>Education</b>              |                         |                             |                           |                                                           |                                                                    |                                                                     |                                                                                |
| Higher                        | 22 (18.7-25.8)          | 33.1 (29.4-37)              | 53.9 (49-58.8)            | 7.7 (5.6-10.6)                                            | 8.6 (6.4-11.4)                                                     | 17.5 (14.5-21)                                                      | 4.3 (2.8-6.5)                                                                  |
| Secondary                     | 13.3 (11.4-15.4)        | 27.5 (24.9-30.3)            | 29.7 (26.4-33.2)          | 4.8 (3.7-6.1)                                             | 3.6 (2.6-4.8)                                                      | 7.8 (6.3-9.8)                                                       | 1.8 (1.1-2.9)                                                                  |
| Primary                       | 11.6 (10.2-13.3)        | 23.6 (21.4-25.9)            | 21 (18.6-23.6)            | 3.2 (2.5-4.3)                                             | 2.5 (1.9-3.4)                                                      | 7.1 (5.8-8.5)                                                       | 1.2 (0.8-1.8)                                                                  |
| No<br>education,<br>preschool | 9.5 (8.3-10.8)          | 28 (26.1-30)                | 13.3 (11.9-15)            | 2.5 (1.9-3.1)                                             | 1.2 (0.9-1.8)                                                      | 5.2 (4.4-6.1)                                                       | 0.8 (0.5-1.3)                                                                  |
| <b>Occupation</b>             |                         |                             |                           |                                                           |                                                                    |                                                                     |                                                                                |
| Manual                        | 6.8 (5.6-8.2)           | 14.4 (12.7-16.3)            | 10.5 (9.2-12.1)           | 1 (0.6-1.6)                                               | 0.8 (0.4-1.3)                                                      | 2.7 (2-3.5)                                                         | 0.4 (0.2-0.9)                                                                  |
| Non-manual                    | 13.4 (12.3-14.6)        | 31.5 (29.8-33.1)            | 27.7 (25.8-29.6)          | 4.3 (3.7-5)                                               | 3.2 (2.6-3.9)                                                      | 8.8 (7.9-9.8)                                                       | 1.7 (1.3-2.2)                                                                  |
| <b>Wealth<br/>index</b>       |                         |                             |                           |                                                           |                                                                    |                                                                     |                                                                                |
| Poorest                       | 8.4 (6.9-10.2)          | 20.6 (18.3-23.1)            | 6.6 (5.2-8.5)             | 1.7 (1.1-2.6)                                             | 0.6 (0.3-1.4)                                                      | 2.2 (1.5-3.3)                                                       | 0.4 (0.1-1.1)                                                                  |

190 **Table-2: Weighted prevalence of individual conditions and comorbidities by characteristics**

191



|                           |                  |                  |                  |               |               |                  |               |
|---------------------------|------------------|------------------|------------------|---------------|---------------|------------------|---------------|
| Poorer                    | 8.1 (6.4-10.2)   | 22.6 (20-25.4)   | 10.4 (8.6-12.7)  | 1.7 (1-2.8)   | 0.5 (0.2-1.2) | 2.9 (2.1-4)      | 0.3 (0.1-0.9) |
| Middle                    | 8.2 (6.7-9.9)    | 24.2 (21.9-26.6) | 14.6 (12.3-17.2) | 2 (1.3-2.9)   | 1 (0.5-1.8)   | 3.4 (2.5-4.7)    | 0.4 (0.2-1.1) |
| Richer                    | 11.8 (9.9-14)    | 28.8 (26.4-31.3) | 27.8 (24.7-31.1) | 3.5 (2.6-4.7) | 2.5 (1.8-3.5) | 9.3 (7.9-11)     | 1.2 (0.7-1.9) |
| Richest                   | 20.8 (18.6-23.3) | 38.6 (36.3-41.1) | 47.9 (44.8-51)   | 8.3 (6.8-10)  | 8 (6.5-9.8)   | 17.6 (15.6-19.7) | 4.3 (3.2-5.7) |
| <b>Place of residence</b> |                  |                  |                  |               |               |                  |               |
| Urban                     | 16.5 (14.6-18.5) | 33.3 (31.1-35.5) | 37.4 (34.3-40.7) | 6 (4.9-7.3)   | 5.5 (4.4-6.8) | 12.9 (11.3-14.6) | 3.1 (2.3-4.2) |
| Rural                     | 10.3 (9.3-11.3)  | 25.3 (23.5-27.1) | 17.1 (15.6-18.6) | 2.7 (2.2-3.3) | 1.7 (1.2-2.3) | 5.4 (4.7-6.3)    | 0.8 (0.5-1.3) |

192

1  
2  
3 193 The prevalence ratio (PR), from modified Poisson regression models, of HTN, DM and  
4  
5 194 overweight/obesity was significantly higher among those who had completed higher education,  
6  
7  
8 195 those living in urban areas, non-manual workers and those in the richer to richest socioeconomic  
9  
10 196 status. Although there was no sex disparities for diabetes, HTN and overweight/obesity was  
11  
12 197 higher amongst males. Overweight/obesity was the only condition that was significantly higher  
13  
14  
15 198 among younger participants (Table 3).  
16  
17  
18  
19  
20  
21  
22  
23  
24  
25  
26  
27  
28  
29  
30  
31  
32  
33  
34  
35  
36  
37  
38  
39  
40  
41  
42  
43  
44  
45  
46  
47  
48  
49  
50  
51  
52  
53  
54  
55  
56  
57

199 **Table-3: Modified Poisson regression models showing prevalence ratios (PR) and 95% confidence intervals for diabetes,**  
 200 **hypertension and overweight by demographic characteristics among Bangladeshi adults**

| Variables               | Diabetes            | Hypertension        | Overweight/obesity  |
|-------------------------|---------------------|---------------------|---------------------|
|                         | PR (95% CI)         | PR (95% CI)         | PR (95% CI)         |
| <b>Sex</b>              |                     |                     |                     |
| Female                  | 0.89 (0.74-1.08)    | 0.59 (0.53-0.65) ** | 0.7 (0.62-0.79) **  |
| Male                    | Ref                 | Ref                 | Ref                 |
| <b>Age #</b>            |                     |                     |                     |
| Older                   | 1.48 (1.26-1.73) ** | 1.72 (1.56-1.88) ** | 0.75 (0.67-0.83) ** |
| Younger                 | Ref                 | Ref                 | Ref                 |
| <b>Education</b>        |                     |                     |                     |
| College or higher       | 1.71 (1.32-2.23) ** | 1.36 (1.15-1.61) ** | 2.11 (1.79-2.5) **  |
| Secondary               | 1.16 (0.92-1.48)    | 1.13 (0.99-1.28)    | 1.56 (1.34-1.83) ** |
| Primary                 | 1.21 (0.99-1.48)    | 0.97 (0.87-1.08)    | 1.29 (1.12-1.5) **  |
| No education, preschool | Ref                 | Ref                 | Ref                 |

|                           |                     |                     |                     |
|---------------------------|---------------------|---------------------|---------------------|
| <b>Occupation</b>         |                     |                     |                     |
| Non-manual###             | 1.54 (1.24-1.91) ** | 1.46 (1.28-1.68) ** | 1.62 (1.39-1.90) ** |
| Manual                    | Ref                 | Ref                 | Ref                 |
| <b>Wealth index</b>       |                     |                     |                     |
| Richest                   | 1.63 (1.25-2.14) ** | 1.49 (1.29-1.72) ** | 4.3 (3.32-5.57) **  |
| Richer                    | 1.04 (0.79-1.35)    | 1.24 (1.08-1.42) ** | 3.07 (2.39-3.95) ** |
| Middle                    | 0.77 (0.58-1.03)    | 1.05 (0.91-1.21)    | 1.8 (1.38-2.36) **  |
| Poorer                    | 0.94 (0.71-1.24)    | 1.01 (0.87-1.16)    | 1.45 (1.09-1.92) ** |
| Poorest                   | Ref                 | Ref                 | Ref                 |
| <b>Place of residence</b> |                     |                     |                     |
| Urban                     | 1.1 (0.92-1.32)     | 1.05 (0.95-1.15)    | 1.09 (0.98-1.21)    |
| Rural                     | Ref                 | Ref                 | Ref                 |

202 # Younger-(35–55 years and older (56 years or older) [23].

203 ##\*Non-manual category included sedentary workers, professionals (e.g., doctors, teachers, etc.), housewives, retired persons, those  
204 unable to work and unemployed [24].

205 \*\*Statistical significance at p<0.05

1  
2  
3 206 In univariate Poisson regression models, those in the richest quintile of wealth index had the  
4  
5 207 highest PR for all comorbidity groups. These differences remained significant in all models in a  
6  
7 208 stepwise process (**Supplementary File 2**). In final models, once controlling for sex, age,  
8  
9 209 education, occupation and urbanization, those in the richest quintile were 2.3 times as likely to  
10  
11 210 have DM and HTN, 4.8 times as likely to have DM and overweight/obesity, 4.9 times as likely to  
12  
13 211 have HTN and overweight/obesity and 4.0 times as likely to have all three comorbidities, than  
14  
15 212 those in the poorest quintile. In these final models, non-manual workers were also significantly  
16  
17 213 more likely than manual workers to have all comorbidity groups. Sex differences were lost on  
18  
19 214 controlling for other factor for all comorbidities groups, except Group C (HTN and  
20  
21 215 overweight/obesity), for which females were 1.4 times as likely to experience both. Older  
22  
23 216 participants were significantly more likely to have group A comorbidity (DM and HTN) DM  
24  
25  
26  
27  
28  
29 217 and Group D (all comorbidities) (Table 4).  
30  
31  
32  
33  
34  
35  
36  
37  
38  
39  
40  
41  
42  
43  
44  
45  
46  
47  
48  
49  
50  
51  
52  
53  
54  
55  
56  
57

218 **Table-4: Modified stepwise Poisson regression models showing prevalence ratios (PR) and 95% confidence intervals for**  
 219 **comorbidities by demographic characteristics among Bangladeshi adults.**

220

| <b>Model</b>                                                                           | <b>Group-A<br/>(Diabetes and<br/>hypertension )</b> | <b>Group-B<br/>(Diabetes and<br/>overweight/obesity)</b> | <b>Group-C<br/>(Hypertension and<br/>overweight/obesity)</b> | <b>Group-D<br/>(Diabetes, hypertension<br/>and overweight/obesity)</b> |
|----------------------------------------------------------------------------------------|-----------------------------------------------------|----------------------------------------------------------|--------------------------------------------------------------|------------------------------------------------------------------------|
| <b>Model-1 (Wealth index )</b>                                                         |                                                     |                                                          |                                                              |                                                                        |
| <i>Wealth index</i>                                                                    |                                                     |                                                          |                                                              |                                                                        |
| Richest                                                                                | 3.94 (2.42-6.41)**                                  | 9.69 (4.84-19.4) **                                      | 6.83 (4.66-10) **                                            | 8.67 (3.65-20.56) **                                                   |
| Richer                                                                                 | 1.52 (0.88-2.61)                                    | 3.39 (1.61-7.16) **                                      | 3.78 (2.53-5.64) **                                          | 2.44 (0.95-6.31)                                                       |
| Middle                                                                                 | 0.9 (0.47-1.71)                                     | 1.63 (0.69-3.81)                                         | 1.3 (0.81-2.07)                                              | 1.17 (0.37-3.7)                                                        |
| Poorer                                                                                 | 0.9 (0.47-1.73)                                     | 0.81 (0.31-2.16)                                         | 1.13 (0.7-1.84)                                              | 0.79 (0.24-2.64)                                                       |
| Poorest                                                                                | Ref                                                 | Ref                                                      | Ref                                                          | Ref                                                                    |
| <b>Model-6 ( Wealth index + sex+ age + education+ occupation+ place of residence )</b> |                                                     |                                                          |                                                              |                                                                        |
| <i>Wealth index</i>                                                                    |                                                     |                                                          |                                                              |                                                                        |
| Richest                                                                                | 2.32 (1.32-4.1) **                                  | 4.84 (2.26-10.4) **                                      | 4.85 (3.25-7.24) **                                          | 3.99 (1.58-10.11) **                                                   |

|                         |                     |                  |                     |                     |
|-------------------------|---------------------|------------------|---------------------|---------------------|
| Richer                  | 1.12 (0.66-1.91)    | 2.22 (1.02-4.8)  | 3.03 (2.04-4.49)    | 1.59 (0.65-3.92)    |
| Middle                  | 0.74 (0.39-1.38)    | 1.23 (0.54-2.82) | 1.1 (0.69-1.75)     | 0.9 (0.31-2.64)     |
| Poorer                  | 0.78 (0.41-1.48)    | 0.71 (0.27-1.88) | 1.06 (0.65-1.7)     | 0.7 (0.22-2.24)     |
| Poorest                 | Ref                 | Ref              | Ref                 | Ref                 |
| <b>Sex</b>              |                     |                  |                     |                     |
| Female                  | 0.67 (0.35-1.31)    | 0.91 (0.47-1.78) | 1.44 (1.06-1.96) ** | 1.05 (0.46-2.36)    |
| Male                    | Ref                 | Ref              | Ref                 | Ref                 |
| <b>Age</b>              |                     |                  |                     |                     |
| Older                   | 2.17 (1.58-2.99) ** | 0.87 (0.62-1.21) | 1.11 (0.91-1.35)    | 1.61 (1.05-2.49) ** |
| Younger                 | Ref                 | Ref              | Ref                 | Ref                 |
| <b>Education</b>        |                     |                  |                     |                     |
| College or higher       | 1.38 (0.85-2.25)    | 1.53 (0.93-2.5)  | 1.09 (0.82-1.45)    | 1.4 (0.74-2.63)     |
| Secondary               | 1.06 (0.68-1.65)    | 1.33 (0.8-2.19)  | 0.91 (0.68-1.2)     | 1.24 (0.65-2.38)    |
| Primary                 | 1.03 (0.69-1.53)    | 1.42 (0.89-2.26) | 1.18 (0.93-1.5)     | 1.25 (0.69-2.28)    |
| No education, preschool | Ref                 | Ref              | Ref                 | Ref                 |
| <b>Occupational</b>     |                     |                  |                     |                     |

|                           |                     |                    |                     |                     |
|---------------------------|---------------------|--------------------|---------------------|---------------------|
| Non-manual                | 3.27 (1.94-5.52) ** | 4.22 (2.26-7.9) ** | 3.04 (2.19-4.22) ** | 3.69 (1.63-8.36) ** |
| Manual                    | Ref                 | Ref                | Ref                 | Ref                 |
| <i>Place of residence</i> |                     |                    |                     |                     |
| Urban                     | 1.33 (0.9-1.95)     | 1.17 (0.8-1.72)    | 1.04 (0.85-1.27)    | 1.72 (0.99-3.01)    |
| Rural                     | Ref                 | Ref                | Ref                 | Ref                 |

221

222 \*\* Statistical significance at p<0.05

For peer review only



## 223 DISCUSSION

224  
225 This is the first study in Bangladesh that investigated individual and comorbid  
226 conditions using a nationally representative sample. We found that within the Bangladesh adult  
227 population, aged more than 35 years, the prevalence of diabetes was 12%, hypertension 27%  
228 and overweight/obesity 22%. Diabetes, hypertension and overweight/obesity were comparatively  
229 higher in males than females. More than 14% of the sample also had more than one condition,  
230 with 1.3% exhibiting all three. We also found that individual prevalence and comorbidity were  
231 higher in those of a higher socioeconomic status. Once controlling for several confounders, those  
232 in the richest quintile of wealth index were significantly more likely than those in the poorest  
233 quintile to exhibit comorbidities.

234 These findings demonstrate an alarming burden of NCDs within Bangladesh, with the  
235 rapid growth of overweight in the country becoming a particular public health concern.<sup>27-29</sup> As  
236 with many other developing countries, Bangladesh is experiencing a nutritional transition and  
237 increases in gross domestic product (GDP), which have been associated with multiple shifts in  
238 food intake and reduced physical activity.<sup>30</sup>

239 Although, to the authors knowledge, this is the first study on the prevalence of NCD  
240 risk factor comorbidity in Bangladesh using a nationally representative sample, a previous study  
241 had found an association between anthropometric indices such as body mass index (BMI), waist  
242 circumference (WC), waist hip ratio (WHR) and cardio metabolic risk indicators (FBG, SBP and  
243 DBP).<sup>31</sup> A further study in four geographical regions, including Bangladesh, reported that every  
244 standard deviation higher of BMI was associated with 1.65 and 1.60 times higher probability of

1  
2  
3 245 diabetes and 1.42 and 1.28 times higher probability of hypertension, for men and women,  
4  
5 246 respectively.<sup>32</sup> Other studies have also found that HTN is a common comorbid condition in DM,  
6  
7 247 and vice versa,<sup>33</sup> whilst there is considerable evidence for an increased prevalence of HTN in  
8  
9 248 diabetic persons from other populations.<sup>34,35</sup>

10  
11  
12  
13 249 In the current study, overweight and diabetes risk was greater among young  
14  
15 250 people which is consistent with a similar study conducted in Indonesia.<sup>36</sup> Diabetes, hypertension  
16  
17 251 and overweight/obesity were more prevalent in non-manual labor compared to manual labor,  
18  
19 252 which was similar to findings from a study in Barbados.<sup>37</sup> However, the present study found  
20  
21 253 males were more likely to suffer comorbidities than females, contradicting findings from  
22  
23 254 previous studies.<sup>38,39</sup> We also found that the prevalence of individual conditions (diabetes,  
24  
25 255 hypertension and overweight/obesity) along with the comorbidity of them, was higher in urban  
26  
27 256 areas compared to rural, which is consistent with a number of studies conducted in developing  
28  
29 257 countries, including Bangladesh.<sup>33,40-44</sup>

30  
31  
32  
33  
34 258 Within our study we found a higher prevalence of individual conditions and  
35  
36 259 comorbidities in higher socioeconomic groups. These findings conflict with trends reported by  
37  
38 260 previous studies conducted in higher-income countries.<sup>45, 46</sup> However, another multi-country  
39  
40 261 study reported that comorbidity was more prevalent among the poor and less educated in low  
41  
42 262 income countries.<sup>47</sup> However, these findings were based on self-reported diagnosis, which may  
43  
44 263 introduce concerns of report and recall bias. Previous research in INDEPTH Asian sites has  
45  
46 264 reported inverse associations between comorbidity and markers of socioeconomic status.<sup>48</sup>

47  
48  
49  
50  
51 265 The main implications of the present study are the increased burden of NCDs within  
52  
53 266 Bangladesh, along with other LMICs, and the patterning of more than one risk factor within

1  
2  
3 267 individuals in the population. In contrast to findings from high income countries, prevalence of  
4  
5 268 individual risk factors and comorbidities was higher in higher SES groups. This points to  
6  
7 269 differences between countries in the population level determinants of NCDs and highlights that  
8  
9  
10 270 context specific interventions must be developed to counter them. As a first step, it is important  
11  
12 271 that countries collect and analyse high quality health data to allow them to develop and target  
13  
14  
15 272 interventions.  
16  
17

18 273

## 21 274 **STRENGTHS AND LIMITATIONS**

24 275 The main strengths of the study were the large nationally representative sample and the  
25  
26 276 collection of blood pressure, blood glucose concentration, body weight, and height  
27  
28 277 measurements by health technicians follow standard methods, including biomarker analysis,  
29  
30  
31 278 along with validated measures of socio-economic status. The main weakness of the study is the  
32  
33 279 cross-sectional nature, meaning that only associations can be inferred and causality cannot be  
34  
35  
36 280 determined. In addition although clinical measures of diabetes, hypertension and  
37  
38 281 overweight/obesity were taken, no measurements of blood lipids were taken in the survey,  
39  
40 282 meaning that metabolic syndrome could not be investigated. Waist and hip circumference were  
41  
42 283 also not collected, limiting the analysis that could be performed. Finally although the study was  
43  
44  
45 284 reported to be representative, only participants 35 years or older had measured anthropometry  
46  
47 285 and biomarkers meaning that the findings reflect this population of adults in the country.  
48  
49

50 286

## 53 287 **CONCLUSION**

1  
2  
3 288 In contrast to more affluent countries, individuals of higher socio-economic status in  
4  
5 289 Bangladesh are more likely to exhibit NCD risk factors and comorbidities than individuals from  
6  
7  
8 290 with lower SES status. It is important that we identify the patterning of these conditions within  
9  
10 291 countries if we are to develop effective public health approaches contextualized to the  
11  
12 292 population. This can be done through improved monitoring and surveillance of NCDs, linked to  
13  
14 293 primary care programmes. Such approaches also need policy and system changes, supported by  
15  
16 294 “political will”, societal and community support.  
17  
18  
19 295

## 22 296 **Contributors**

23  
24  
25 297 TB, NT, SKD & AAM conceptualized the study. TB, NT, SKD, RDG & AAM designed the  
26  
27 298 study and acquired the data. TB, SI & MRI conducted the data analysis. TB, NT, SI, MRI, SKD  
28  
29 299 & AAM interpreted the data. TB, NT & RDG prepared the first draft. TB, NT, SKD & AAM  
30  
31 300 participated in critical revision of the manuscript and contributed to its intellectual improvement.  
32  
33 301 All authors went through the final draft and approved it for submission.  
34  
35  
36  
37  
38 302

## 41 303 **Funding**

42  
43  
44 304 None.  
45  
46  
47 305

## 50 306 **Acknowledgments**

1  
2  
3 307 The authors thank MEASURE DHS for permission to use data from the 2011  
4  
5 308 Bangladesh DHS. The authors are also grateful to Mr. Mehedi Hasan, PhD student, University of  
6  
7  
8 309 Queensland, Australia.  
9

10  
11 310 **Competing Interests**  
12

13  
14 311 None declared.  
15

16  
17 312  
18

19  
20 313 **Patient consent**  
21

22  
23 314 None Declared  
24

25  
26 315  
27

28  
29 316 **Disclaimer**  
30

31 317 The authors are alone responsible for the integrity and accuracy of data analysis and the writing  
32  
33 318 the manuscript.  
34

35  
36 319  
37

38  
39 320 **Ethics approval**  
40

41  
42 321 The datasets were obtained from DHS Programme with proper procedure. The study exempt  
43  
44 322 from collecting ethical approval because the survey protocols were reviewed and approved by  
45  
46 323 ICF Macro Institutional Review Board, Maryland, USA and National Research Ethics  
47  
48 324 Committee of Bangladesh Medical Research Council (BMRC), Dhaka, Bangladesh.  
49

50  
51  
52  
53 325  
54  
55  
56  
57

1  
2  
3 326 **Data sharing statement**  
4  
5

6 327 The dataset of BDHS 2011 is available at the Demographic and Health Surveys Program. Extra  
7  
8  
9 328 data is available which is available on request at [http://dhsprogram-com/what-we-](http://dhsprogram-com/what-we-do/survey/survey-display-349.cfm)  
10  
11 329 [do/survey/survey-display-349.cfm](http://dhsprogram-com/what-we-do/survey/survey-display-349.cfm).  
12  
13

14 330  
15

16  
17 331  
18  
19  
20  
21  
22  
23  
24  
25  
26  
27  
28  
29  
30  
31  
32  
33  
34  
35  
36  
37  
38  
39  
40  
41  
42  
43  
44  
45  
46  
47  
48  
49  
50  
51  
52  
53  
54  
55  
56  
57

**References:**

1. Murray CJ, Vos T, Lozano R, et al. Disability-adjusted life years (DALYs) for 291 diseases and injuries in 21 regions, 1990–2010: a systematic analysis for the Global Burden of Disease Study 2010. *Lancet*. 2013;380(9859):2197-223. doi: 10.1016/S0140-6736(12)61689-4.
2. Lozano R, Naghavi M, Foreman K, et al. Global and regional mortality from 235 causes of death for 20 age groups in 1990 and 2010: a systematic analysis for the Global Burden of Disease Study 2010. *Lancet*. 2013;380(9859):2095-128. doi: 10.1016/S0140-6736(12)61728-0
3. Bennett D, Bisanzio D, Deribew A, et al. Global, regional, and national under-5 mortality, adult mortality, age-specific mortality, and life expectancy, 1970–2016: a systematic analysis for the Global Burden of Disease Study 2016. *Lancet*. 2017;390(10100):1084-1150. doi: 10.1016/s0140-6736(17)31833-0.
4. World Health Organization. Global status report on noncommunicable diseases 2010. Geneva: World Health Organization; 2011. 161 p.
5. Abegunde DO, Mathers CD, Adam T, et al. The burden and costs of chronic diseases in low-income and middle-income countries. *Lancet*. 2007;370(9603):1929-38. doi: 10.1016/S0140-6736(07)61696-1
6. Lee JT, Hamid F, Pati S, et al. Impact of noncommunicable disease multimorbidity on healthcare utilisation and out-of-pocket expenditures in middle-income countries: cross sectional analysis. *PLoS One*. 2015;10(7):e0127199. doi: 10.1371/journal.pone.0127199.
7. World Health Organization. Global status report on noncommunicable diseases 2014. Geneva: World Health Organization; 2015. 280 p.
8. Streatfield PK, Karar ZA. Population challenges for Bangladesh in the coming decades. *J Health Popul Nutr*. 2008;26(3):261.

- 1  
2  
3 355 9. National Institute of Population Research and Training (NIPORT), Mitra and Associates,  
4  
5 356 ICF International. Bangladesh Urban Health Survey 2013.. Dhaka, Bangladesh, Calverton,  
6  
7 357 Maryland, USA: NIPORT, Mitra and Associates, and ICF International., 2015.  
8  
9  
10 358 10. Ahsan KZ, Alam MN, Streatfield PK, et al. Has Bangladesh Entered the Fourth Stage of  
11  
12 359 the Epidemiologic Transition?. Proceedings of the International seminar on Mortality: Past,  
13  
14 360 Present and Future; 2017Aug 7-8; the University of Campinas, Brazil.  
15  
16  
17 361 11. Zaman MM, Bhuiyan MR, Karim MN, et al. Clustering of non-communicable diseases  
18  
19 362 risk factors in Bangladeshi adults: an analysis of STEPS survey 2013. *BMC Public Health*.  
20  
21 363 2015;15(1):659. doi: 10.1186/s12889-015-1938-4.  
22  
23  
24 364 12. Hillas G, Perlikos F, Tsiligianni I, et al. Managing comorbidities in COPD. *Int J Chron*  
25  
26 365 *Obstruct Pulmon Dis*.2015;10:95. doi: 10.2147/COPD.S54473.  
27  
28  
29 366 13. Roberts KC, Rao DP, Bennett TL, et al. Prevalence and patterns of chronic disease  
30  
31 367 multimorbidity and associated determinants in Canada. *Health Promot Chronic Dis Prev*  
32  
33 368 *Can*. 2015 ;35(6):87-94.  
34  
35  
36 369 14. Wang J, Ma JJ, Liu J, et al. Prevalence and Risk Factors of Comorbidities among  
37  
38 370 Hypertensive Patients in China. *Int J Med Sci*. 2017;14(3):201. doi: 10.7150/ijms.16974.  
39  
40 371 15. Hurst C, Thinkhamrop B. The association between hypertension comorbidity and  
41  
42 372 microvascular complications in type 2 diabetes patients: A nationwide cross-sectional study in  
43  
44 373 Thailand. *Diabetes Metab J*. 2015;39(5):395-404. doi: 10.4093/dmj.2015.39.5.395  
45  
46  
47 374 19. Allen L, Williams J, Townsend N, et al. Socioeconomic status and non-communicable  
48  
49 375 disease behavioural risk factors in low-income and lower-middle-income countries: a systematic  
50  
51 376 review. *Lancet Glob Health*. 2017;5(3):e277-e89. doi: 10.1016/S2214-109X(17)30058-X.  
52  
53  
54  
55  
56  
57



- 1  
2  
3 377 20. Varghese C. Reducing premature mortality from non-communicable diseases, including  
4  
5 378 for people with severe mental disorders. *World Psychiatry*. 2017;16(1):45-7. doi:  
6  
7 379 10.1002/wps.20376.  
8  
9  
10 380 21. National Institute of Population Research and Training (NIPORT), Mitra and Associates,  
11  
12 381 ICF International. Bangladesh Demographic and Health Survey 2011, Preliminary Report.  
13  
14 382 Dhaka, Bangladesh, Calverton, Maryland, USA: NIPORT, Mitra and Associates, and ICF  
15  
16 383 International., 2012.  
17  
18  
19 384 22. Biswas T, Islam MS, Linton N, et al. Socio-economic inequality of chronic non-  
20  
21 385 communicable diseases in Bangladesh. *PloS One*. 2016;11(11):e0167140. doi:  
22  
23 386 10.1371/journal.pone.0167140.  
24  
25  
26 387 23. Akter S, Rahman MM, Abe SK, et al. Prevalence of diabetes and prediabetes and their  
27  
28 388 risk factors among Bangladeshi adults: a nationwide survey. *Bull World Health Organ*.  
29  
30 389 2014;92(3):204-13A. doi: 10.2471/BLT.13.128371.  
31  
32  
33 390 24. Ke-You G, Da-Wei F. The magnitude and trends of under-and over-nutrition in Asian  
34  
35 391 countries. *Biomed Environ Sci*. 2001;14(1-2):53-60.  
36  
37  
38 392 25. National Institute of Population Research and Training (NIPORT), Mitra and Associates,  
39  
40 393 ICF International. Bangladesh Demographic and Health Survey 2011. Dhaka, Bangladesh,  
41  
42 394 Calverton, Maryland, USA: NIPORT, Mitra and Associates, and ICF International., 2013.  
43  
44  
45 395 26. Rahman M, Williams G, Al Mamun A. Hypertension and diabetes prevalence among  
46  
47 396 adults with moderately increased BMI (23· 0–24· 9 kg/m<sup>2</sup>): findings from a nationwide survey  
48  
49 397 in Bangladesh. *Public Health Nutr*. 2017:1-8. doi: 10.1017/S1368980016003566.  
50  
51  
52  
53  
54  
55  
56  
57

- 1  
2  
3 398 27. Biswas T, Uddin MJ, Al Mamun A, et al. Increasing prevalence of overweight and  
4  
5 399 obesity in Bangladeshi women of reproductive age: Findings from 2004 to 2014. *PloS One*.  
6  
7 400 2017;12(7):e0181080. doi: 10.1371/journal.pone.0181080.  
8  
9  
10 401 28. Hoque ME, Hasan MT, Rahman M, et al. Double burden of underweight and overweight  
11  
12 402 among Bangladeshi adults differs between men and women: evidence from a nationally  
13  
14 403 representative survey. *Public Health Nutr.*2017;20(12):2183-91. doi:  
15  
16 404 10.1017/S1368980017000957.  
17  
18  
19 405 29. Biswas T, Garnett SP, Pervin S, et al. The prevalence of underweight, overweight and  
20  
21 406 obesity in Bangladeshi adults: Data from a national survey. *PloS One*. 2017;12(5):e0177395. doi:  
22  
23 407 10.1371/journal.pone.0177395.  
24  
25  
26 408 30. Dietz WH. Double-duty solutions for the double burden of malnutrition. *Lancet*. 2017.  
27  
28 409 doi: 10.1016/S0140-6736(17)32479-0.  
29  
30  
31 410 31. Bhowmik B, Afsana F, Ahmed T, et al. Obesity and associated type 2 diabetes and  
32  
33 411 hypertension in factory workers of Bangladesh. *BMC Res Notes*.2015;8(1):460. doi:  
34  
35 412 10.1186/s13104-015-1377-4.  
36  
37  
38 413 32. Pradeepa R. The rising burden of diabetes and hypertension in southeast asian and african  
39  
40 414 regions: need for effective strategies for prevention and control in primary health care settings.  
41  
42 415 *Int J Hypertens*. 2013;2013. doi: 10.1155/2013/409083.  
43  
44  
45 416 33. Sola A, Chinyere O, Stephen A, et al. Hypertension prevalence in an urban and rural area of  
46  
47 417 Nigeria. *J Med Sci*. 2013;4:149-54.  
48  
49 418 34. Berraho M, El Achhab Y, Benslimane A, et al. Hypertension and type 2 diabetes: a cross-  
50  
51 419 sectional study in Morocco (EPIDIAM Study). *Pan Afr Med J*. 2012;11(1).  
52  
53  
54  
55  
56  
57

- 1  
2  
3 420 35. Hashemizadeh H, Sarvelayati D. Hypertension and Type 2 Diabetes: A Cross-sectional  
4  
5 421 Study in Hospitalized Patients in Quchan, Iran. *Iran J Diabetes Obesity*. 2013;5(1):21-6.  
6  
7 422 36. Hussain MA, Huxley RR, Al Mamun A. Multimorbidity prevalence and pattern in  
8  
9 423 Indonesian adults: an exploratory study using national survey data. *BMJ Open*.  
10  
11 424 2015;5(12):e009810. doi: 10.1136/bmjopen-2015-009810.  
12  
13  
14 425 37. Howitt C, Hambleton IR, Rose AM, et al. Social distribution of diabetes, hypertension  
15  
16 426 and related risk factors in Barbados: a cross-sectional study. *BMJ Open*. 2015;5(12):e008869.  
17  
18 427 doi: 10.1136/bmjopen-2015-008869.  
19  
20  
21 428 38. Pearson TA. Education and income: double-edged swords in the epidemiologic transition  
22  
23 429 of cardiovascular disease. *Ethn Dis*. 2003;13(2; SUPP/2):S2-158.  
24  
25  
26 430 39. Agborsangaya CB, Lau D, Lahtinen M, et al. Multimorbidity prevalence and patterns  
27  
28 431 across socioeconomic determinants: a cross-sectional survey. *BMC Public Health*.  
29  
30 432 2012;12(1):201. doi: 10.1186/1471-2458-12-201.  
31  
32  
33 433 40. Rahman M, Williams G, Al Mamun A. Gender differences in hypertension awareness,  
34  
35 434 antihypertensive use and blood pressure control in Bangladeshi adults: findings from a national  
36  
37 435 cross-sectional survey. *J Health Popul Nutr*. 2017;36(1):23. doi: 10.1186/s41043-017-0101-5.  
38  
39  
40 436 41. Li G, Hu H, Dong Z, et al. Urban and suburban differences in hypertension trends and  
41  
42 437 self-care: Three population-based cross-sectional studies from 2005-2011. *PloS One*.  
43  
44 438 2015;10(2):e0117999. doi: 10.1371/journal.pone.0117999.  
45  
46  
47 439 42. Dhungana RR, Pandey AR, Bista B, et al. Prevalence and associated factors of  
48  
49 440 hypertension: a community-based cross-sectional study in municipalities of Kathmandu, Nepal.  
50  
51 441 *Int J Hypertens*. 2016;2016. doi: 10.1155/2016/1656938.  
52  
53  
54  
55  
56  
57

- 1  
2  
3 442 43. Chowdhury MAB, Uddin MJ, Haque MR, et al. Hypertension among adults in  
4  
5 443 Bangladesh: evidence from a national cross-sectional survey. *BMC Cardiovasc Disord.*  
6  
7 444 2016;16(1):22. doi: 10.1186/s12872-016-0197-3.  
8  
9  
10 445 44. Akter S, Rahman MM, Abe SK, et al. Prevalence of diabetes and prediabetes and their  
11  
12 446 risk factors among Bangladeshi adults: a nationwide survey. *Bull World Health*  
13  
14 447 *Organ.*2014;92(3):204-13A. doi: 10.2471/BLT.13.128371  
15  
16  
17 448 45. Connolly V, Unwin N, Sherriff P, et al. Diabetes prevalence and socioeconomic status: a  
18  
19 449 population based study showing increased prevalence of type 2 diabetes mellitus in deprived  
20  
21 450 areas. *J Epidemiol Community Health.*2000;54(3):173-7.  
22  
23  
24 451 46. Glover JD, Hetzel DM, Tennant SK. The socioeconomic gradient and chronic illness and  
25  
26 452 associated risk factors in Australia. *Aust New Zealand Health Policy.* 2004;1(1):8. doi:  
27  
28 453 10.1186/1743-8462-1-8.  
29  
30  
31 454 47. Hosseinpoor AR, Bergen N, Mendis S, et al. Socioeconomic inequality in the prevalence  
32  
33 455 of noncommunicable diseases in low-and middle-income countries: results from the World  
34  
35 456 Health Survey. *BMC Public Health.* 2012;12(1):474. doi: 10.1186/s12889-015-2227-y.  
36  
37  
38 457 48. Van Minh H, Ng N, Juvekar S, et al. Self-reported prevalence of chronic diseases and  
39  
40 458 their relation to selected sociodemographic variables: a study in INDEPTH Asian sites, 2005.  
41  
42 459 *Prev Chronic Dis.*2008;5(3).  
43  
44  
45  
46  
47  
48  
49  
50  
51  
52  
53  
54  
55  
56  
57

1  
2  
3 **460 Figures:**  
4

5  
6 **461 Fig 1.** Scatter plot between age with blood glucose, systolic blood pressure, diastolic blood  
7  
8 **462** pressure and BMI.  
9

10 **463 Fig 2.** Prevalence of diabetes, hypertension, overweight and comorbidity by sex among  
11  
12  
13 **464 Bangladeshi adults**  
14

15  
16 **465**  
17  
18

19 **466 Supplementary Materials:**  
20

21  
22 **467 Supplementary File 1:** STROBE Checklist  
23

24  
25 **468 Supplementary File 2:** Modified stepwise Poisson regression models showing prevalence ratios  
26  
27 **469** (PR) and 95% confidence intervals for comorbidities by demographic characteristics among  
28  
29 **470** Bangladeshi adults.  
30  
31  
32  
33  
34  
35  
36  
37  
38  
39  
40  
41  
42  
43  
44  
45  
46  
47  
48  
49  
50  
51  
52  
53  
54  
55  
56  
57

1  
2  
3  
4  
5  
6  
7  
8  
9  
10  
11  
12  
13  
14  
15  
16  
17  
18  
19  
20  
21  
22  
23  
24  
25  
26  
27  
28  
29  
30  
31  
32  
33  
34  
35  
36  
37  
38  
39  
40  
41  
42  
43  
44  
45  
46  
47  
48  
49  
50  
51  
52  
53  
54  
55  
56  
57  
58  
59  
60



51x67mm (300 x 300 DPI)



127x62mm (300 x 300 DPI)

**STROBE 2007 (v4) Statement—Checklist of items that should be included in reports of *cross-sectional studies***

***Title of the study:* Association between high socioeconomic status with greater prevalence of non-communicable diseases risk factors and comorbidities in Bangladesh: Findings from a nationwide cross-sectional survey**

| Section/Topic             | Item # | Recommendation                                                                                                                                                                       | Reported on page # |
|---------------------------|--------|--------------------------------------------------------------------------------------------------------------------------------------------------------------------------------------|--------------------|
| Title and abstract        | 1      | (a) Indicate the study’s design with a commonly used term in the title or the abstract                                                                                               | 1                  |
|                           |        | (b) Provide in the abstract an informative and balanced summary of what was done and what was found                                                                                  | 3-4                |
| <b>Introduction</b>       |        |                                                                                                                                                                                      |                    |
| Background/rationale      | 2      | Explain the scientific background and rationale for the investigation being reported                                                                                                 | 6-7                |
| Objectives                | 3      | State specific objectives, including any prespecified hypotheses                                                                                                                     | 7                  |
| <b>Methods</b>            |        |                                                                                                                                                                                      |                    |
| Study design              | 4      | Present key elements of study design early in the paper                                                                                                                              | 7-8                |
| Setting                   | 5      | Describe the setting, locations, and relevant dates, including periods of recruitment, exposure, follow-up, and data collection                                                      | 7-8                |
| Participants              | 6      | (a) Give the eligibility criteria, and the sources and methods of selection of participants                                                                                          | 7-8                |
| Variables                 | 7      | Clearly define all outcomes, exposures, predictors, potential confounders, and effect modifiers. Give diagnostic criteria, if applicable                                             | 8-9                |
| Data sources/ measurement | 8*     | For each variable of interest, give sources of data and details of methods of assessment (measurement). Describe comparability of assessment methods if there is more than one group | 8-9                |
| Bias                      | 9      | Describe any efforts to address potential sources of bias                                                                                                                            | 9                  |
| Study size                | 10     | Explain how the study size was arrived at                                                                                                                                            | 9                  |
| Quantitative variables    | 11     | Explain how quantitative variables were handled in the analyses. If applicable, describe which groupings were chosen and why                                                         | 9                  |
| Statistical methods       | 12     | (a) Describe all statistical methods, including those used to control for confounding                                                                                                | 9                  |
|                           |        | (b) Describe any methods used to examine subgroups and interactions                                                                                                                  | Not applicable     |



|                          |     |                                                                                                                                                                                                              |                |
|--------------------------|-----|--------------------------------------------------------------------------------------------------------------------------------------------------------------------------------------------------------------|----------------|
|                          |     | (c) Explain how missing data were addressed                                                                                                                                                                  | Not applicable |
|                          |     | (d) If applicable, describe analytical methods taking account of sampling strategy                                                                                                                           | Not applicable |
|                          |     | (e) Describe any sensitivity analyses                                                                                                                                                                        | Not applicable |
| <b>Results</b>           |     |                                                                                                                                                                                                              |                |
| Participants             | 13* | (a) Report numbers of individuals at each stage of study—eg numbers potentially eligible, examined for eligibility, confirmed eligible, included in the study, completing follow-up, and analysed            | 10-12          |
|                          |     | (b) Give reasons for non-participation at each stage                                                                                                                                                         | Not applicable |
|                          |     | (c) Consider use of a flow diagram                                                                                                                                                                           | Not applicable |
| Descriptive data         | 14* | (a) Give characteristics of study participants (eg demographic, clinical, social) and information on exposures and potential confounders                                                                     | 10-12          |
|                          |     | (b) Indicate number of participants with missing data for each variable of interest                                                                                                                          | Not applicable |
| Outcome data             | 15* | Report numbers of outcome events or summary measures                                                                                                                                                         | 11-22          |
| Main results             | 16  | (a) Give unadjusted estimates and, if applicable, confounder-adjusted estimates and their precision (eg, 95% confidence interval). Make clear which confounders were adjusted for and why they were included | 11-22          |
|                          |     | (b) Report category boundaries when continuous variables were categorized                                                                                                                                    | Not applicable |
|                          |     | (c) If relevant, consider translating estimates of relative risk into absolute risk for a meaningful time period                                                                                             | Not applicable |
| Other analyses           | 17  | Report other analyses done—eg analyses of subgroups and interactions, and sensitivity analyses                                                                                                               | Not applicable |
| <b>Discussion</b>        |     |                                                                                                                                                                                                              |                |
| Key results              | 18  | Summarise key results with reference to study objectives                                                                                                                                                     | 23             |
| Limitations              | 19  | Discuss limitations of the study, taking into account sources of potential bias or imprecision. Discuss both direction and magnitude of any potential bias                                                   | 25-26          |
| Interpretation           | 20  | Give a cautious overall interpretation of results considering objectives, limitations, multiplicity of analyses, results from similar studies, and other relevant evidence                                   | 23-25          |
| Generalisability         | 21  | Discuss the generalisability (external validity) of the study results                                                                                                                                        | 23-25          |
| <b>Other information</b> |     |                                                                                                                                                                                                              |                |
| Funding                  | 22  | Give the source of funding and the role of the funders for the present study and, if applicable, for the original study on which the present article is based                                                | 26             |

\*Give information separately for cases and controls in case-control studies and, if applicable, for exposed and unexposed groups in cohort and cross-sectional studies.

1  
2  
3  
4  
5  
6  
7  
8  
9  
10  
11  
12  
13  
14  
15  
16  
17  
18  
19  
20  
21  
22  
23  
24  
25  
26  
27  
28  
29  
30  
31  
32  
33  
34  
35  
36  
37  
38  
39  
40  
41  
42  
43  
44  
45  
46

**Note:** An Explanation and Elaboration article discusses each checklist item and gives methodological background and published examples of transparent reporting. The STROBE checklist is best used in conjunction with this article (freely available on the Web sites of PLoS Medicine at <http://www.plosmedicine.org/>, Annals of Internal Medicine at <http://www.annals.org/>, and Epidemiology at <http://www.epidem.com/>). Information on the STROBE Initiative is available at [www.strobe-statement.org](http://www.strobe-statement.org).

For peer review only

**Table: Modified stepwise Poisson regression models showing prevalence ratios (PR) and 95% confidence intervals for co-morbidities by demographic characteristics among Bangladeshi adults.**

|                                                       | <b>Group-A<br/>(Diabetes and hypertension )</b> | <b>Group-B<br/>(Diabetes and overweight/obesity)</b> | <b>Group-C<br/>(Hypertension and overweight/obesity)</b> | <b>Group-D<br/>(Diabetes, hypertension and overweight/obesity)</b> |
|-------------------------------------------------------|-------------------------------------------------|------------------------------------------------------|----------------------------------------------------------|--------------------------------------------------------------------|
| <b>Model-1 (Wealth index )</b>                        |                                                 |                                                      |                                                          |                                                                    |
| <i>Wealth index</i>                                   |                                                 |                                                      |                                                          |                                                                    |
| Richest                                               | 3.94 (2.42-6.41)**                              | 9.69 (4.84-19.4) **                                  | 6.83 (4.66-10) **                                        | 8.67 (3.65-20.56) **                                               |
| Richer                                                | 1.52 (0.88-2.61)                                | 3.39 (1.61-7.16) **                                  | 3.78 (2.53-5.64) **                                      | 2.44 (0.95-6.31)                                                   |
| Middle                                                | 0.9 (0.47-1.71)                                 | 1.63 (0.69-3.81)                                     | 1.3 (0.81-2.07)                                          | 1.17 (0.37-3.7)                                                    |
| Poorer                                                | 0.9 (0.47-1.73)                                 | 0.81 (0.31-2.16)                                     | 1.13 (0.7-1.84)                                          | 0.79 (0.24-2.64)                                                   |
| Poorest                                               | Ref                                             | Ref                                                  | Ref                                                      | Ref                                                                |
| <b>Model-2 (Wealth index + sex)</b>                   |                                                 |                                                      |                                                          |                                                                    |
| <i>Wealth index</i>                                   |                                                 |                                                      |                                                          |                                                                    |
| Richest                                               | 3.93 (2.42-6.39) **                             | 9.68 (4.84-19.35) **                                 | 6.88 (4.7-10.08) **                                      | 8.69 (3.68-20.5) **                                                |
| Richer                                                | 1.51 (0.88-2.6)                                 | 3.39 (1.61-7.14) **                                  | 3.82 (2.56-5.69) **                                      | 2.45 (0.96-6.3)                                                    |
| Middle                                                | 0.9 (0.47-1.71)                                 | 1.62 (0.69-3.8)                                      | 1.31 (0.82-2.09)                                         | 1.17 (0.37-3.69)                                                   |
| Poorer                                                | 0.89 (0.47-1.71)                                | 0.81 (0.31-2.15)                                     | 1.16 (0.72-1.89)                                         | 0.8 (0.24-2.63)                                                    |
| Poorest                                               | Ref                                             | Ref                                                  | Ref                                                      | Ref                                                                |
| <i>Sex</i>                                            |                                                 |                                                      |                                                          |                                                                    |
| Female                                                | 0.85 (0.43-1.66)                                | 0.95 (0.49-1.85)                                     | 1.66 (1.22-2.26) **                                      | 1.21 (0.53-2.74)                                                   |
| Male                                                  | Ref                                             | Ref                                                  | Ref                                                      | Ref                                                                |
| <b>Model-3 (Wealth index + sex+ age )</b>             |                                                 |                                                      |                                                          |                                                                    |
| <i>Wealth index</i>                                   |                                                 |                                                      |                                                          |                                                                    |
| Richest                                               | 4.04 (2.49-6.56) **                             | 9.65 (4.82-19.3) **                                  | 6.92 (4.73-10.13) **                                     | 8.82 (3.74-20.82) **                                               |
| Richer                                                | 1.51 (0.88-2.59)                                | 3.4 (1.61-7.14) **                                   | 3.81 (2.55-5.67) **                                      | 2.44 (0.95-6.26)                                                   |
| Middle                                                | 0.88 (0.46-1.67)                                | 1.63 (0.7-3.81)                                      | 1.3 (0.81-2.07)                                          | 1.15 (0.37-3.65)                                                   |
| Poorer                                                | 0.86 (0.45-1.64)                                | 0.82 (0.31-2.15)                                     | 1.15 (0.71-1.87)                                         | 0.78 (0.24-2.57)                                                   |
| Poorest                                               | Ref                                             | Ref                                                  | Ref                                                      | Ref                                                                |
| <i>Sex</i>                                            |                                                 |                                                      |                                                          |                                                                    |
| Female                                                | 0.75 (0.39-1.46)                                | 0.97 (0.5-1.88)                                      | 1.61 (1.18-2.19) **                                      | 1.13 (0.5-2.54)                                                    |
| Male                                                  | Ref                                             | Ref                                                  | Ref                                                      | Ref                                                                |
| <i>Age</i>                                            |                                                 |                                                      |                                                          |                                                                    |
| Older                                                 | 2.34 (1.71-3.2) **                              | 0.88 (0.65-1.2)                                      | 1.23 (1.03-1.47) **                                      | 1.6 (1.05-2.42) **                                                 |
| Younger                                               | Ref                                             | Ref                                                  | Ref                                                      | Ref                                                                |
| <b>Model-4 (Wealth index + sex+ age + education )</b> |                                                 |                                                      |                                                          |                                                                    |

|                                                                    |                     |                      |                      |                      |
|--------------------------------------------------------------------|---------------------|----------------------|----------------------|----------------------|
| <b>Wealth index</b>                                                |                     |                      |                      |                      |
| Richest                                                            | 3.62 (2.16-6.07) ** | 7.84 (3.74-16.45) ** | 6.76 (4.55-10.03) ** | 7.56 (3.11-18.42) ** |
| Richer                                                             | 1.45 (0.84-2.51)    | 2.98 (1.37-6.5)      | 3.77 (2.53-5.63) **  | 2.24 (0.87-5.8)      |
| Middle                                                             | 0.87 (0.46-1.64)    | 1.5 (0.65-3.5)       | 1.28 (0.81-2.05)     | 1.1 (0.36-3.36)      |
| Poorer                                                             | 0.85 (0.45-1.63)    | 0.78 (0.29-2.09)     | 1.15 (0.71-1.86)     | 0.77 (0.23-2.51)     |
| Poorest                                                            | Ref                 | Ref                  | Ref                  | Ref                  |
| <b>Sex</b>                                                         |                     |                      |                      |                      |
| Female                                                             | 0.76 (0.39-1.49)    | 1.04 (0.53-2.05)     | 1.62 (1.18-2.22) **  | 1.19 (0.52-2.71)     |
| Male                                                               | Ref                 | Ref                  | Ref                  | Ref                  |
| <b>Age</b>                                                         |                     |                      |                      |                      |
| Older                                                              | 2.45 (1.79-3.36) ** | 0.97 (0.7-1.34)      | 1.25 (1.04-1.51) **  | 1.72 (1.11-2.65) **  |
| Younger                                                            | Ref                 | Ref                  | Ref                  | Ref                  |
| <b>Education</b>                                                   |                     |                      |                      |                      |
| College or higher                                                  | 1.54 (0.96-2.5)     | 1.73 (1.06-2.83) **  | 1.21 (0.91-1.61)     | 1.59 (0.85-2.97)     |
| Secondary                                                          | 0.97 (0.62-1.51)    | 1.22 (0.74-2.01)     | 0.84 (0.64-1.12)     | 1.12 (0.59-2.15)     |
| Primary                                                            | 0.96 (0.64-1.42)    | 1.35 (0.85-2.14)     | 1.13 (0.9-1.43)      | 1.17 (0.65-2.11)     |
| No education, preschool                                            | Ref                 | Ref                  | Ref                  | Ref                  |
| <b>Model-5 ( Wealth index + sex+ age + education+ occupation )</b> |                     |                      |                      |                      |
| <b>Wealth index</b>                                                |                     |                      |                      |                      |
| Richest                                                            | 2.72 (1.6-4.61) **  | 5.3 (2.54-11.05) **  | 4.97 (3.37-7.33) **  | 5.47 (2.32-12.91) ** |
| Richer                                                             | 1.18 (0.69-2.04)    | 2.29 (1.06-4.95) **  | 3.06 (2.06-4.53) **  | 1.79 (0.71-4.49)     |
| Middle                                                             | 0.75 (0.4-1.41)     | 1.24 (0.54-2.85)     | 1.11 (0.7-1.76)      | 0.93 (0.31-2.76)     |
| Poorer                                                             | 0.78 (0.41-1.49)    | 0.72 (0.27-1.88)     | 1.06 (0.65-1.7)      | 0.7 (0.22-2.26)      |
| Poorest                                                            | Ref                 | Ref                  | Ref                  | Ref                  |
| <b>Sex</b>                                                         |                     |                      |                      |                      |
| Female                                                             | 0.67 (0.35-1.31)    | 0.91 (0.47-1.78)     | 1.44 (1.06-1.96) **  | 1.05 (0.47-2.37)     |
| Male                                                               | Ref                 | Ref                  | Ref                  | Ref                  |
| <b>Age</b>                                                         |                     |                      |                      |                      |
| Older                                                              | 2.13 (1.54-2.94) ** | 0.86 (0.62-1.19)     | 1.11 (0.91-1.34)     | 1.54 (1.00-2.38) **  |
| Younger                                                            | Ref                 | Ref                  | Ref                  | Ref                  |
| <b>Education</b>                                                   |                     |                      |                      |                      |
| College or higher                                                  | 1.4 (0.86-2.28)     | 1.54 (0.94-2.51)     | 1.09 (0.82-1.45)     | 1.44 (0.77-2.71)     |
| Secondary                                                          | 1.05 (0.67-1.64)    | 1.32 (0.8-2.18)      | 0.9 (0.68-1.2)       | 1.22 (0.63-2.35)     |
| Primary                                                            | 1.03 (0.69-1.53)    | 1.41 (0.89-2.25)     | 1.18 (0.93-1.49)     | 1.24 (0.68-2.26)     |
| No education, preschool                                            | Ref                 | Ref                  | Ref                  | Ref                  |
| <b>Occupational</b>                                                |                     |                      |                      |                      |
| Non-manual                                                         | 3.32 (1.97-5.59) ** | 4.25 (2.27-7.97) **  | 3.04 (2.19-4.23) **  | 3.79 (1.67-8.61) **  |

|                                                                                        |                     |                     |                     |                      |
|----------------------------------------------------------------------------------------|---------------------|---------------------|---------------------|----------------------|
| Manual                                                                                 | Ref                 | Ref                 | Ref                 | Ref                  |
| <b>Model-5 ( Wealth index + sex+ age + education+ occupation+ place of residence )</b> |                     |                     |                     |                      |
| <b>Wealth index</b>                                                                    |                     |                     |                     |                      |
| Richest                                                                                | 2.32 (1.32-4.1) **  | 4.84 (2.26-10.4) ** | 4.85 (3.25-7.24) ** | 3.99 (1.58-10.11) ** |
| Richer                                                                                 | 1.12 (0.66-1.91)    | 2.22 (1.02-4.8)     | 3.03 (2.04-4.49)    | 1.59 (0.65-3.92)     |
| Middle                                                                                 | 0.74 (0.39-1.38)    | 1.23 (0.54-2.82)    | 1.1 (0.69-1.75)     | 0.9 (0.31-2.64)      |
| Poorer                                                                                 | 0.78 (0.41-1.48)    | 0.71 (0.27-1.88)    | 1.06 (0.65-1.7)     | 0.7 (0.22-2.24)      |
| Poorest                                                                                | Ref                 | Ref                 | Ref                 | Ref                  |
| <b>Sex</b>                                                                             |                     |                     |                     |                      |
| Female                                                                                 | 0.67 (0.35-1.31)    | 0.91 (0.47-1.78)    | 1.44 (1.06-1.96) ** | 1.05 (0.46-2.36)     |
| Male                                                                                   | Ref                 | Ref                 | Ref                 | Ref                  |
| <b>Age</b>                                                                             |                     |                     |                     |                      |
| Older                                                                                  | 2.17 (1.58-2.99) ** | 0.87 (0.62-1.21)    | 1.11 (0.91-1.35)    | 1.61 (1.05-2.49) **  |
| Younger                                                                                | Ref                 | Ref                 | Ref                 | Ref                  |
| <b>Education</b>                                                                       |                     |                     |                     |                      |
| College or higher                                                                      | 1.38 (0.85-2.25)    | 1.53 (0.93-2.5)     | 1.09 (0.82-1.45)    | 1.4 (0.74-2.63)      |
| Secondary                                                                              | 1.06 (0.68-1.65)    | 1.33 (0.8-2.19)     | 0.91 (0.68-1.2)     | 1.24 (0.65-2.38)     |
| Primary                                                                                | 1.03 (0.69-1.53)    | 1.42 (0.89-2.26)    | 1.18 (0.93-1.5)     | 1.25 (0.69-2.28)     |
| No education, preschool                                                                | Ref                 | Ref                 | Ref                 | Ref                  |
| <b>Occupational</b>                                                                    |                     |                     |                     |                      |
| Non-manual                                                                             | 3.27 (1.94-5.52) ** | 4.22 (2.26-7.9) **  | 3.04 (2.19-4.22) ** | 3.69 (1.63-8.36) **  |
| Manual                                                                                 | Ref                 | Ref                 | Ref                 | Ref                  |
| <b>Place of residence</b>                                                              |                     |                     |                     |                      |
| Urban                                                                                  | 1.33 (0.9-1.95)     | 1.17 (0.8-1.72)     | 1.04 (0.85-1.27)    | 1.72 (0.99-3.01)     |
| Rural                                                                                  | Ref                 | Ref                 | Ref                 | Ref                  |
