# Supplementary material for: Association between socioeconomic status and prevalence of non-communicable diseases risk factors and comorbidities in Bangladesh: findings from a nationwide cross-sectional survey
Source: PubMed Central journal article supplement — BMJ Open. 2019 Mar 13;9(3):e025538. doi: 10.1136/bmjopen-2018-025538 (PMC6429850; doi:10.1136/bmjopen-2018-025538), 2019-03-13
Supplement: bmjopen-2018-025538supp002.pdf [file bmjopen-2018-025538supp002.pdf]

**Table: Modified stepwise Poisson regression models showing prevalence ratios (PR) and 95% confidence intervals for co-morbidities by demographic characteristics among Bangladeshi adults.**

|                                                       | <b>Group-A<br/>(Diabetes and hypertension )</b> | <b>Group-B<br/>(Diabetes and overweight/obesity)</b> | <b>Group-C<br/>(Hypertension and overweight/obesity)</b> | <b>Group-D<br/>(Diabetes, hypertension and overweight/obesity)</b> |
|-------------------------------------------------------|-------------------------------------------------|------------------------------------------------------|----------------------------------------------------------|--------------------------------------------------------------------|
| <b>Model-1 (Wealth index )</b>                        |                                                 |                                                      |                                                          |                                                                    |
| <i>Wealth index</i>                                   |                                                 |                                                      |                                                          |                                                                    |
| Richest                                               | 3.94 (2.42-6.41)**                              | 9.69 (4.84-19.4) **                                  | 6.83 (4.66-10) **                                        | 8.67 (3.65-20.56) **                                               |
| Richer                                                | 1.52 (0.88-2.61)                                | 3.39 (1.61-7.16) **                                  | 3.78 (2.53-5.64) **                                      | 2.44 (0.95-6.31)                                                   |
| Middle                                                | 0.9 (0.47-1.71)                                 | 1.63 (0.69-3.81)                                     | 1.3 (0.81-2.07)                                          | 1.17 (0.37-3.7)                                                    |
| Poorer                                                | 0.9 (0.47-1.73)                                 | 0.81 (0.31-2.16)                                     | 1.13 (0.7-1.84)                                          | 0.79 (0.24-2.64)                                                   |
| Poorest                                               | Ref                                             | Ref                                                  | Ref                                                      | Ref                                                                |
| <b>Model-2 (Wealth index + sex)</b>                   |                                                 |                                                      |                                                          |                                                                    |
| <i>Wealth index</i>                                   |                                                 |                                                      |                                                          |                                                                    |
| Richest                                               | 3.93 (2.42-6.39) **                             | 9.68 (4.84-19.35) **                                 | 6.88 (4.7-10.08) **                                      | 8.69 (3.68-20.5) **                                                |
| Richer                                                | 1.51 (0.88-2.6)                                 | 3.39 (1.61-7.14) **                                  | 3.82 (2.56-5.69) **                                      | 2.45 (0.96-6.3)                                                    |
| Middle                                                | 0.9 (0.47-1.71)                                 | 1.62 (0.69-3.8)                                      | 1.31 (0.82-2.09)                                         | 1.17 (0.37-3.69)                                                   |
| Poorer                                                | 0.89 (0.47-1.71)                                | 0.81 (0.31-2.15)                                     | 1.16 (0.72-1.89)                                         | 0.8 (0.24-2.63)                                                    |
| Poorest                                               | Ref                                             | Ref                                                  | Ref                                                      | Ref                                                                |
| <i>Sex</i>                                            |                                                 |                                                      |                                                          |                                                                    |
| Female                                                | 0.85 (0.43-1.66)                                | 0.95 (0.49-1.85)                                     | 1.66 (1.22-2.26) **                                      | 1.21 (0.53-2.74)                                                   |
| Male                                                  | Ref                                             | Ref                                                  | Ref                                                      | Ref                                                                |
| <b>Model-3 (Wealth index + sex+ age )</b>             |                                                 |                                                      |                                                          |                                                                    |
| <i>Wealth index</i>                                   |                                                 |                                                      |                                                          |                                                                    |
| Richest                                               | 4.04 (2.49-6.56) **                             | 9.65 (4.82-19.3) **                                  | 6.92 (4.73-10.13) **                                     | 8.82 (3.74-20.82) **                                               |
| Richer                                                | 1.51 (0.88-2.59)                                | 3.4 (1.61-7.14) **                                   | 3.81 (2.55-5.67) **                                      | 2.44 (0.95-6.26)                                                   |
| Middle                                                | 0.88 (0.46-1.67)                                | 1.63 (0.7-3.81)                                      | 1.3 (0.81-2.07)                                          | 1.15 (0.37-3.65)                                                   |
| Poorer                                                | 0.86 (0.45-1.64)                                | 0.82 (0.31-2.15)                                     | 1.15 (0.71-1.87)                                         | 0.78 (0.24-2.57)                                                   |
| Poorest                                               | Ref                                             | Ref                                                  | Ref                                                      | Ref                                                                |
| <i>Sex</i>                                            |                                                 |                                                      |                                                          |                                                                    |
| Female                                                | 0.75 (0.39-1.46)                                | 0.97 (0.5-1.88)                                      | 1.61 (1.18-2.19) **                                      | 1.13 (0.5-2.54)                                                    |
| Male                                                  | Ref                                             | Ref                                                  | Ref                                                      | Ref                                                                |
| <i>Age</i>                                            |                                                 |                                                      |                                                          |                                                                    |
| Older                                                 | 2.34 (1.71-3.2) **                              | 0.88 (0.65-1.2)                                      | 1.23 (1.03-1.47) **                                      | 1.6 (1.05-2.42) **                                                 |
| Younger                                               | Ref                                             | Ref                                                  | Ref                                                      | Ref                                                                |
| <b>Model-4 (Wealth index + sex+ age + education )</b> |                                                 |                                                      |                                                          |                                                                    |

|                                                                    |                     |                      |                      |                      |
|--------------------------------------------------------------------|---------------------|----------------------|----------------------|----------------------|
| <b>Wealth index</b>                                                |                     |                      |                      |                      |
| Richest                                                            | 3.62 (2.16-6.07) ** | 7.84 (3.74-16.45) ** | 6.76 (4.55-10.03) ** | 7.56 (3.11-18.42) ** |
| Richer                                                             | 1.45 (0.84-2.51)    | 2.98 (1.37-6.5)      | 3.77 (2.53-5.63) **  | 2.24 (0.87-5.8)      |
| Middle                                                             | 0.87 (0.46-1.64)    | 1.5 (0.65-3.5)       | 1.28 (0.81-2.05)     | 1.1 (0.36-3.36)      |
| Poorer                                                             | 0.85 (0.45-1.63)    | 0.78 (0.29-2.09)     | 1.15 (0.71-1.86)     | 0.77 (0.23-2.51)     |
| Poorest                                                            | Ref                 | Ref                  | Ref                  | Ref                  |
| <b>Sex</b>                                                         |                     |                      |                      |                      |
| Female                                                             | 0.76 (0.39-1.49)    | 1.04 (0.53-2.05)     | 1.62 (1.18-2.22) **  | 1.19 (0.52-2.71)     |
| Male                                                               | Ref                 | Ref                  | Ref                  | Ref                  |
| <b>Age</b>                                                         |                     |                      |                      |                      |
| Older                                                              | 2.45 (1.79-3.36) ** | 0.97 (0.7-1.34)      | 1.25 (1.04-1.51) **  | 1.72 (1.11-2.65) **  |
| Younger                                                            | Ref                 | Ref                  | Ref                  | Ref                  |
| <b>Education</b>                                                   |                     |                      |                      |                      |
| College or higher                                                  | 1.54 (0.96-2.5)     | 1.73 (1.06-2.83) **  | 1.21 (0.91-1.61)     | 1.59 (0.85-2.97)     |
| Secondary                                                          | 0.97 (0.62-1.51)    | 1.22 (0.74-2.01)     | 0.84 (0.64-1.12)     | 1.12 (0.59-2.15)     |
| Primary                                                            | 0.96 (0.64-1.42)    | 1.35 (0.85-2.14)     | 1.13 (0.9-1.43)      | 1.17 (0.65-2.11)     |
| No education, preschool                                            | Ref                 | Ref                  | Ref                  | Ref                  |
| <b>Model-5 ( Wealth index + sex+ age + education+ occupation )</b> |                     |                      |                      |                      |
| <b>Wealth index</b>                                                |                     |                      |                      |                      |
| Richest                                                            | 2.72 (1.6-4.61) **  | 5.3 (2.54-11.05) **  | 4.97 (3.37-7.33) **  | 5.47 (2.32-12.91) ** |
| Richer                                                             | 1.18 (0.69-2.04)    | 2.29 (1.06-4.95) **  | 3.06 (2.06-4.53) **  | 1.79 (0.71-4.49)     |
| Middle                                                             | 0.75 (0.4-1.41)     | 1.24 (0.54-2.85)     | 1.11 (0.7-1.76)      | 0.93 (0.31-2.76)     |
| Poorer                                                             | 0.78 (0.41-1.49)    | 0.72 (0.27-1.88)     | 1.06 (0.65-1.7)      | 0.7 (0.22-2.26)      |
| Poorest                                                            | Ref                 | Ref                  | Ref                  | Ref                  |
| <b>Sex</b>                                                         |                     |                      |                      |                      |
| Female                                                             | 0.67 (0.35-1.31)    | 0.91 (0.47-1.78)     | 1.44 (1.06-1.96) **  | 1.05 (0.47-2.37)     |
| Male                                                               | Ref                 | Ref                  | Ref                  | Ref                  |
| <b>Age</b>                                                         |                     |                      |                      |                      |
| Older                                                              | 2.13 (1.54-2.94) ** | 0.86 (0.62-1.19)     | 1.11 (0.91-1.34)     | 1.54 (1.00-2.38) **  |
| Younger                                                            | Ref                 | Ref                  | Ref                  | Ref                  |
| <b>Education</b>                                                   |                     |                      |                      |                      |
| College or higher                                                  | 1.4 (0.86-2.28)     | 1.54 (0.94-2.51)     | 1.09 (0.82-1.45)     | 1.44 (0.77-2.71)     |
| Secondary                                                          | 1.05 (0.67-1.64)    | 1.32 (0.8-2.18)      | 0.9 (0.68-1.2)       | 1.22 (0.63-2.35)     |
| Primary                                                            | 1.03 (0.69-1.53)    | 1.41 (0.89-2.25)     | 1.18 (0.93-1.49)     | 1.24 (0.68-2.26)     |
| No education, preschool                                            | Ref                 | Ref                  | Ref                  | Ref                  |
| <b>Occupational</b>                                                |                     |                      |                      |                      |
| Non-manual                                                         | 3.32 (1.97-5.59) ** | 4.25 (2.27-7.97) **  | 3.04 (2.19-4.23) **  | 3.79 (1.67-8.61) **  |

|                                                                                        |                     |                     |                     |                      |
|----------------------------------------------------------------------------------------|---------------------|---------------------|---------------------|----------------------|
| Manual                                                                                 | Ref                 | Ref                 | Ref                 | Ref                  |
| <b>Model-5 ( Wealth index + sex+ age + education+ occupation+ place of residence )</b> |                     |                     |                     |                      |
| <b>Wealth index</b>                                                                    |                     |                     |                     |                      |
| Richest                                                                                | 2.32 (1.32-4.1) **  | 4.84 (2.26-10.4) ** | 4.85 (3.25-7.24) ** | 3.99 (1.58-10.11) ** |
| Richer                                                                                 | 1.12 (0.66-1.91)    | 2.22 (1.02-4.8)     | 3.03 (2.04-4.49)    | 1.59 (0.65-3.92)     |
| Middle                                                                                 | 0.74 (0.39-1.38)    | 1.23 (0.54-2.82)    | 1.1 (0.69-1.75)     | 0.9 (0.31-2.64)      |
| Poorer                                                                                 | 0.78 (0.41-1.48)    | 0.71 (0.27-1.88)    | 1.06 (0.65-1.7)     | 0.7 (0.22-2.24)      |
| Poorest                                                                                | Ref                 | Ref                 | Ref                 | Ref                  |
| <b>Sex</b>                                                                             |                     |                     |                     |                      |
| Female                                                                                 | 0.67 (0.35-1.31)    | 0.91 (0.47-1.78)    | 1.44 (1.06-1.96) ** | 1.05 (0.46-2.36)     |
| Male                                                                                   | Ref                 | Ref                 | Ref                 | Ref                  |
| <b>Age</b>                                                                             |                     |                     |                     |                      |
| Older                                                                                  | 2.17 (1.58-2.99) ** | 0.87 (0.62-1.21)    | 1.11 (0.91-1.35)    | 1.61 (1.05-2.49) **  |
| Younger                                                                                | Ref                 | Ref                 | Ref                 | Ref                  |
| <b>Education</b>                                                                       |                     |                     |                     |                      |
| College or higher                                                                      | 1.38 (0.85-2.25)    | 1.53 (0.93-2.5)     | 1.09 (0.82-1.45)    | 1.4 (0.74-2.63)      |
| Secondary                                                                              | 1.06 (0.68-1.65)    | 1.33 (0.8-2.19)     | 0.91 (0.68-1.2)     | 1.24 (0.65-2.38)     |
| Primary                                                                                | 1.03 (0.69-1.53)    | 1.42 (0.89-2.26)    | 1.18 (0.93-1.5)     | 1.25 (0.69-2.28)     |
| No education, preschool                                                                | Ref                 | Ref                 | Ref                 | Ref                  |
| <b>Occupational</b>                                                                    |                     |                     |                     |                      |
| Non-manual                                                                             | 3.27 (1.94-5.52) ** | 4.22 (2.26-7.9) **  | 3.04 (2.19-4.22) ** | 3.69 (1.63-8.36) **  |
| Manual                                                                                 | Ref                 | Ref                 | Ref                 | Ref                  |
| <b>Place of residence</b>                                                              |                     |                     |                     |                      |
| Urban                                                                                  | 1.33 (0.9-1.95)     | 1.17 (0.8-1.72)     | 1.04 (0.85-1.27)    | 1.72 (0.99-3.01)     |
| Rural                                                                                  | Ref                 | Ref                 | Ref                 | Ref                  |
